# Supplementary material for: SARS-COV-2 protein NSP9 promotes cytokine production by targeting TBK1
Source: PubMed Central journal article supplement (PMC10580797; doi:10.3389/fimmu.2023.1211816), 2023-10-02
Supplement: Presentation_2.pdf [file Presentation_2.pdf]

| Protein FDR | Accession | Description                                             | Sum PEP Score |
|-------------|-----------|---------------------------------------------------------|---------------|
| High        | P35579    | Myosin-9 OS=Homo sapiens OX=9606 GN=MYH9 PE=1 SV        | 920.5495552   |
| High        | P35580    | Myosin-10 OS=Homo sapiens OX=9606 GN=MYH10 PE=1         | 774.3371903   |
| High        | P11586    | C-1-tetrahydrofolate synthase, cytoplasmic OS=Homo sa   | 582.6465208   |
| High        | P49327    | Fatty acid synthase OS=Homo sapiens OX=9606 GN=FASI     | 373.0007357   |
| High        | P21333    | Filamin-A OS=Homo sapiens OX=9606 GN=FLNA PE=1 SV       | 361.8212785   |
| High        | P08238    | Heat shock protein HSP 90-beta OS=Homo sapiens OX=9     | 354.327325    |
| High        | P13639    | Elongation factor 2 OS=Homo sapiens OX=9606 GN=EEF2     | 341.7309536   |
| High        | Q7Z406    | Myosin-14 OS=Homo sapiens OX=9606 GN=MYH14 PE=1         | 305.7724931   |
| High        | P07900    | Heat shock protein HSP 90-alpha OS=Homo sapiens OX=9    | 304.6047965   |
| High        | P42704    | Leucine-rich PPR motif-containing protein, mitochondria | 257.1717346   |
| High        | O75369    | Filamin-B OS=Homo sapiens OX=9606 GN=FLNB PE=1 SV       | 254.5793077   |
| High        | Q00610    | Clathrin heavy chain 1 OS=Homo sapiens OX=9606 GN=C     | 254.4509508   |
| High        | P0DMV9    | Heat shock 70 kDa protein 1B OS=Homo sapiens OX=960     | 251.9204516   |
| High        | P22314    | Ubiquitin-like modifier-activating enzyme 1 OS=Homo sa  | 247.2944551   |
| High        | P60709    | Actin, cytoplasmic 1 OS=Homo sapiens OX=9606 GN=AC      | 239.3568553   |
| High        | P04264    | Keratin, type II cytoskeletal 1 OS=Homo sapiens OX=960  | 236.5919599   |
| High        | P04406    | Glyceraldehyde-3-phosphate dehydrogenase OS=Homo s      | 225.8974959   |
| High        | P68371    | Tubulin beta-4B chain OS=Homo sapiens OX=9606 GN=T      | 223.8522046   |
| High        | P07437    | Tubulin beta chain OS=Homo sapiens OX=9606 GN=TUBE      | 223.2709726   |
| High        | P07814    | Bifunctional glutamate/proline--tRNA ligase OS=Homo sa  | 221.7942901   |
| High        | P78527    | DNA-dependent protein kinase catalytic subunit OS=Hon   | 209.2278013   |
| High        | P13645    | Keratin, type I cytoskeletal 10 OS=Homo sapiens OX=960  | 208.0753163   |
| High        | Q7KZF4    | Staphylococcal nuclease domain-containing protein 1 OS  | 204.4431691   |
| High        | P11142    | Heat shock cognate 71 kDa protein OS=Homo sapiens OX    | 198.8341631   |
| High        | Q92616    | eIF-2-alpha kinase activator GCN1 OS=Homo sapiens OX=   | 197.2616186   |
| High        | P41252    | Isoleucine--tRNA ligase, cytoplasmic OS=Homo sapiens C  | 196.103965    |
| High        | Q14697    | Neutral alpha-glucosidase AB OS=Homo sapiens OX=960     | 194.3124704   |
| High        | P09874    | Poly [ADP-ribose] polymerase 1 OS=Homo sapiens OX=9     | 191.3006722   |
| High        | P14618    | Pyruvate kinase PKM OS=Homo sapiens OX=9606 GN=PK       | 189.678516    |
| High        | Q13885    | Tubulin beta-2A chain OS=Homo sapiens OX=9606 GN=T      | 187.4616208   |
| High        | P49588    | Alanine--tRNA ligase, cytoplasmic OS=Homo sapiens OX=   | 184.8359887   |
| High        | P35527    | Keratin, type I cytoskeletal 9 OS=Homo sapiens OX=9606  | 183.8133765   |
| High        | P06733    | Alpha-enolase OS=Homo sapiens OX=9606 GN=ENO1 PE=       | 183.3634183   |
| High        | P04350    | Tubulin beta-4A chain OS=Homo sapiens OX=9606 GN=T      | 180.3924146   |
| High        | P33993    | DNA replication licensing factor MCM7 OS=Homo sapien    | 177.4680699   |
| High        | Q86VP6    | Cullin-associated NEDD8-dissociated protein 1 OS=Homoc  | 176.15468     |
| High        | Q9P2J5    | Leucine--tRNA ligase, cytoplasmic OS=Homo sapiens OX=   | 174.1428779   |
| High        | P35908    | Keratin, type II cytoskeletal 2 epidermal OS=Homo sapie | 172.5647524   |
| High        | P52732    | Kinesin-like protein KIF11 OS=Homo sapiens OX=9606 GN   | 170.4929305   |
| High        | O14980    | Exportin-1 OS=Homo sapiens OX=9606 GN=XPO1 PE=1 S       | 168.7866632   |
| High        | P33991    | DNA replication licensing factor MCM4 OS=Homo sapien    | 166.1308995   |
| High        | P55060    | Exportin-2 OS=Homo sapiens OX=9606 GN=CSE1L PE=1 S      | 164.1998595   |
| High        | P27708    | CAD protein OS=Homo sapiens OX=9606 GN=CAD PE=1 S       | 159.1506325   |
| High        | Q9BQE3    | Tubulin alpha-1C chain OS=Homo sapiens OX=9606 GN=      | 153.6838492   |
| High        | P11021    | Endoplasmic reticulum chaperone BiP OS=Homo sapiens     | 150.6935388   |
| High        | P68363    | Tubulin alpha-1B chain OS=Homo sapiens OX=9606 GN=      | 148.3700574   |

|      |        |                                                                                      |             |
|------|--------|--------------------------------------------------------------------------------------|-------------|
| High | P22102 | Trifunctional purine biosynthetic protein adenosine-3 OS=Homo sapiens OX=9606 GN=VAR | 146.4388705 |
| High | Q9Y4L1 | Hypoxia up-regulated protein 1 OS=Homo sapiens OX=9606 GN=VAR                        | 143.4348807 |
| High | Q9UJZ1 | Stomatin-like protein 2, mitochondrial OS=Homo sapiens OX=9606 GN=VAR                | 140.070893  |
| High | Q71U36 | Tubulin alpha-1A chain OS=Homo sapiens OX=9606 GN=VAR                                | 139.6996094 |
| High | P49368 | T-complex protein 1 subunit gamma OS=Homo sapiens OX=9606 GN=VAR                     | 138.0946601 |
| High | P14625 | Endoplasmic reticulum chaperone protein OS=Homo sapiens OX=9606 GN=HSP90B1           | 137.3122175 |
| High | P55786 | Puromycin-sensitive aminopeptidase OS=Homo sapiens OX=9606 GN=VAR                    | 137.2100872 |
| High | Q13263 | Transcription intermediary factor 1-beta OS=Homo sapiens OX=9606 GN=VAR              | 136.0757811 |
| High | Q00839 | Heterogeneous nuclear ribonucleoprotein U OS=Homo sapiens OX=9606 GN=VAR             | 130.4806817 |
| High | P49915 | GMP synthase [glutamine-hydrolyzing] OS=Homo sapiens OX=9606 GN=VAR                  | 127.6449423 |
| High | Q14974 | Importin subunit beta-1 OS=Homo sapiens OX=9606 GN=VAR                               | 127.448672  |
| High | P26640 | Valine--tRNA ligase OS=Homo sapiens OX=9606 GN=VAR                                   | 126.0991452 |
| High | P05023 | Sodium/potassium-transporting ATPase subunit alpha-1 OS=Homo sapiens OX=9606 GN=VAR  | 125.9154949 |
| High | P41250 | Glycine--tRNA ligase OS=Homo sapiens OX=9606 GN=VAR                                  | 123.5212798 |
| High | O00410 | Importin-5 OS=Homo sapiens OX=9606 GN=IPO5 PE=1 SV=1                                 | 120.4459169 |
| High | P27824 | Calnexin OS=Homo sapiens OX=9606 GN=CANX PE=1 SV=1                                   | 120.0033    |
| High | P68104 | Elongation factor 1-alpha 1 OS=Homo sapiens OX=9606 GN=VAR                           | 112.4411751 |
| High | Q14566 | DNA replication licensing factor MCM6 OS=Homo sapiens OX=9606 GN=VAR                 | 112.0475909 |
| High | Q4VCS5 | Angiomotin OS=Homo sapiens OX=9606 GN=AMOT PE=1 SV=1                                 | 111.4171729 |
| High | P68032 | Actin, alpha cardiac muscle 1 OS=Homo sapiens OX=9606 GN=VAR                         | 109.1392008 |
| High | P49736 | DNA replication licensing factor MCM2 OS=Homo sapiens OX=9606 GN=VAR                 | 108.2357553 |
| High | Q9NSE4 | Isoleucine--tRNA ligase, mitochondrial OS=Homo sapiens OX=9606 GN=VAR                | 106.8720908 |
| High | P25205 | DNA replication licensing factor MCM3 OS=Homo sapiens OX=9606 GN=VAR                 | 106.5618367 |
| High | Q04637 | Eukaryotic translation initiation factor 4 gamma 1 OS=Homo sapiens OX=9606 GN=VAR    | 106.2651108 |
| High | P34931 | Heat shock 70 kDa protein 1-like OS=Homo sapiens OX=9606 GN=VAR                      | 106.1410655 |
| High | Q13200 | 26S proteasome non-ATPase regulatory subunit 2 OS=Homo sapiens OX=9606 GN=VAR        | 104.4126776 |
| High | P38646 | Stress-70 protein, mitochondrial OS=Homo sapiens OX=9606 GN=VAR                      | 101.3413245 |
| High | P53618 | Coatomer subunit beta OS=Homo sapiens OX=9606 GN=VAR                                 | 100.636416  |
| High | O15067 | Phosphoribosylformylglycinamide synthase OS=Homo sapiens OX=9606 GN=VAR              | 99.43638055 |
| High | Q14008 | Cytoskeleton-associated protein 5 OS=Homo sapiens OX=9606 GN=VAR                     | 99.20809168 |
| High | O95373 | Importin-7 OS=Homo sapiens OX=9606 GN=IPO7 PE=1 SV=1                                 | 98.95985918 |
| High | P56192 | Methionine--tRNA ligase, cytoplasmic OS=Homo sapiens OX=9606 GN=VAR                  | 97.45165627 |
| High | P46940 | Ras GTPase-activating-like protein IQGAP1 OS=Homo sapiens OX=9606 GN=VAR             | 96.2796502  |
| High | P49411 | Elongation factor Tu, mitochondrial OS=Homo sapiens OX=9606 GN=VAR                   | 93.80464359 |
| High | O95347 | Structural maintenance of chromosomes protein 2 OS=Homo sapiens OX=9606 GN=VAR       | 92.69948329 |
| High | Q92841 | Probable ATP-dependent RNA helicase DDX17 OS=Homo sapiens OX=9606 GN=VAR             | 89.55172774 |
| High | P60842 | Eukaryotic initiation factor 4A-I OS=Homo sapiens OX=9606 GN=VAR                     | 87.73587154 |
| High | Q14166 | Tubulin--tyrosine ligase-like protein 12 OS=Homo sapiens OX=9606 GN=VAR              | 87.33803715 |
| High | P16615 | Sarcoplasmic/endoplasmic reticulum calcium ATPase 2 C OS=Homo sapiens OX=9606 GN=VAR | 86.44630557 |
| High | O00429 | Dynamin-1-like protein OS=Homo sapiens OX=9606 GN=VAR                                | 86.33970183 |
| High | P22626 | Heterogeneous nuclear ribonucleoproteins A2/B1 OS=Homo sapiens OX=9606 GN=VAR        | 86.21298367 |
| High | Q08J23 | tRNA (cytosine(34)-C(5))-methyltransferase OS=Homo sapiens OX=9606 GN=VAR            | 85.63641354 |
| High | Q9Y2L1 | Exosome complex exonuclease RRP44 OS=Homo sapiens OX=9606 GN=VAR                     | 85.45624722 |
| High | Q08211 | ATP-dependent RNA helicase A OS=Homo sapiens OX=9606 GN=VAR                          | 84.47884026 |
| High | P19338 | Nucleolin OS=Homo sapiens OX=9606 GN=NCL PE=1 SV=1                                   | 83.08182299 |
| High | P23246 | Splicing factor, proline- and glutamine-rich OS=Homo sapiens OX=9606 GN=VAR          | 80.53115439 |
| High | Q15365 | Poly(rC)-binding protein 1 OS=Homo sapiens OX=9606 GN=VAR                            | 80.09716314 |

|      |        |                                                                                                             |             |
|------|--------|-------------------------------------------------------------------------------------------------------------|-------------|
| High | P12268 | Inosine-5'-monophosphate dehydrogenase 2 OS=Homo sapiens OX=9606 GN=HSD17B10 PE=1 SV=1                      | 79.92046028 |
| High | P34932 | Heat shock 70 kDa protein 4 OS=Homo sapiens OX=9606 GN=HSP70 PE=1 SV=1                                      | 79.46299094 |
| High | Q8TEX9 | Importin-4 OS=Homo sapiens OX=9606 GN=IPO4 PE=1 SV=1                                                        | 78.50808901 |
| High | Q6P2Q9 | Pre-mRNA-processing-splicing factor 8 OS=Homo sapiens OX=9606 GN=PRPF8 PE=1 SV=1                            | 77.96977669 |
| High | Q9BUF5 | Tubulin beta-6 chain OS=Homo sapiens OX=9606 GN=TUBB6 PE=1 SV=1                                             | 75.89490776 |
| High | P10809 | 60 kDa heat shock protein, mitochondrial OS=Homo sapiens OX=9606 GN=HSP60 PE=1 SV=1                         | 74.7376022  |
| High | O75533 | Splicing factor 3B subunit 1 OS=Homo sapiens OX=9606 GN=SF3B1 PE=1 SV=1                                     | 74.56883964 |
| High | P02533 | Keratin, type I cytoskeletal 14 OS=Homo sapiens OX=9606 GN=KRT14 PE=1 SV=1                                  | 74.5574444  |
| High | P17987 | T-complex protein 1 subunit alpha OS=Homo sapiens OX=9606 GN=TC1A PE=1 SV=1                                 | 74.52436881 |
| High | Q96QK1 | Vacuolar protein sorting-associated protein 35 OS=Homo sapiens OX=9606 GN=VPS35 PE=1 SV=1                   | 73.58989244 |
| High | P52272 | Heterogeneous nuclear ribonucleoprotein M OS=Homo sapiens OX=9606 GN=HNRM PE=1 SV=1                         | 73.39902629 |
| High | P17066 | Heat shock 70 kDa protein 6 OS=Homo sapiens OX=9606 GN=HSP70 PE=1 SV=1                                      | 71.12339736 |
| High | P54652 | Heat shock-related 70 kDa protein 2 OS=Homo sapiens OX=9606 GN=HSP70 PE=1 SV=1                              | 70.50751482 |
| High | Q15366 | Poly(rC)-binding protein 2 OS=Homo sapiens OX=9606 GN=PCBP2 PE=1 SV=1                                       | 69.69950551 |
| High | P28331 | NADH-ubiquinone oxidoreductase 75 kDa subunit, mitochondrial OS=Homo sapiens OX=9606 GN=ND75 PE=1 SV=1      | 69.64440361 |
| High | Q92945 | Far upstream element-binding protein 2 OS=Homo sapiens OX=9606 GN=FEA2 PE=1 SV=1                            | 69.28093194 |
| High | P08865 | 40S ribosomal protein SA OS=Homo sapiens OX=9606 GN=PSA PE=1 SV=1                                           | 69.11260397 |
| High | P43243 | Matrin-3 OS=Homo sapiens OX=9606 GN=MATR3 PE=1 SV=1                                                         | 69.0860798  |
| High | O60763 | General vesicular transport factor p115 OS=Homo sapiens OX=9606 GN=VPS35 PE=1 SV=1                          | 67.87505621 |
| High | P48643 | T-complex protein 1 subunit epsilon OS=Homo sapiens OX=9606 GN=TC1E PE=1 SV=1                               | 67.26109835 |
| High | Q14315 | Filamin-C OS=Homo sapiens OX=9606 GN=FLNC PE=1 SV=1                                                         | 67.19809386 |
| High | Q15021 | Condensin complex subunit 1 OS=Homo sapiens OX=9606 GN=CCNA1 PE=1 SV=1                                      | 66.50961475 |
| High | P33176 | Kinesin-1 heavy chain OS=Homo sapiens OX=9606 GN=KIF5B PE=1 SV=1                                            | 66.4831308  |
| High | Q00341 | Vigilin OS=Homo sapiens OX=9606 GN=HDLBP PE=1 SV=2                                                          | 65.98311082 |
| High | Q15029 | 116 kDa U5 small nuclear ribonucleoprotein component OS=Homo sapiens OX=9606 GN=SNRNP116 PE=1 SV=1          | 65.76403991 |
| High | P47897 | Glutamine--tRNA ligase OS=Homo sapiens OX=9606 GN=HDLBP PE=1 SV=2                                           | 65.6432104  |
| High | P54886 | Delta-1-pyrroline-5-carboxylate synthase OS=Homo sapiens OX=9606 GN=PCSK1 PE=1 SV=1                         | 65.42905523 |
| High | P61978 | Heterogeneous nuclear ribonucleoprotein K OS=Homo sapiens OX=9606 GN=HNRK PE=1 SV=1                         | 64.75847833 |
| High | P09651 | Heterogeneous nuclear ribonucleoprotein A1 OS=Homo sapiens OX=9606 GN=HNRA1 PE=1 SV=1                       | 64.47954791 |
| High | Q13620 | Cullin-4B OS=Homo sapiens OX=9606 GN=CUL4B PE=1 SV=1                                                        | 63.79282557 |
| High | Q16643 | Drebrin OS=Homo sapiens OX=9606 GN=DBN1 PE=1 SV=1                                                           | 63.53722428 |
| High | O75694 | Nuclear pore complex protein Nup155 OS=Homo sapiens OX=9606 GN=NUP155 PE=1 SV=1                             | 63.03486951 |
| High | P26641 | Elongation factor 1-gamma OS=Homo sapiens OX=9606 GN=EF1G PE=1 SV=1                                         | 62.8498087  |
| High | P63244 | Receptor of activated protein C kinase 1 OS=Homo sapiens OX=9606 GN=RACK1 PE=1 SV=1                         | 62.69382133 |
| High | P25705 | ATP synthase subunit alpha, mitochondrial OS=Homo sapiens OX=9606 GN=ATP5F1 PE=1 SV=1                       | 62.47757167 |
| High | Q93009 | Ubiquitin carboxyl-terminal hydrolase 7 OS=Homo sapiens OX=9606 GN=UBPH7 PE=1 SV=1                          | 62.27045454 |
| High | P04843 | Dolichyl-diphosphooligosaccharide--protein glycosyltransferase 1 OS=Homo sapiens OX=9606 GN=DOLY1 PE=1 SV=1 | 61.33862093 |
| High | O00571 | ATP-dependent RNA helicase DDX3X OS=Homo sapiens OX=9606 GN=DDX3X PE=1 SV=1                                 | 60.2792716  |
| High | P40939 | Trifunctional enzyme subunit alpha, mitochondrial OS=Homo sapiens OX=9606 GN=TFAM PE=1 SV=1                 | 59.42715661 |
| High | Q14152 | Eukaryotic translation initiation factor 3 subunit A OS=Homo sapiens OX=9606 GN=EIF3A PE=1 SV=1             | 59.09083534 |
| High | O75643 | U5 small nuclear ribonucleoprotein 200 kDa helicase OS=Homo sapiens OX=9606 GN=SNRNP200 PE=1 SV=1           | 59.05368209 |
| High | Q12931 | Heat shock protein 75 kDa, mitochondrial OS=Homo sapiens OX=9606 GN=HSP75 PE=1 SV=1                         | 58.05836812 |
| High | Q9BQG0 | Myb-binding protein 1A OS=Homo sapiens OX=9606 GN=MYBBP1A PE=1 SV=1                                         | 57.9018095  |
| High | O96008 | Mitochondrial import receptor subunit TOM40 homolog OS=Homo sapiens OX=9606 GN=TIMM40 PE=1 SV=1             | 57.64960431 |
| High | Q14568 | Heat shock protein HSP 90-alpha A2 OS=Homo sapiens OX=9606 GN=HSP90A2 PE=1 SV=1                             | 57.52864406 |
| High | Q92499 | ATP-dependent RNA helicase DDX1 OS=Homo sapiens OX=9606 GN=DDX1 PE=1 SV=1                                   | 56.56662424 |
| High | P14866 | Heterogeneous nuclear ribonucleoprotein L OS=Homo sapiens OX=9606 GN=HNRNL PE=1 SV=1                        | 56.37527529 |

|      |        |                                                            |             |
|------|--------|------------------------------------------------------------|-------------|
| High | Q96P70 | Importin-9 OS=Homo sapiens OX=9606 GN=IPO9 PE=1 S          | 56.26851173 |
| High | Q14203 | Dynactin subunit 1 OS=Homo sapiens OX=9606 GN=DCTI         | 56.11541913 |
| High | O94832 | Unconventional myosin-IId OS=Homo sapiens OX=9606 G        | 55.86208231 |
| High | A5YKK6 | CCR4-NOT transcription complex subunit 1 OS=Homo sap       | 55.7542634  |
| High | P55265 | Double-stranded RNA-specific adenosine deaminase OS=       | 55.5804048  |
| High | Q5VYK3 | Proteasome adapter and scaffold protein ECM29 OS=Ho        | 55.07528799 |
| High | P53621 | Coatomer subunit alpha OS=Homo sapiens OX=9606 GN:         | 54.90377591 |
| High | P78371 | T-complex protein 1 subunit beta OS=Homo sapiens OX=       | 54.80785805 |
| High | P43246 | DNA mismatch repair protein Msh2 OS=Homo sapiens O         | 54.75916411 |
| High | P15924 | Desmoplakin OS=Homo sapiens OX=9606 GN=DSP PE=1            | 54.34440193 |
| High | Q14694 | Ubiquitin carboxyl-terminal hydrolase 10 OS=Homo sapie     | 54.07864368 |
| High | P52701 | DNA mismatch repair protein Msh6 OS=Homo sapiens O         | 53.67661972 |
| High | Q9Y3F4 | Serine-threonine kinase receptor-associated protein OS=    | 52.61387482 |
| High | P55072 | Transitional endoplasmic reticulum ATPase OS=Homo sa       | 52.59997197 |
| High | Q9UQE7 | Structural maintenance of chromosomes protein 3 OS=H       | 52.54477734 |
| High | P24752 | Acetyl-CoA acetyltransferase, mitochondrial OS=Homo s      | 52.17708939 |
| High | P06737 | Glycogen phosphorylase, liver form OS=Homo sapiens O       | 52.05230653 |
| High | P26639 | Threonine--tRNA ligase, cytoplasmic OS=Homo sapiens C      | 51.98457235 |
| High | P08195 | 4F2 cell-surface antigen heavy chain OS=Homo sapiens C     | 51.83370595 |
| High | P78344 | Eukaryotic translation initiation factor 4 gamma 2 OS=Hc   | 51.45287131 |
| High | O60716 | Catenin delta-1 OS=Homo sapiens OX=9606 GN=CTNND1          | 51.3241013  |
| High | Q8WUM4 | Programmed cell death 6-interacting protein OS=Homo s      | 50.77580418 |
| High | O60749 | Sorting nexin-2 OS=Homo sapiens OX=9606 GN=SNX2 PE         | 50.72356189 |
| High | P04075 | Fructose-bisphosphate aldolase A OS=Homo sapiens OX=       | 50.71426703 |
| High | Q29RF7 | Sister chromatid cohesion protein PDS5 homolog A OS=H      | 50.56278967 |
| High | Q16891 | MICOS complex subunit MIC60 OS=Homo sapiens OX=96          | 50.39326128 |
| High | Q96N67 | Dedicator of cytokinesis protein 7 OS=Homo sapiens OX=     | 49.66549972 |
| High | Q12906 | Interleukin enhancer-binding factor 3 OS=Homo sapiens      | 49.53323864 |
| High | P55884 | Eukaryotic translation initiation factor 3 subunit B OS=Hc | 49.52136036 |
| High | P11940 | Polyadenylate-binding protein 1 OS=Homo sapiens OX=9       | 49.30751534 |
| High | Q9HAV4 | Exportin-5 OS=Homo sapiens OX=9606 GN=XPO5 PE=1 S          | 49.29475216 |
| High | P46379 | Large proline-rich protein BAG6 OS=Homo sapiens OX=9       | 48.77451108 |
| High | Q562R1 | Beta-actin-like protein 2 OS=Homo sapiens OX=9606 GN:      | 48.7631356  |
| High | Q92900 | Regulator of nonsense transcripts 1 OS=Homo sapiens O      | 48.08690643 |
| High | P50990 | T-complex protein 1 subunit theta OS=Homo sapiens OX:      | 48.06531072 |
| High | O43175 | D-3-phosphoglycerate dehydrogenase OS=Homo sapiens         | 47.90464335 |
| High | P50570 | Dynamamin-2 OS=Homo sapiens OX=9606 GN=DNM2 PE=1           | 47.39481216 |
| High | P19367 | Hexokinase-1 OS=Homo sapiens OX=9606 GN=HK1 PE=1           | 47.17030207 |
| High | P28340 | DNA polymerase delta catalytic subunit OS=Homo sapier      | 46.26149651 |
| High | P78347 | General transcription factor II-I OS=Homo sapiens OX=96    | 46.25367976 |
| High | Q9NVI1 | Fanconi anemia group I protein OS=Homo sapiens OX=96       | 46.09247861 |
| High | P13010 | X-ray repair cross-complementing protein 5 OS=Homo sa      | 45.84816993 |
| High | Q14683 | Structural maintenance of chromosomes protein 1A OS=       | 45.61950919 |
| High | P36578 | 60S ribosomal protein L4 OS=Homo sapiens OX=9606 GN        | 45.60926542 |
| High | P05141 | ADP/ATP translocase 2 OS=Homo sapiens OX=9606 GN=          | 45.14104091 |
| High | P52789 | Hexokinase-2 OS=Homo sapiens OX=9606 GN=HK2 PE=1           | 44.87224056 |
| High | P11216 | Glycogen phosphorylase, brain form OS=Homo sapiens C       | 44.80616755 |

|      |        |                                                          |             |
|------|--------|----------------------------------------------------------|-------------|
| High | O95202 | Mitochondrial proton/calcium exchanger protein OS=Ho     | 44.14314236 |
| High | P17812 | CTP synthase 1 OS=Homo sapiens OX=9606 GN=CTPS1 P        | 44.06928042 |
| High | P53396 | ATP-citrate synthase OS=Homo sapiens OX=9606 GN=AC       | 43.74193314 |
| High | Q9BXW7 | Haloacid dehalogenase-like hydrolase domain-containing   | 43.52115958 |
| High | Q05639 | Elongation factor 1-alpha 2 OS=Homo sapiens OX=9606 C    | 43.20870214 |
| High | Q9UNF1 | Melanoma-associated antigen D2 OS=Homo sapiens OX=       | 43.04049087 |
| High | O43390 | Heterogeneous nuclear ribonucleoprotein R OS=Homo sa     | 43.03504488 |
| High | P57737 | Coronin-7 OS=Homo sapiens OX=9606 GN=CORO7 PE=1          | 42.75925001 |
| High | Q9Y490 | Talin-1 OS=Homo sapiens OX=9606 GN=TLN1 PE=1 SV=3        | 42.16181546 |
| High | P17844 | Probable ATP-dependent RNA helicase DDX5 OS=Homo s       | 41.90541269 |
| High | Q8IXI1 | Mitochondrial Rho GTPase 2 OS=Homo sapiens OX=9606       | 41.90271992 |
| High | O94906 | Pre-mRNA-processing factor 6 OS=Homo sapiens OX=960      | 41.72148452 |
| High | Q15233 | Non-POU domain-containing octamer-binding protein OS     | 41.70658084 |
| High | Q92797 | Symplekin OS=Homo sapiens OX=9606 GN=SYMPK PE=1          | 41.61377533 |
| High | Q8N0X7 | Spartin OS=Homo sapiens OX=9606 GN=SPART PE=1 SV=        | 41.40294094 |
| High | Q9C0C9 | (E3-independent) E2 ubiquitin-conjugating enzyme OS=H    | 41.25216066 |
| High | P20700 | Lamin-B1 OS=Homo sapiens OX=9606 GN=LMNB1 PE=1 S         | 41.02403627 |
| High | P51991 | Heterogeneous nuclear ribonucleoprotein A3 OS=Homo       | 40.98651736 |
| High | P23921 | Ribonucleoside-diphosphate reductase large subunit OS=   | 40.95538816 |
| High | P12277 | Creatine kinase B-type OS=Homo sapiens OX=9606 GN=C      | 40.82986084 |
| High | Q5JTZ9 | Alanine--tRNA ligase, mitochondrial OS=Homo sapiens O    | 40.76659405 |
| High | Q15386 | Ubiquitin-protein ligase E3C OS=Homo sapiens OX=9606     | 40.63048224 |
| High | Q9BPX3 | Condensin complex subunit 3 OS=Homo sapiens OX=960       | 40.57476513 |
| High | P61204 | ADP-ribosylation factor 3 OS=Homo sapiens OX=9606 GN     | 40.53207271 |
| High | Q02809 | Procollagen-lysine,2-oxoglutarate 5-dioxygenase 1 OS=H   | 40.2929819  |
| High | P31939 | Bifunctional purine biosynthesis protein PURH OS=Homoc   | 39.8066703  |
| High | O43143 | Pre-mRNA-splicing factor ATP-dependent RNA helicase D    | 39.39402933 |
| High | P54577 | Tyrosine--tRNA ligase, cytoplasmic OS=Homo sapiens OX    | 39.22415514 |
| High | Q06210 | Glutamine--fructose-6-phosphate aminotransferase [isor   | 39.20845105 |
| High | Q6UB35 | Monofunctional C1-tetrahydrofolate synthase, mitochor    | 39.18462699 |
| High | P08779 | Keratin, type I cytoskeletal 16 OS=Homo sapiens OX=960   | 39.11238557 |
| High | P00558 | Phosphoglycerate kinase 1 OS=Homo sapiens OX=9606 C      | 39.09055962 |
| High | Q92973 | Transportin-1 OS=Homo sapiens OX=9606 GN=TNPO1 PE        | 38.77844753 |
| High | P06576 | ATP synthase subunit beta, mitochondrial OS=Homo sap     | 38.76569014 |
| High | P07195 | L-lactate dehydrogenase B chain OS=Homo sapiens OX=9     | 38.71749339 |
| High | O75534 | Cold shock domain-containing protein E1 OS=Homo sapi     | 38.49941181 |
| High | Q96GX5 | Serine/threonine-protein kinase greatwall OS=Homo sap    | 38.44262861 |
| High | P62820 | Ras-related protein Rab-1A OS=Homo sapiens OX=9606 C     | 38.43410992 |
| High | Q9NZI8 | Insulin-like growth factor 2 mRNA-binding protein 1 OS=I | 38.11994453 |
| High | P30876 | DNA-directed RNA polymerase II subunit RPB2 OS=Homoc     | 38.03767168 |
| High | Q15393 | Splicing factor 3B subunit 3 OS=Homo sapiens OX=9606 C   | 37.83928842 |
| High | P04844 | Dolichyl-diphosphooligosaccharide--protein glycosyltran  | 37.62731752 |
| High | P45974 | Ubiquitin carboxyl-terminal hydrolase 5 OS=Homo sapien   | 37.58260321 |
| High | Q9H0D6 | 5'-3' exoribonuclease 2 OS=Homo sapiens OX=9606 GN=      | 37.53945673 |
| High | P51617 | Interleukin-1 receptor-associated kinase 1 OS=Homo sap   | 37.51393705 |
| High | Q9BSJ8 | Extended synaptotagmin-1 OS=Homo sapiens OX=9606 C       | 37.42610538 |
| High | Q9BQ52 | Zinc phosphodiesterase ELAC protein 2 OS=Homo sapien     | 37.294002   |

|      |        |                                                         |             |
|------|--------|---------------------------------------------------------|-------------|
| High | A0AVT1 | Ubiquitin-like modifier-activating enzyme 6 OS=Homo sa  | 37.28053574 |
| High | Q9BXP5 | Serrate RNA effector molecule homolog OS=Homo sapie     | 37.20408311 |
| High | Q14C86 | GTPase-activating protein and VPS9 domain-containing p  | 37.0776214  |
| High | P12956 | X-ray repair cross-complementing protein 6 OS=Homo sa   | 36.71108509 |
| High | O43707 | Alpha-actinin-4 OS=Homo sapiens OX=9606 GN=ACTN4 F      | 36.38835753 |
| High | O14654 | Insulin receptor substrate 4 OS=Homo sapiens OX=9606    | 36.34488078 |
| High | P51812 | Ribosomal protein S6 kinase alpha-3 OS=Homo sapiens C   | 36.24017402 |
| High | P18085 | ADP-ribosylation factor 4 OS=Homo sapiens OX=9606 GN    | 36.04265854 |
| High | O15397 | Importin-8 OS=Homo sapiens OX=9606 GN=IPO8 PE=1 SV      | 35.97699948 |
| High | P05388 | 60S acidic ribosomal protein P0 OS=Homo sapiens OX=96   | 35.82678691 |
| High | Q14160 | Protein scribble homolog OS=Homo sapiens OX=9606 GN     | 35.80922053 |
| High | Q99798 | Aconitate hydratase, mitochondrial OS=Homo sapiens O    | 35.37500889 |
| High | P06748 | Nucleophosmin OS=Homo sapiens OX=9606 GN=NPM1 F         | 35.2253347  |
| High | Q02878 | 60S ribosomal protein L6 OS=Homo sapiens OX=9606 GN     | 35.08512704 |
| High | P36776 | Lon protease homolog, mitochondrial OS=Homo sapiens     | 34.87593846 |
| High | P08670 | Vimentin OS=Homo sapiens OX=9606 GN=VIM PE=1 SV=        | 34.86493877 |
| High | P00338 | L-lactate dehydrogenase A chain OS=Homo sapiens OX=9    | 34.85588925 |
| High | Q8WWM7 | Ataxin-2-like protein OS=Homo sapiens OX=9606 GN=AT     | 34.83520341 |
| High | P11498 | Pyruvate carboxylase, mitochondrial OS=Homo sapiens C   | 34.76828728 |
| High | P13647 | Keratin, type II cytoskeletal 5 OS=Homo sapiens OX=960  | 34.70285615 |
| High | Q9BTW9 | Tubulin-specific chaperone D OS=Homo sapiens OX=9606    | 34.65720685 |
| High | P52888 | Thimet oligopeptidase OS=Homo sapiens OX=9606 GN=T      | 34.59876017 |
| High | O94966 | Ubiquitin carboxyl-terminal hydrolase 19 OS=Homo sapie  | 34.57492323 |
| High | P18206 | Vinculin OS=Homo sapiens OX=9606 GN=VCL PE=1 SV=4       | 34.26981017 |
| High | Q96PK6 | RNA-binding protein 14 OS=Homo sapiens OX=9606 GN=      | 34.23146376 |
| High | P23396 | 40S ribosomal protein S3 OS=Homo sapiens OX=9606 GN     | 34.06600427 |
| High | Q99460 | 26S proteasome non-ATPase regulatory subunit 1 OS=Hc    | 33.99507945 |
| High | Q15418 | Ribosomal protein S6 kinase alpha-1 OS=Homo sapiens C   | 33.83606265 |
| High | P84085 | ADP-ribosylation factor 5 OS=Homo sapiens OX=9606 GN    | 33.83472992 |
| High | P40227 | T-complex protein 1 subunit zeta OS=Homo sapiens OX=    | 33.5452605  |
| High | Q9NTJ3 | Structural maintenance of chromosomes protein 4 OS=H    | 33.42830965 |
| High | O43795 | Unconventional myosin-Ib OS=Homo sapiens OX=9606 G      | 33.34009931 |
| High | Q2NKX8 | DNA excision repair protein ERCC-6-like OS=Homo sapier  | 33.2972545  |
| High | Q9UBF2 | Coatomer subunit gamma-2 OS=Homo sapiens OX=9606        | 33.22585853 |
| High | Q2TAL8 | Glutamine-rich protein 1 OS=Homo sapiens OX=9606 GN     | 32.81456448 |
| High | Q8N1F7 | Nuclear pore complex protein Nup93 OS=Homo sapiens      | 32.49908433 |
| High | O95433 | Activator of 90 kDa heat shock protein ATPase homolog   | 32.49601085 |
| High | Q92621 | Nuclear pore complex protein Nup205 OS=Homo sapiens     | 32.4286534  |
| High | Q14126 | Desmoglein-2 OS=Homo sapiens OX=9606 GN=DSG2 PE=        | 32.2248039  |
| High | Q7Z5K2 | Wings apart-like protein homolog OS=Homo sapiens OX=    | 31.84845901 |
| High | P50991 | T-complex protein 1 subunit delta OS=Homo sapiens OX=   | 31.45112176 |
| High | Q9UHB9 | Signal recognition particle subunit SRP68 OS=Homo sapie | 31.32487733 |
| High | P31943 | Heterogeneous nuclear ribonucleoprotein H OS=Homo s     | 31.16877007 |
| High | O94874 | E3 UFM1-protein ligase 1 OS=Homo sapiens OX=9606 GN     | 31.09908151 |
| High | O75155 | Cullin-associated NEDD8-dissociated protein 2 OS=Homc   | 30.98119576 |
| High | Q13435 | Splicing factor 3B subunit 2 OS=Homo sapiens OX=9606    | 30.97404451 |
| High | O95831 | Apoptosis-inducing factor 1, mitochondrial OS=Homo sa   | 30.68782947 |

|      |        |                                                                                                            |             |
|------|--------|------------------------------------------------------------------------------------------------------------|-------------|
| High | Q93008 | Probable ubiquitin carboxyl-terminal hydrolase FAF-X OS=Homo sapiens OX=9606 GN=FAFX1 PE=1 SV=1            | 30.5234322  |
| High | Q8TEQ6 | Gem-associated protein 5 OS=Homo sapiens OX=9606 GN=GAP5 PE=1 SV=1                                         | 30.48094456 |
| High | P38919 | Eukaryotic initiation factor 4A-III OS=Homo sapiens OX=9606 GN=EIF4A3 PE=1 SV=1                            | 30.43486766 |
| High | Q06830 | Peroxiredoxin-1 OS=Homo sapiens OX=9606 GN=PRDX1 PE=1 SV=1                                                 | 30.38628903 |
| High | P38159 | RNA-binding motif protein, X chromosome OS=Homo sapiens OX=9606 GN=RBMX1 PE=1 SV=1                         | 30.2620956  |
| High | P17858 | ATP-dependent 6-phosphofructokinase, liver type OS=Homo sapiens OX=9606 GN=PFKL1 PE=1 SV=1                 | 30.18644689 |
| High | Q9NSD9 | Phenylalanine--tRNA ligase beta subunit OS=Homo sapiens OX=9606 GN=PFKB2 PE=1 SV=1                         | 30.14335013 |
| High | P33992 | DNA replication licensing factor MCM5 OS=Homo sapiens OX=9606 GN=PCNA5 PE=1 SV=1                           | 29.99043958 |
| High | P04259 | Keratin, type II cytoskeletal 6B OS=Homo sapiens OX=9606 GN=KIF2B PE=1 SV=1                                | 29.97648789 |
| High | P27695 | DNA-(apurinic or apyrimidinic site) lyase OS=Homo sapiens OX=9606 GN=APLN1 PE=1 SV=1                       | 29.94211871 |
| High | P35232 | Prohibitin OS=Homo sapiens OX=9606 GN=PHB PE=1 SV=1                                                        | 29.88944642 |
| High | Q9UIA9 | Exportin-7 OS=Homo sapiens OX=9606 GN=XPO7 PE=1 SV=1                                                       | 29.78263726 |
| High | P16402 | Histone H1.3 OS=Homo sapiens OX=9606 GN=HIST1H1D PE=1 SV=1                                                 | 29.70441755 |
| High | Q9NR30 | Nucleolar RNA helicase 2 OS=Homo sapiens OX=9606 GN=RNH2 PE=1 SV=1                                         | 29.12457524 |
| High | O75153 | Clustered mitochondria protein homolog OS=Homo sapiens OX=9606 GN=CMH1 PE=1 SV=1                           | 28.77409022 |
| High | Q86Y56 | Dynein assembly factor 5, axonemal OS=Homo sapiens OX=9606 GN=DAF5 PE=1 SV=1                               | 28.66164263 |
| High | Q9Y265 | RuvB-like 1 OS=Homo sapiens OX=9606 GN=RUVBL1 PE=1 SV=1                                                    | 28.40613991 |
| High | Q9UI26 | Importin-11 OS=Homo sapiens OX=9606 GN=IPO11 PE=1 SV=1                                                     | 28.21657828 |
| High | Q9Y678 | Coatomer subunit gamma-1 OS=Homo sapiens OX=9606 GN=COG1 PE=1 SV=1                                         | 28.00375895 |
| High | Q9H3U1 | Protein unc-45 homolog A OS=Homo sapiens OX=9606 GN=UNC45 PE=1 SV=1                                        | 27.91426626 |
| High | Q13148 | TAR DNA-binding protein 43 OS=Homo sapiens OX=9606 GN=TARDBP PE=1 SV=1                                     | 27.53259003 |
| High | P62826 | GTP-binding nuclear protein Ran OS=Homo sapiens OX=9606 GN=RAN PE=1 SV=1                                   | 27.52753179 |
| High | Q05193 | Dynamin-1 OS=Homo sapiens OX=9606 GN=DNM1 PE=1 SV=1                                                        | 27.52308312 |
| High | P07197 | Neurofilament medium polypeptide OS=Homo sapiens OX=9606 GN=NF-M PE=1 SV=1                                 | 27.25395861 |
| High | Q5VUA4 | Zinc finger protein 318 OS=Homo sapiens OX=9606 GN=ZFP318 PE=1 SV=1                                        | 27.19559878 |
| High | Q8NE71 | ATP-binding cassette sub-family F member 1 OS=Homo sapiens OX=9606 GN=ABCF1 PE=1 SV=1                      | 27.15949908 |
| High | P18621 | 60S ribosomal protein L17 OS=Homo sapiens OX=9606 GN=RPL17 PE=1 SV=1                                       | 27.10546755 |
| High | Q92667 | A-kinase anchor protein 1, mitochondrial OS=Homo sapiens OX=9606 GN=AKAP1 PE=1 SV=1                        | 26.84091926 |
| High | P13797 | Plastin-3 OS=Homo sapiens OX=9606 GN=PLS3 PE=1 SV=1                                                        | 26.74829531 |
| High | Q9H0U4 | Ras-related protein Rab-1B OS=Homo sapiens OX=9606 GN=RAB1B PE=1 SV=1                                      | 26.49602283 |
| High | O75152 | Zinc finger CCCH domain-containing protein 11A OS=Homo sapiens OX=9606 GN=ZFP11A PE=1 SV=1                 | 26.24654855 |
| High | Q9BWF3 | RNA-binding protein 4 OS=Homo sapiens OX=9606 GN=RBP4 PE=1 SV=1                                            | 26.22186661 |
| High | P51665 | 26S proteasome non-ATPase regulatory subunit 7 OS=Homo sapiens OX=9606 GN=PSMD7 PE=1 SV=1                  | 26.15897176 |
| High | O60566 | Mitotic checkpoint serine/threonine-protein kinase BUB1 OS=Homo sapiens OX=9606 GN=BUB1 PE=1 SV=1          | 26.05273466 |
| High | Q9ULT8 | E3 ubiquitin-protein ligase HECTD1 OS=Homo sapiens OX=9606 GN=HECTD1 PE=1 SV=1                             | 25.93116807 |
| High | Q7L2E3 | ATP-dependent RNA helicase DHX30 OS=Homo sapiens OX=9606 GN=DHX30 PE=1 SV=1                                | 25.87723373 |
| High | O76094 | Signal recognition particle subunit SRP72 OS=Homo sapiens OX=9606 GN=SRP72 PE=1 SV=1                       | 25.83791008 |
| High | O00159 | Unconventional myosin-Ic OS=Homo sapiens OX=9606 GN=MYO1C PE=1 SV=1                                        | 25.77596216 |
| High | P51570 | Galactokinase OS=Homo sapiens OX=9606 GN=GALK1 PE=1 SV=1                                                   | 25.6558615  |
| High | P35606 | Coatomer subunit beta' OS=Homo sapiens OX=9606 GN=COG1 PE=1 SV=1                                           | 25.62384857 |
| High | P46459 | Vesicle-fusing ATPase OS=Homo sapiens OX=9606 GN=VAMP3 PE=1 SV=1                                           | 25.56827551 |
| High | P09211 | Glutathione S-transferase P OS=Homo sapiens OX=9606 GN=GSTP1 PE=1 SV=1                                     | 25.56592051 |
| High | P45880 | Voltage-dependent anion-selective channel protein 2 OS=Homo sapiens OX=9606 GN=VDAC2 PE=1 SV=1             | 25.54808578 |
| High | P54136 | Arginine--tRNA ligase, cytoplasmic OS=Homo sapiens OX=9606 GN=ARGRS1 PE=1 SV=1                             | 25.49864042 |
| High | Q9Y5L0 | Transportin-3 OS=Homo sapiens OX=9606 GN=TNPO3 PE=1 SV=1                                                   | 25.35772566 |
| High | P11177 | Pyruvate dehydrogenase E1 component subunit beta, mitochondrial OS=Homo sapiens OX=9606 GN=PDHFB PE=1 SV=1 | 25.28870935 |
| High | Q9H3P7 | Golgi resident protein GCP60 OS=Homo sapiens OX=9606 GN=GCP60 PE=1 SV=1                                    | 25.21726461 |

|      |        |                                                          |             |
|------|--------|----------------------------------------------------------|-------------|
| High | O60502 | Protein O-GlcNAcase OS=Homo sapiens OX=9606 GN=OC        | 25.09061819 |
| High | Q13310 | Polyadenylate-binding protein 4 OS=Homo sapiens OX=9     | 24.98640615 |
| High | P27635 | 60S ribosomal protein L10 OS=Homo sapiens OX=9606 G      | 24.93454347 |
| High | Q8NBJ5 | Procollagen galactosyltransferase 1 OS=Homo sapiens O    | 24.73551753 |
| High | P23378 | Glycine dehydrogenase (decarboxylating), mitochondrial   | 24.73111364 |
| High | Q15181 | Inorganic pyrophosphatase OS=Homo sapiens OX=9606        | 24.63286839 |
| High | Q14204 | Cytoplasmic dynein 1 heavy chain 1 OS=Homo sapiens O     | 24.43460835 |
| High | P42285 | Exosome RNA helicase MTR4 OS=Homo sapiens OX=960         | 24.37892766 |
| High | P62081 | 40S ribosomal protein S7 OS=Homo sapiens OX=9606 GN      | 24.31669725 |
| High | P02545 | Prelamin-A/C OS=Homo sapiens OX=9606 GN=LMNA PE=         | 24.21363876 |
| High | Q13813 | Spectrin alpha chain, non-erythrocytic 1 OS=Homo sapie   | 24.16089445 |
| High | Q5T9A4 | ATPase family AAA domain-containing protein 3B OS=Ho     | 23.86512077 |
| High | Q58FG1 | Putative heat shock protein HSP 90-alpha A4 OS=Homo s    | 23.85224903 |
| High | Q9UQ16 | Dynamin-3 OS=Homo sapiens OX=9606 GN=DNM3 PE=1           | 23.75803166 |
| High | O60313 | Dynamin-like 120 kDa protein, mitochondrial OS=Homo s    | 23.67603296 |
| High | P51148 | Ras-related protein Rab-5C OS=Homo sapiens OX=9606       | 23.67579451 |
| High | Q09161 | Nuclear cap-binding protein subunit 1 OS=Homo sapiens    | 23.61409092 |
| High | Q96RP9 | Elongation factor G, mitochondrial OS=Homo sapiens OX    | 23.59525556 |
| High | P05787 | Keratin, type II cytoskeletal 8 OS=Homo sapiens OX=960   | 23.52946692 |
| High | Q9NQW7 | Xaa-Pro aminopeptidase 1 OS=Homo sapiens OX=9606 G       | 23.29098446 |
| High | Q99623 | Prohibitin-2 OS=Homo sapiens OX=9606 GN=PHB2 PE=1        | 23.21752633 |
| High | Q3ZCQ8 | Mitochondrial import inner membrane translocase subu     | 23.05200198 |
| High | O00469 | Procollagen-lysine,2-oxoglutarate 5-dioxygenase 2 OS=H   | 22.91718407 |
| High | Q9Y230 | RuvB-like 2 OS=Homo sapiens OX=9606 GN=RUVBL2 PE=        | 22.76465914 |
| High | Q96T76 | MMS19 nucleotide excision repair protein homolog OS=I    | 22.63225597 |
| High | O95163 | Elongator complex protein 1 OS=Homo sapiens OX=9606      | 22.59118877 |
| High | Q92598 | Heat shock protein 105 kDa OS=Homo sapiens OX=9606       | 22.49902954 |
| High | P13667 | Protein disulfide-isomerase A4 OS=Homo sapiens OX=96     | 22.43846597 |
| High | Q9UHD1 | Cysteine and histidine-rich domain-containing protein 1  | 22.29011753 |
| High | O43684 | Mitotic checkpoint protein BUB3 OS=Homo sapiens OX=!     | 21.98626921 |
| High | Q96KR1 | Zinc finger RNA-binding protein OS=Homo sapiens OX=96    | 21.76963936 |
| High | O95573 | Long-chain-fatty-acid--CoA ligase 3 OS=Homo sapiens OX   | 21.66710379 |
| High | P15170 | Eukaryotic peptide chain release factor GTP-binding subu | 21.51096947 |
| High | P48735 | Isocitrate dehydrogenase [NADP], mitochondrial OS=Hor    | 21.47483935 |
| High | P52597 | Heterogeneous nuclear ribonucleoprotein F OS=Homo sa     | 21.46383031 |
| High | P11310 | Medium-chain specific acyl-CoA dehydrogenase, mitoch     | 21.35694991 |
| High | P62979 | Ubiquitin-40S ribosomal protein S27a OS=Homo sapiens     | 21.29094409 |
| High | Q9BW92 | Threonine--tRNA ligase, mitochondrial OS=Homo sapiens    | 21.28497866 |
| High | Q9NVI7 | ATPase family AAA domain-containing protein 3A OS=Ho     | 21.2373471  |
| High | Q9UG63 | ATP-binding cassette sub-family F member 2 OS=Homo s     | 21.21623742 |
| High | Q27J81 | Inverted formin-2 OS=Homo sapiens OX=9606 GN=INF2        | 21.08450938 |
| High | P47985 | Cytochrome b-c1 complex subunit Rieske, mitochondrial    | 21.06915476 |
| High | Q9H9B4 | Sideroflexin-1 OS=Homo sapiens OX=9606 GN=SFXN1 PE       | 21.05426455 |
| High | Q13838 | Spliceosome RNA helicase DDX39B OS=Homo sapiens OX       | 20.91676497 |
| High | Q15031 | Probable leucine--tRNA ligase, mitochondrial OS=Homo s   | 20.88124959 |
| High | P57678 | Gem-associated protein 4 OS=Homo sapiens OX=9606 G       | 20.84204019 |
| High | Q10567 | AP-1 complex subunit beta-1 OS=Homo sapiens OX=9606      | 20.78813027 |

|      |        |                                                          |             |
|------|--------|----------------------------------------------------------|-------------|
| High | Q9BXJ9 | N-alpha-acetyltransferase 15, NatA auxiliary subunit OS= | 20.65601808 |
| High | O43837 | Isocitrate dehydrogenase [NAD] subunit beta, mitochondr  | 20.5369611  |
| High | Q9Y613 | FH1/FH2 domain-containing protein 1 OS=Homo sapiens      | 20.49073634 |
| High | P23528 | Cofilin-1 OS=Homo sapiens OX=9606 GN=CFL1 PE=1 SV=       | 20.43625214 |
| High | P61026 | Ras-related protein Rab-10 OS=Homo sapiens OX=9606 C     | 20.31284144 |
| High | P51149 | Ras-related protein Rab-7a OS=Homo sapiens OX=9606 C     | 20.12095388 |
| High | O14974 | Protein phosphatase 1 regulatory subunit 12A OS=Homo     | 20.0874327  |
| High | Q8N766 | ER membrane protein complex subunit 1 OS=Homo sapi       | 20.04006674 |
| High | Q8TEU7 | Rap guanine nucleotide exchange factor 6 OS=Homo sap     | 19.78697582 |
| High | Q71RC2 | La-related protein 4 OS=Homo sapiens OX=9606 GN=LAF      | 19.49872357 |
| High | Q14669 | E3 ubiquitin-protein ligase TRIP12 OS=Homo sapiens OX=   | 19.43582116 |
| High | P46782 | 40S ribosomal protein S5 OS=Homo sapiens OX=9606 GN      | 19.35550758 |
| High | Q96A65 | Exocyst complex component 4 OS=Homo sapiens OX=96        | 19.28511985 |
| High | P22695 | Cytochrome b-c1 complex subunit 2, mitochondrial OS=H    | 19.22619042 |
| High | O43592 | Exportin-T OS=Homo sapiens OX=9606 GN=XPOT PE=1 S        | 19.22372085 |
| High | Q9H583 | HEAT repeat-containing protein 1 OS=Homo sapiens OX=     | 19.19950634 |
| High | P63104 | 14-3-3 protein zeta/delta OS=Homo sapiens OX=9606 GN     | 19.11042796 |
| High | Q15020 | Squamous cell carcinoma antigen recognized by T-cells 3  | 19.06587207 |
| High | Q04760 | Lactoylglutathione lyase OS=Homo sapiens OX=9606 GN:     | 19.05958351 |
| High | O14828 | Secretory carrier-associated membrane protein 3 OS=Ho    | 19.00214523 |
| High | Q8TD19 | Serine/threonine-protein kinase Nek9 OS=Homo sapiens     | 18.97826432 |
| High | P30153 | Serine/threonine-protein phosphatase 2A 65 kDa regulat   | 18.8964145  |
| High | P32969 | 60S ribosomal protein L9 OS=Homo sapiens OX=9606 GN      | 18.75061749 |
| High | Q01813 | ATP-dependent 6-phosphofructokinase, platelet type OS    | 18.74832064 |
| High | Q9Y4W6 | AFG3-like protein 2 OS=Homo sapiens OX=9606 GN=AFG       | 18.61770644 |
| High | Q14997 | Proteasome activator complex subunit 4 OS=Homo sapie     | 18.58370652 |
| High | O00411 | DNA-directed RNA polymerase, mitochondrial OS=Homo       | 18.57238885 |
| High | Q8IW35 | Centrosomal protein of 97 kDa OS=Homo sapiens OX=96      | 18.54603994 |
| High | Q8IXI2 | Mitochondrial Rho GTPase 1 OS=Homo sapiens OX=9606       | 18.51539377 |
| High | P02768 | Serum albumin OS=Homo sapiens OX=9606 GN=ALB PE=         | 18.47218406 |
| High | O94826 | Mitochondrial import receptor subunit TOM70 OS=Homo      | 18.44192085 |
| High | Q12756 | Kinesin-like protein KIF1A OS=Homo sapiens OX=9606 GI    | 18.43206166 |
| High | P52292 | Importin subunit alpha-1 OS=Homo sapiens OX=9606 GN      | 18.4102441  |
| High | Q9BTV4 | Transmembrane protein 43 OS=Homo sapiens OX=9606         | 18.40204948 |
| High | P20340 | Ras-related protein Rab-6A OS=Homo sapiens OX=9606 C     | 18.38904162 |
| High | P50213 | Isocitrate dehydrogenase [NAD] subunit alpha, mitochon   | 18.35923535 |
| High | Q66K74 | Microtubule-associated protein 1S OS=Homo sapiens OX     | 18.34357269 |
| High | Q9NTI5 | Sister chromatid cohesion protein PDS5 homolog B OS=H    | 18.30768467 |
| High | Q8WVB6 | Chromosome transmission fidelity protein 18 homolog C    | 18.27824202 |
| High | P62701 | 40S ribosomal protein S4, X isoform OS=Homo sapiens O    | 18.27522943 |
| High | P62269 | 40S ribosomal protein S18 OS=Homo sapiens OX=9606 G      | 18.23922635 |
| High | P08133 | Annexin A6 OS=Homo sapiens OX=9606 GN=ANXA6 PE=1         | 18.21256264 |
| High | Q15459 | Splicing factor 3A subunit 1 OS=Homo sapiens OX=9606 C   | 18.18228819 |
| High | O60506 | Heterogeneous nuclear ribonucleoprotein Q OS=Homo s      | 18.09731975 |
| High | P13804 | Electron transfer flavoprotein subunit alpha, mitochondr | 18.09538397 |
| High | Q99832 | T-complex protein 1 subunit eta OS=Homo sapiens OX=9     | 18.09318571 |
| High | P60891 | Ribose-phosphate pyrophosphokinase 1 OS=Homo sapie       | 18.05803303 |

|      |        |                                                            |             |
|------|--------|------------------------------------------------------------|-------------|
| High | P49790 | Nuclear pore complex protein Nup153 OS=Homo sapiens        | 18.01760569 |
| High | P26038 | Moesin OS=Homo sapiens OX=9606 GN=MSN PE=1 SV=3            | 17.87144594 |
| High | Q15758 | Neutral amino acid transporter B(0) OS=Homo sapiens O      | 17.85574494 |
| High | Q6PKG0 | La-related protein 1 OS=Homo sapiens OX=9606 GN=LAF        | 17.82125499 |
| High | Q92888 | Rho guanine nucleotide exchange factor 1 OS=Homo sap       | 17.75489091 |
| High | P14324 | Farnesyl pyrophosphate synthase OS=Homo sapiens OX=        | 17.57957315 |
| High | P61106 | Ras-related protein Rab-14 OS=Homo sapiens OX=9606 C       | 17.5684204  |
| High | Q7Z460 | CLIP-associating protein 1 OS=Homo sapiens OX=9606 G       | 17.47076578 |
| High | Q13347 | Eukaryotic translation initiation factor 3 subunit I OS=Ho | 17.35303738 |
| High | P07910 | Heterogeneous nuclear ribonucleoproteins C1/C2 OS=Hc       | 17.25992253 |
| High | O00154 | Cytosolic acyl coenzyme A thioester hydrolase OS=Homc      | 17.22344929 |
| High | Q99504 | Eyes absent homolog 3 OS=Homo sapiens OX=9606 GN=          | 17.21151354 |
| High | Q14671 | Pumilio homolog 1 OS=Homo sapiens OX=9606 GN=PUM           | 17.13358188 |
| High | P42166 | Lamina-associated polypeptide 2, isoform alpha OS=Horr     | 17.03249524 |
| High | P62805 | Histone H4 OS=Homo sapiens OX=9606 GN=HIST1H4A P           | 16.99853853 |
| High | Q99873 | Protein arginine N-methyltransferase 1 OS=Homo sapien      | 16.82625996 |
| High | P15311 | Ezrin OS=Homo sapiens OX=9606 GN=EZR PE=1 SV=4             | 16.80996082 |
| High | Q99497 | Protein/nucleic acid deglycase DJ-1 OS=Homo sapiens O      | 16.80918372 |
| High | P49591 | Serine--tRNA ligase, cytoplasmic OS=Homo sapiens OX=9      | 16.71101761 |
| High | O43156 | TELO2-interacting protein 1 homolog OS=Homo sapiens        | 16.71000755 |
| High | Q96SB4 | SRSF protein kinase 1 OS=Homo sapiens OX=9606 GN=SF        | 16.66701166 |
| High | Q32P28 | Prolyl 3-hydroxylase 1 OS=Homo sapiens OX=9606 GN=P        | 16.61215385 |
| High | Q16531 | DNA damage-binding protein 1 OS=Homo sapiens OX=96         | 16.6086069  |
| High | Q92615 | La-related protein 4B OS=Homo sapiens OX=9606 GN=LA        | 16.49794658 |
| High | P34897 | Serine hydroxymethyltransferase, mitochondrial OS=Hor      | 16.45572374 |
| High | P49755 | Transmembrane emp24 domain-containing protein 10 O         | 16.4323008  |
| High | P06493 | Cyclin-dependent kinase 1 OS=Homo sapiens OX=9606 G        | 16.42277142 |
| High | O60341 | Lysine-specific histone demethylase 1A OS=Homo sapien      | 16.2694421  |
| High | P38606 | V-type proton ATPase catalytic subunit A OS=Homo sapie     | 16.10917846 |
| High | Q9H2M9 | Rab3 GTPase-activating protein non-catalytic subunit OS    | 16.10415497 |
| High | P31930 | Cytochrome b-c1 complex subunit 1, mitochondrial OS=H      | 16.09449581 |
| High | P39023 | 60S ribosomal protein L3 OS=Homo sapiens OX=9606 GN        | 15.96512585 |
| High | P27816 | Microtubule-associated protein 4 OS=Homo sapiens OX=       | 15.94644689 |
| High | Q8IYD1 | Eukaryotic peptide chain release factor GTP-binding subu   | 15.92722616 |
| High | P14868 | Aspartate--tRNA ligase, cytoplasmic OS=Homo sapiens O      | 15.87956931 |
| High | Q15003 | Condensin complex subunit 2 OS=Homo sapiens OX=960         | 15.87243145 |
| High | Q9BQ39 | ATP-dependent RNA helicase DDX50 OS=Homo sapiens C         | 15.86382719 |
| High | P26599 | Polypyrimidine tract-binding protein 1 OS=Homo sapiens     | 15.69853282 |
| High | Q15046 | Lysine--tRNA ligase OS=Homo sapiens OX=9606 GN=KAR         | 15.68761468 |
| High | O60610 | Protein diaphanous homolog 1 OS=Homo sapiens OX=96         | 15.65657765 |
| High | P31040 | Succinate dehydrogenase [ubiquinone] flavoprotein subu     | 15.5999288  |
| High | P61224 | Ras-related protein Rap-1b OS=Homo sapiens OX=9606 C       | 15.54225006 |
| High | Q8NBF2 | NHL repeat-containing protein 2 OS=Homo sapiens OX=9       | 15.47801989 |
| High | P36873 | Serine/threonine-protein phosphatase PP1-gamma catal       | 15.46370047 |
| High | P62136 | Serine/threonine-protein phosphatase PP1-alpha catalyt     | 15.4182732  |
| High | P63010 | AP-2 complex subunit beta OS=Homo sapiens OX=9606 C        | 15.41773571 |
| High | P42345 | Serine/threonine-protein kinase mTOR OS=Homo sapien        | 15.37939671 |

|      |           |                                                              |             |
|------|-----------|--------------------------------------------------------------|-------------|
| High | P12814    | Alpha-actinin-1 OS=Homo sapiens OX=9606 GN=ACTN1 F           | 15.34075874 |
| High | Q15042    | Rab3 GTPase-activating protein catalytic subunit OS=Hor      | 15.33383434 |
| High | Q7L576    | Cytoplasmic FMR1-interacting protein 1 OS=Homo sapie         | 15.26865725 |
| High | Q86UP2    | Kinectin OS=Homo sapiens OX=9606 GN=KTN1 PE=1 SV=            | 15.10908972 |
| High | P10586    | Receptor-type tyrosine-protein phosphatase F OS=Homoc        | 14.98741093 |
| High | Q7Z2W4    | Zinc finger CCCH-type antiviral protein 1 OS=Homo sapie      | 14.82183357 |
| High | Q7Z2T5    | TRMT1-like protein OS=Homo sapiens OX=9606 GN=TRM            | 14.80841317 |
| High | Q2NL82    | Pre-rRNA-processing protein TSR1 homolog OS=Homo sa          | 14.77134219 |
| High | P61221    | ATP-binding cassette sub-family E member 1 OS=Homo s         | 14.66828759 |
| High | P55084    | Trifunctional enzyme subunit beta, mitochondrial OS=Ho       | 14.66232444 |
| High | Q07020    | 60S ribosomal protein L18 OS=Homo sapiens OX=9606 G          | 14.66144552 |
| High | Q00325    | Phosphate carrier protein, mitochondrial OS=Homo sapie       | 14.64951953 |
| High | P39748    | Flap endonuclease 1 OS=Homo sapiens OX=9606 GN=FEI           | 14.64313647 |
| High | P40938    | Replication factor C subunit 3 OS=Homo sapiens OX=960        | 14.5831245  |
| High | O43242    | 26S proteasome non-ATPase regulatory subunit 3 OS=Ho         | 14.47510165 |
| High | P62333    | 26S proteasome regulatory subunit 10B OS=Homo sapie          | 14.46421796 |
| High | Q7L014    | Probable ATP-dependent RNA helicase DDX46 OS=Homo            | 14.46320998 |
| High | Q02978    | Mitochondrial 2-oxoglutarate/malate carrier protein OS=      | 14.45781446 |
| High | P62277    | 40S ribosomal protein S13 OS=Homo sapiens OX=9606 G          | 14.4304064  |
| High | Q15907    | Ras-related protein Rab-11B OS=Homo sapiens OX=9606          | 14.39758476 |
| High | P49321    | Nuclear autoantigenic sperm protein OS=Homo sapiens (        | 14.22989848 |
| High | P12532    | Creatine kinase U-type, mitochondrial OS=Homo sapiens        | 14.20019004 |
| High | Q9Y3Z3    | Deoxynucleoside triphosphate triphosphohydrolase SAM         | 14.17101206 |
| High | P30041    | Peroxiredoxin-6 OS=Homo sapiens OX=9606 GN=PRDX6             | 14.07701211 |
| High | Q9ULX6    | A-kinase anchor protein 8-like OS=Homo sapiens OX=960        | 14.06331641 |
| High | O95757    | Heat shock 70 kDa protein 4L OS=Homo sapiens OX=960          | 14.01854213 |
| High | P53985    | Monocarboxylate transporter 1 OS=Homo sapiens OX=960         | 13.99075976 |
| High | P48147    | Prolyl endopeptidase OS=Homo sapiens OX=9606 GN=PF           | 13.97006267 |
| High | O75122    | CLIP-associating protein 2 OS=Homo sapiens OX=9606 G         | 13.83769885 |
| High | Q9HB07    | UPF0160 protein MYG1, mitochondrial OS=Homo sapien           | 13.83116123 |
| High | Q9Y6D9    | Mitotic spindle assembly checkpoint protein MAD1 OS=H        | 13.77983809 |
| High | Q96124    | Far upstream element-binding protein 3 OS=Homo sapie         | 13.73415907 |
| High | O75477    | Erlin-1 OS=Homo sapiens OX=9606 GN=ERLIN1 PE=1 SV=           | 13.62571113 |
| High | Q14558    | Phosphoribosyl pyrophosphate synthase-associated prot        | 13.53333255 |
| High | Q9H3S7    | Tyrosine-protein phosphatase non-receptor type 23 OS=        | 13.49893171 |
| High | P10768    | S-formylglutathione hydrolase OS=Homo sapiens OX=960         | 13.39105067 |
| High | B5ME19    | Eukaryotic translation initiation factor 3 subunit C-like pr | 13.37951857 |
| High | P07741    | Adenine phosphoribosyltransferase OS=Homo sapiens O          | 13.32124454 |
| High | P20020    | Plasma membrane calcium-transporting ATPase 1 OS=Ho          | 13.1356842  |
| High | A0A075B6S | Immunoglobulin kappa variable 2D-29 OS=Homo sapiens          | 13.10233218 |
| High | O15084    | Serine/threonine-protein phosphatase 6 regulatory anky       | 13.08449104 |
| High | O14981    | TATA-binding protein-associated factor 172 OS=Homo sa        | 13.05703962 |
| High | O60814    | Histone H2B type 1-K OS=Homo sapiens OX=9606 GN=HI           | 13.0256319  |
| High | O14744    | Protein arginine N-methyltransferase 5 OS=Homo sapien        | 12.99963182 |
| High | P42566    | Epidermal growth factor receptor substrate 15 OS=Homoc       | 12.95406182 |
| High | Q9NUQ8    | ATP-binding cassette sub-family F member 3 OS=Homo s         | 12.95346561 |
| High | P38117    | Electron transfer flavoprotein subunit beta OS=Homo sa       | 12.9264991  |

|      |           |                                                                                                                 |             |
|------|-----------|-----------------------------------------------------------------------------------------------------------------|-------------|
| High | O00425    | Insulin-like growth factor 2 mRNA-binding protein 3 OS=Homo sapiens OX=9606 GN=IGFBP3 PE=1 SV=1                 | 12.88161299 |
| High | Q8IZL8    | Proline-, glutamic acid- and leucine-rich protein 1 OS=Homo sapiens OX=9606 GN=PLGL1 PE=1 SV=1                  | 12.8410432  |
| High | Q8TAT6    | Nuclear protein localization protein 4 homolog OS=Homo sapiens OX=9606 GN=NPL4 PE=1 SV=1                        | 12.73944804 |
| High | P61981    | 14-3-3 protein gamma OS=Homo sapiens OX=9606 GN=1433G PE=1 SV=1                                                 | 12.73570406 |
| High | A0A1B0GTU | Zinc finger CCCH domain-containing protein 11B OS=Homo sapiens OX=9606 GN=ZFP111B PE=1 SV=1                     | 12.71896819 |
| High | Q96ST3    | Paired amphipathic helix protein Sin3a OS=Homo sapiens OX=9606 GN=SI3A PE=1 SV=1                                | 12.69126306 |
| High | Q99829    | Copine-1 OS=Homo sapiens OX=9606 GN=CPNE1 PE=1 SV=1                                                             | 12.68688375 |
| High | P31946    | 14-3-3 protein beta/alpha OS=Homo sapiens OX=9606 GN=1433B PE=1 SV=1                                            | 12.67994775 |
| High | Q9Y4C2    | TRPM8 channel-associated factor 1 OS=Homo sapiens OX=9606 GN=TRAF8 PE=1 SV=1                                    | 12.67896453 |
| High | P29401    | Transketolase OS=Homo sapiens OX=9606 GN=TKT PE=1 SV=1                                                          | 12.67464881 |
| High | Q9UQ80    | Proliferation-associated protein 2G4 OS=Homo sapiens OX=9606 GN=PA2G4 PE=1 SV=1                                 | 12.66860122 |
| High | O43776    | Asparagine--tRNA ligase, cytoplasmic OS=Homo sapiens OX=9606 GN=ASPL1 PE=1 SV=1                                 | 12.65137879 |
| High | P06730    | Eukaryotic translation initiation factor 4E OS=Homo sapiens OX=9606 GN=EIF4 PE=1 SV=1                           | 12.62051384 |
| High | Q9C0C7    | Activating molecule in BECN1-regulated autophagy protein 1 OS=Homo sapiens OX=9606 GN=AMBRA1 PE=1 SV=1          | 12.58251711 |
| High | P12004    | Proliferating cell nuclear antigen OS=Homo sapiens OX=9606 GN=PCNA PE=1 SV=1                                    | 12.56535246 |
| High | O43719    | HIV Tat-specific factor 1 OS=Homo sapiens OX=9606 GN=HIV1_TSF1 PE=1 SV=1                                        | 12.54960816 |
| High | Q12905    | Interleukin enhancer-binding factor 2 OS=Homo sapiens OX=9606 GN=IL23R PE=1 SV=1                                | 12.51876811 |
| High | P46783    | 40S ribosomal protein S10 OS=Homo sapiens OX=9606 GN=RS10 PE=1 SV=1                                             | 12.50967323 |
| High | Q5JPE7    | Nodal modulator 2 OS=Homo sapiens OX=9606 GN=NOM2 PE=1 SV=1                                                     | 12.47391774 |
| High | P61006    | Ras-related protein Rab-8A OS=Homo sapiens OX=9606 GN=RAB8A PE=1 SV=1                                           | 12.46952741 |
| High | Q9NRZ9    | Lymphoid-specific helicase OS=Homo sapiens OX=9606 GN=LSH PE=1 SV=1                                             | 12.46815675 |
| High | O43264    | Centromere/kinetochore protein zw10 homolog OS=Homo sapiens OX=9606 GN=ZW10 PE=1 SV=1                           | 12.46368521 |
| High | Q9Y5P6    | Mannose-1-phosphate guanyltransferase beta OS=Homo sapiens OX=9606 GN=M1G2B PE=1 SV=1                           | 12.45426807 |
| High | Q5H9R7    | Serine/threonine-protein phosphatase 6 regulatory subunit 1 OS=Homo sapiens OX=9606 GN=PPP6R1 PE=1 SV=1         | 12.37674987 |
| High | P05198    | Eukaryotic translation initiation factor 2 subunit 1 OS=Homo sapiens OX=9606 GN=EIF2S1 PE=1 SV=1                | 12.34512126 |
| High | O75131    | Copine-3 OS=Homo sapiens OX=9606 GN=CPNE3 PE=1 SV=1                                                             | 12.30724787 |
| High | Q9UBB4    | Ataxin-10 OS=Homo sapiens OX=9606 GN=ATXN10 PE=1 SV=1                                                           | 12.29855564 |
| High | Q9BWH6    | RNA polymerase II-associated protein 1 OS=Homo sapiens OX=9606 GN=RPA1 PE=1 SV=1                                | 12.29637681 |
| High | Q9NT62    | Ubiquitin-like-conjugating enzyme ATG3 OS=Homo sapiens OX=9606 GN=ATG3 PE=1 SV=1                                | 12.19952003 |
| High | P00403    | Cytochrome c oxidase subunit 2 OS=Homo sapiens OX=9606 GN=COX2 PE=1 SV=1                                        | 12.16559272 |
| High | P10253    | Lysosomal alpha-glucosidase OS=Homo sapiens OX=9606 GN=GLA PE=1 SV=1                                            | 12.15497077 |
| High | Q02543    | 60S ribosomal protein L18a OS=Homo sapiens OX=9606 GN=RL18A PE=1 SV=1                                           | 12.08355526 |
| High | P31942    | Heterogeneous nuclear ribonucleoprotein H3 OS=Homo sapiens OX=9606 GN=HNRH3 PE=1 SV=1                           | 12.0800356  |
| High | Q13155    | Aminoacyl tRNA synthase complex-interacting multifunctional protein 1 OS=Homo sapiens OX=9606 GN=AIM1 PE=1 SV=1 | 12.07049917 |
| High | Q14139    | Ubiquitin conjugation factor E4 A OS=Homo sapiens OX=9606 GN=UBCH4A PE=1 SV=1                                   | 12.06555303 |
| High | P14923    | Junction plakoglobin OS=Homo sapiens OX=9606 GN=JUP PE=1 SV=1                                                   | 12.03014522 |
| High | Q14839    | Chromodomain-helicase-DNA-binding protein 4 OS=Homo sapiens OX=9606 GN=CHD4 PE=1 SV=1                           | 12.02340772 |
| High | Q9NS69    | Mitochondrial import receptor subunit TOM22 homolog OS=Homo sapiens OX=9606 GN=TIM22 PE=1 SV=1                  | 11.9667196  |
| High | Q9Y2J2    | Band 4.1-like protein 3 OS=Homo sapiens OX=9606 GN=BLP3 PE=1 SV=1                                               | 11.92723724 |
| High | Q9Y450    | HBS1-like protein OS=Homo sapiens OX=9606 GN=HBS1L PE=1 SV=1                                                    | 11.77438853 |
| High | Q9BXW6    | Oxysterol-binding protein-related protein 1 OS=Homo sapiens OX=9606 GN=ORP1L PE=1 SV=1                          | 11.67503879 |
| High | Q9Y4E8    | Ubiquitin carboxyl-terminal hydrolase 15 OS=Homo sapiens OX=9606 GN=UBCH15 PE=1 SV=1                            | 11.6402273  |
| High | Q7LBC6    | Lysine-specific demethylase 3B OS=Homo sapiens OX=9606 GN=KDM3B PE=1 SV=1                                       | 11.60770094 |
| High | Q99700    | Ataxin-2 OS=Homo sapiens OX=9606 GN=ATXN2 PE=1 SV=1                                                             | 11.5090235  |
| High | Q9UHD8    | Septin-9 OS=Homo sapiens OX=9606 GN=SEPT9 PE=1 SV=1                                                             | 11.37509136 |
| High | Q13045    | Protein flightless-1 homolog OS=Homo sapiens OX=9606 GN=FLRT1L PE=1 SV=1                                        | 11.36402078 |
| High | Q6PI48    | Aspartate--tRNA ligase, mitochondrial OS=Homo sapiens OX=9606 GN=ASPL2 PE=1 SV=1                                | 11.31697233 |

|      |        |                                                                                                                            |             |
|------|--------|----------------------------------------------------------------------------------------------------------------------------|-------------|
| High | P07355 | Annexin A2 OS=Homo sapiens OX=9606 GN=ANXA2 PE=1 SV=3                                                                      | 11.28259017 |
| High | Q04323 | UBX domain-containing protein 1 OS=Homo sapiens OX=9606 GN=UBX1 PE=1 SV=3                                                  | 11.17826728 |
| High | Q96RG2 | PAS domain-containing serine/threonine-protein kinase OS=Homo sapiens OX=9606 GN=KIF20B PE=1 SV=3                          | 11.17145534 |
| High | Q1KMD3 | Heterogeneous nuclear ribonucleoprotein U-like protein OS=Homo sapiens OX=9606 GN=HNRU1 PE=1 SV=3                          | 11.16477294 |
| High | Q16576 | Histone-binding protein RBBP7 OS=Homo sapiens OX=9606 GN=RBBP7 PE=1 SV=3                                                   | 11.15409609 |
| High | Q9NY33 | Dipeptidyl peptidase 3 OS=Homo sapiens OX=9606 GN=CDP3 PE=1 SV=3                                                           | 11.13927814 |
| High | P68400 | Casein kinase II subunit alpha OS=Homo sapiens OX=9606 GN=CK2A1 PE=1 SV=3                                                  | 11.02258133 |
| High | Q8NG31 | Kinetochores scaffold 1 OS=Homo sapiens OX=9606 GN=KIF20B PE=1 SV=3                                                        | 10.97186859 |
| High | Q8NI27 | THO complex subunit 2 OS=Homo sapiens OX=9606 GN=THO2 PE=1 SV=3                                                            | 10.94556344 |
| High | Q14739 | Lamin-B receptor OS=Homo sapiens OX=9606 GN=LBR PE=1 SV=3                                                                  | 10.93683435 |
| High | P35573 | Glycogen debranching enzyme OS=Homo sapiens OX=9606 GN=GBD1 PE=1 SV=3                                                      | 10.926902   |
| High | O43252 | Bifunctional 3'-phosphoadenosine 5'-phosphosulfate synthase OS=Homo sapiens OX=9606 GN=PPS1 PE=1 SV=3                      | 10.92237768 |
| High | Q99956 | Dual specificity protein phosphatase 9 OS=Homo sapiens OX=9606 GN=PPP2R9 PE=1 SV=3                                         | 10.9214599  |
| High | Q13409 | Cytoplasmic dynein 1 intermediate chain 2 OS=Homo sapiens OX=9606 GN=DYNC1I2 PE=1 SV=3                                     | 10.9050651  |
| High | Q9Y2A7 | Nck-associated protein 1 OS=Homo sapiens OX=9606 GN=NCK1 PE=1 SV=3                                                         | 10.86134862 |
| High | Q13576 | Ras GTPase-activating-like protein IQGAP2 OS=Homo sapiens OX=9606 GN=IQGAP2 PE=1 SV=3                                      | 10.83177103 |
| High | P62241 | 40S ribosomal protein S8 OS=Homo sapiens OX=9606 GN=PS8 PE=1 SV=3                                                          | 10.82466968 |
| High | Q96CW5 | Gamma-tubulin complex component 3 OS=Homo sapiens OX=9606 GN=GCC3 PE=1 SV=3                                                | 10.75395538 |
| High | Q6Y7W6 | GRB10-interacting GYF protein 2 OS=Homo sapiens OX=9606 GN=GYF2 PE=1 SV=3                                                  | 10.72043964 |
| High | Q9NPI6 | mRNA-decapping enzyme 1A OS=Homo sapiens OX=9606 GN=DCP1A PE=1 SV=3                                                        | 10.71215033 |
| High | O75955 | Flotillin-1 OS=Homo sapiens OX=9606 GN=FLOT1 PE=1 SV=3                                                                     | 10.6343419  |
| High | O75306 | NADH dehydrogenase [ubiquinone] iron-sulfur protein 2, mitochondrial OS=Homo sapiens OX=9606 GN=ND2 PE=1 SV=3              | 10.59021506 |
| High | P48047 | ATP synthase subunit O, mitochondrial OS=Homo sapiens OX=9606 GN=ATP8B PE=1 SV=3                                           | 10.54899815 |
| High | P00387 | NADH-cytochrome b5 reductase 3 OS=Homo sapiens OX=9606 GN=NDR3 PE=1 SV=3                                                   | 10.51753376 |
| High | Q96AG4 | Leucine-rich repeat-containing protein 59 OS=Homo sapiens OX=9606 GN=LRR59 PE=1 SV=3                                       | 10.43792581 |
| High | O43290 | U4/U6.U5 tri-snRNP-associated protein 1 OS=Homo sapiens OX=9606 GN=UAP1 PE=1 SV=3                                          | 10.43383    |
| High | O75179 | Ankyrin repeat domain-containing protein 17 OS=Homo sapiens OX=9606 GN=ANKRD17 PE=1 SV=3                                   | 10.405629   |
| High | Q96HY7 | Probable 2-oxoglutarate dehydrogenase E1 component 1 OS=Homo sapiens OX=9606 GN=OGDH1 PE=1 SV=3                            | 10.40104677 |
| High | Q8WUM0 | Nuclear pore complex protein Nup133 OS=Homo sapiens OX=9606 GN=NUP133 PE=1 SV=3                                            | 10.38625005 |
| High | P54709 | Sodium/potassium-transporting ATPase subunit beta-3 C OS=Homo sapiens OX=9606 GN=ATP1B3 PE=1 SV=3                          | 10.38552322 |
| High | Q07666 | KH domain-containing, RNA-binding, signal transduction-activating protein 1 OS=Homo sapiens OX=9606 GN=KAP1 PE=1 SV=3      | 10.38034989 |
| High | P62714 | Serine/threonine-protein phosphatase 2A catalytic subunit OS=Homo sapiens OX=9606 GN=PPP2R2A PE=1 SV=3                     | 10.33601837 |
| High | P24534 | Elongation factor 1-beta OS=Homo sapiens OX=9606 GN=EF1B1 PE=1 SV=3                                                        | 10.32150028 |
| High | Q96EK7 | Constitutive coactivator of peroxisome proliferator-activated receptor gamma OS=Homo sapiens OX=9606 GN=PPARGC1A PE=1 SV=3 | 10.30009633 |
| High | P29992 | Guanine nucleotide-binding protein subunit alpha-11 OS=Homo sapiens OX=9606 GN=GNAS1 PE=1 SV=3                             | 10.28029798 |
| High | O75874 | Isocitrate dehydrogenase [NADP] cytoplasmic OS=Homo sapiens OX=9606 GN=IDH3C PE=1 SV=3                                     | 10.27830455 |
| High | Q15738 | Sterol-4-alpha-carboxylate 3-dehydrogenase, decarboxylating OS=Homo sapiens OX=9606 GN=SCD5 PE=1 SV=3                      | 10.23170767 |
| High | P84103 | Serine/arginine-rich splicing factor 3 OS=Homo sapiens OX=9606 GN=SRF3 PE=1 SV=3                                           | 10.21697357 |
| High | O95671 | N-acetylserotonin O-methyltransferase-like protein OS=Homo sapiens OX=9606 GN=NSMTL PE=1 SV=3                              | 10.205654   |
| High | P84098 | 60S ribosomal protein L19 OS=Homo sapiens OX=9606 GN=PSL19 PE=1 SV=3                                                       | 10.16031786 |
| High | P50750 | Cyclin-dependent kinase 9 OS=Homo sapiens OX=9606 GN=CDK9 PE=1 SV=3                                                        | 10.13904362 |
| High | P14735 | Insulin-degrading enzyme OS=Homo sapiens OX=9606 GN=IDE PE=1 SV=3                                                          | 10.1381549  |
| High | P46087 | Probable 28S rRNA (cytosine(4447)-C(5))-methyltransferase OS=Homo sapiens OX=9606 GN=NSM2 PE=1 SV=3                        | 10.06302309 |
| High | P55196 | Afadin OS=Homo sapiens OX=9606 GN=AFDN PE=1 SV=3                                                                           | 10.05620783 |
| High | Q96FW1 | Ubiquitin thioesterase OTUB1 OS=Homo sapiens OX=9606 GN=OTUB1 PE=1 SV=3                                                    | 10.04203389 |
| High | O60343 | TBC1 domain family member 4 OS=Homo sapiens OX=9606 GN=TBC1D4 PE=1 SV=3                                                    | 10.03796421 |
| High | Q7Z4H7 | HAUS augmin-like complex subunit 6 OS=Homo sapiens OX=9606 GN=HAUS6 PE=1 SV=3                                              | 10.03011821 |

|      |        |                                                                                        |             |
|------|--------|----------------------------------------------------------------------------------------|-------------|
| High | Q9Y2D5 | A-kinase anchor protein 2 OS=Homo sapiens OX=9606 GN=                                  | 10.00648664 |
| High | P83731 | 60S ribosomal protein L24 OS=Homo sapiens OX=9606 GN=                                  | 9.995950086 |
| High | P62750 | 60S ribosomal protein L23a OS=Homo sapiens OX=9606 GN=                                 | 9.968050001 |
| High | P62899 | 60S ribosomal protein L31 OS=Homo sapiens OX=9606 GN=                                  | 9.923918308 |
| High | Q9UNM6 | 26S proteasome non-ATPase regulatory subunit 13 OS=Homo sapiens OX=9606 GN=            | 9.899040184 |
| High | P62258 | 14-3-3 protein epsilon OS=Homo sapiens OX=9606 GN=Y                                    | 9.855240236 |
| High | Q9BSD7 | Cancer-related nucleoside-triphosphatase OS=Homo sapiens OX=9606 GN=                   | 9.849411183 |
| High | Q13724 | Mannosyl-oligosaccharide glucosidase OS=Homo sapiens OX=9606 GN=                       | 9.847753711 |
| High | Q7Z5L2 | Coiled-coil domain-containing protein R3HCC1L OS=Homo sapiens OX=9606 GN=              | 9.845576027 |
| High | O95239 | Chromosome-associated kinesin KIF4A OS=Homo sapiens OX=9606 GN=                        | 9.786046412 |
| High | Q9NVE7 | Pantothenate kinase 4 OS=Homo sapiens OX=9606 GN=F                                     | 9.749937545 |
| High | O60547 | GDP-mannose 4,6 dehydratase OS=Homo sapiens OX=9606 GN=                                | 9.720085273 |
| High | P34949 | Mannose-6-phosphate isomerase OS=Homo sapiens OX=9606 GN=                              | 9.697589407 |
| High | Q13596 | Sorting nexin-1 OS=Homo sapiens OX=9606 GN=SNX1 PE=1 SV=1                              | 9.655858192 |
| High | Q13151 | Heterogeneous nuclear ribonucleoprotein A0 OS=Homo sapiens OX=9606 GN=                 | 9.633832091 |
| High | O14802 | DNA-directed RNA polymerase III subunit RPC1 OS=Homo sapiens OX=9606 GN=               | 9.61019693  |
| High | Q8N3U4 | Cohesin subunit SA-2 OS=Homo sapiens OX=9606 GN=ST                                     | 9.593686194 |
| High | Q9BQA1 | Methylosome protein 50 OS=Homo sapiens OX=9606 GN=                                     | 9.58990334  |
| High | O75821 | Eukaryotic translation initiation factor 3 subunit G OS=Homo sapiens OX=9606 GN=       | 9.575403866 |
| High | Q14157 | Ubiquitin-associated protein 2-like OS=Homo sapiens OX=9606 GN=                        | 9.559804651 |
| High | Q9UJS0 | Calcium-binding mitochondrial carrier protein Aralar2 OS=Homo sapiens OX=9606 GN=      | 9.557231842 |
| High | Q9NRN7 | L-aminoacidipate-semialdehyde dehydrogenase-phosphorylated OS=Homo sapiens OX=9606 GN= | 9.540733054 |
| High | P62829 | 60S ribosomal protein L23 OS=Homo sapiens OX=9606 GN=                                  | 9.451651863 |
| High | Q9HC07 | Transmembrane protein 165 OS=Homo sapiens OX=9606 GN=                                  | 9.43944579  |
| High | P21127 | Cyclin-dependent kinase 11B OS=Homo sapiens OX=9606 GN=                                | 9.352877854 |
| High | P56134 | ATP synthase subunit f, mitochondrial OS=Homo sapiens OX=9606 GN=                      | 9.314435687 |
| High | O00264 | Membrane-associated progesterone receptor component 1 OS=Homo sapiens OX=9606 GN=      | 9.312036286 |
| High | P17980 | 26S proteasome regulatory subunit 6A OS=Homo sapiens OX=9606 GN=                       | 9.302132862 |
| High | P60174 | Triosephosphate isomerase OS=Homo sapiens OX=9606 GN=                                  | 9.291517798 |
| High | Q96EP5 | DAZ-associated protein 1 OS=Homo sapiens OX=9606 GN=                                   | 9.276070065 |
| High | Q13617 | Cullin-2 OS=Homo sapiens OX=9606 GN=CUL2 PE=1 SV=2                                     | 9.253068096 |
| High | Q9UKG1 | DCC-interacting protein 13-alpha OS=Homo sapiens OX=9606 GN=                           | 9.214902624 |
| High | Q9UBT2 | SUMO-activating enzyme subunit 2 OS=Homo sapiens OX=9606 GN=                           | 9.203554379 |
| High | O14979 | Heterogeneous nuclear ribonucleoprotein D-like OS=Homo sapiens OX=9606 GN=             | 9.199425987 |
| High | P30050 | 60S ribosomal protein L12 OS=Homo sapiens OX=9606 GN=                                  | 9.137957636 |
| High | P51659 | Peroxisomal multifunctional enzyme type 2 OS=Homo sapiens OX=9606 GN=                  | 9.100362443 |
| High | O60841 | Eukaryotic translation initiation factor 5B OS=Homo sapiens OX=9606 GN=                | 9.077514634 |
| High | P36871 | Phosphoglucomutase-1 OS=Homo sapiens OX=9606 GN=                                       | 9.009452862 |
| High | Q96T37 | RNA-binding protein 15 OS=Homo sapiens OX=9606 GN=                                     | 8.992303344 |
| High | Q13162 | Peroxiredoxin-4 OS=Homo sapiens OX=9606 GN=PRDX4                                       | 8.974532643 |
| High | P35241 | Radixin OS=Homo sapiens OX=9606 GN=RDY PE=1 SV=1                                       | 8.971029821 |
| High | P25786 | Proteasome subunit alpha type-1 OS=Homo sapiens OX=9606 GN=                            | 8.951760849 |
| High | Q86WJ1 | Chromodomain-helicase-DNA-binding protein 1-like OS=Homo sapiens OX=9606 GN=           | 8.944152454 |
| High | P25325 | 3-mercaptopyruvate sulfurtransferase OS=Homo sapiens OX=9606 GN=                       | 8.910833287 |
| High | Q9H6E5 | Speckle targeted PIP5K1A-regulated poly(A) polymerase OS=Homo sapiens OX=9606 GN=      | 8.883666964 |
| High | Q92878 | DNA repair protein RAD50 OS=Homo sapiens OX=9606 GN=                                   | 8.883441844 |
| High | Q9C0C2 | 182 kDa tankyrase-1-binding protein OS=Homo sapiens OX=9606 GN=                        | 8.883311481 |

|      |        |                                                                                                             |             |
|------|--------|-------------------------------------------------------------------------------------------------------------|-------------|
| High | P50402 | Emerin OS=Homo sapiens OX=9606 GN=EMD PE=1 SV=1                                                             | 8.822130844 |
| High | O60488 | Long-chain-fatty-acid--CoA ligase 4 OS=Homo sapiens OX=9606 GN=ACLY PE=1 SV=1                               | 8.775447417 |
| High | Q14103 | Heterogeneous nuclear ribonucleoprotein D0 OS=Homo sapiens OX=9606 GN=HNRD0 PE=1 SV=1                       | 8.773705791 |
| High | Q5VTR2 | E3 ubiquitin-protein ligase BRE1A OS=Homo sapiens OX=9606 GN=BRE1A PE=1 SV=1                                | 8.7446749   |
| High | Q5D862 | Filaggrin-2 OS=Homo sapiens OX=9606 GN=FLG2 PE=1 SV=1                                                       | 8.744133781 |
| High | P0DN79 | Cystathionine beta-synthase-like protein OS=Homo sapiens OX=9606 GN=CBSL1 PE=1 SV=1                         | 8.742095271 |
| High | Q8IWZ3 | Ankyrin repeat and KH domain-containing protein 1 OS=Homo sapiens OX=9606 GN=ANKK1 PE=1 SV=1                | 8.73184456  |
| High | Q9UKF6 | Cleavage and polyadenylation specificity factor subunit 3 OS=Homo sapiens OX=9606 GN=CPSF3 PE=1 SV=1        | 8.7202538   |
| High | Q92889 | DNA repair endonuclease XPF OS=Homo sapiens OX=9606 GN=XPF PE=1 SV=1                                        | 8.690652216 |
| High | Q7Z2Z2 | Elongation factor-like GTPase 1 OS=Homo sapiens OX=9606 GN=ELF1 PE=1 SV=1                                   | 8.684204544 |
| High | Q96FC9 | ATP-dependent DNA helicase DDX11 OS=Homo sapiens OX=9606 GN=DDX11 PE=1 SV=1                                 | 8.641734232 |
| High | Q68EM7 | Rho GTPase-activating protein 17 OS=Homo sapiens OX=9606 GN=RAP17 PE=1 SV=1                                 | 8.641611124 |
| High | Q6P2E9 | Enhancer of mRNA-decapping protein 4 OS=Homo sapiens OX=9606 GN=ELDC4 PE=1 SV=1                             | 8.64021426  |
| High | O75146 | Huntingtin-interacting protein 1-related protein OS=Homo sapiens OX=9606 GN=HIP1R PE=1 SV=1                 | 8.625735695 |
| High | Q07955 | Serine/arginine-rich splicing factor 1 OS=Homo sapiens OX=9606 GN=SRF1 PE=1 SV=1                            | 8.597065305 |
| High | P11233 | Ras-related protein Ral-A OS=Homo sapiens OX=9606 GN=RALGAPB PE=1 SV=1                                      | 8.597000431 |
| High | O15479 | Melanoma-associated antigen B2 OS=Homo sapiens OX=9606 GN=MAB2 PE=1 SV=1                                    | 8.589077037 |
| High | O94973 | AP-2 complex subunit alpha-2 OS=Homo sapiens OX=9606 GN=AP2A2 PE=1 SV=1                                     | 8.550208967 |
| High | Q96AE4 | Far upstream element-binding protein 1 OS=Homo sapiens OX=9606 GN=FEA1 PE=1 SV=1                            | 8.538253059 |
| High | P62917 | 60S ribosomal protein L8 OS=Homo sapiens OX=9606 GN=RPL8 PE=1 SV=1                                          | 8.515238359 |
| High | P31689 | DnaJ homolog subfamily A member 1 OS=Homo sapiens OX=9606 GN=DNAJA1 PE=1 SV=1                               | 8.490389728 |
| High | Q96KG9 | N-terminal kinase-like protein OS=Homo sapiens OX=9606 GN=NKAIN PE=1 SV=1                                   | 8.449512371 |
| High | P46977 | Dolichyl-diphosphooligosaccharide--protein glycosyltransferase 1 OS=Homo sapiens OX=9606 GN=DOLY1 PE=1 SV=1 | 8.428122485 |
| High | P32119 | Peroxiredoxin-2 OS=Homo sapiens OX=9606 GN=PRDX2 PE=1 SV=1                                                  | 8.4202055   |
| High | P36915 | Guanine nucleotide-binding protein-like 1 OS=Homo sapiens OX=9606 GN=GNB1L PE=1 SV=1                        | 8.409576406 |
| High | Q9UBV2 | Protein sel-1 homolog 1 OS=Homo sapiens OX=9606 GN=SEL1L PE=1 SV=1                                          | 8.310107101 |
| High | P43304 | Glycerol-3-phosphate dehydrogenase, mitochondrial OS=Homo sapiens OX=9606 GN=GDH3 PE=1 SV=1                 | 8.272653162 |
| High | Q9Y5M8 | Signal recognition particle receptor subunit beta OS=Homo sapiens OX=9606 GN=SRPB PE=1 SV=1                 | 8.23283605  |
| High | Q9NZ01 | Very-long-chain enoyl-CoA reductase OS=Homo sapiens OX=9606 GN=ENR1 PE=1 SV=1                               | 8.211516513 |
| High | P13489 | Ribonuclease inhibitor OS=Homo sapiens OX=9606 GN=RIBI PE=1 SV=1                                            | 8.198144941 |
| High | P63241 | Eukaryotic translation initiation factor 5A-1 OS=Homo sapiens OX=9606 GN=EIF5A1 PE=1 SV=1                   | 8.197888353 |
| High | P39656 | Dolichyl-diphosphooligosaccharide--protein glycosyltransferase 2 OS=Homo sapiens OX=9606 GN=DOLY2 PE=1 SV=1 | 8.15479406  |
| High | Q15717 | ELAV-like protein 1 OS=Homo sapiens OX=9606 GN=ELAVL1 PE=1 SV=1                                             | 8.145120643 |
| High | Q9NVH2 | Integrator complex subunit 7 OS=Homo sapiens OX=9606 GN=INTS7 PE=1 SV=1                                     | 8.134904131 |
| High | P27348 | 14-3-3 protein theta OS=Homo sapiens OX=9606 GN=YWHA4 PE=1 SV=1                                             | 8.128998985 |
| High | Q8IXB1 | DnaJ homolog subfamily C member 10 OS=Homo sapiens OX=9606 GN=DNAJA10 PE=1 SV=1                             | 8.078654645 |
| High | Q86XL3 | Ankyrin repeat and LEM domain-containing protein 2 OS=Homo sapiens OX=9606 GN=ANKL2 PE=1 SV=1               | 8.053697013 |
| High | Q9NR45 | Sialic acid synthase OS=Homo sapiens OX=9606 GN=NANS PE=1 SV=1                                              | 8.039670522 |
| High | Q16630 | Cleavage and polyadenylation specificity factor subunit 6 OS=Homo sapiens OX=9606 GN=CPSF6 PE=1 SV=1        | 8.032866299 |
| High | O15355 | Protein phosphatase 1G OS=Homo sapiens OX=9606 GN=PPP1R1B PE=1 SV=1                                         | 8.02543544  |
| High | P00505 | Aspartate aminotransferase, mitochondrial OS=Homo sapiens OX=9606 GN=ASPM PE=1 SV=1                         | 8.006379685 |
| High | O43747 | AP-1 complex subunit gamma-1 OS=Homo sapiens OX=9606 GN=AP1G1 PE=1 SV=1                                     | 7.942366596 |
| High | P05783 | Keratin, type I cytoskeletal 18 OS=Homo sapiens OX=9606 GN=KRT18 PE=1 SV=1                                  | 7.934830828 |
| High | P46781 | 40S ribosomal protein S9 OS=Homo sapiens OX=9606 GN=RPS9 PE=1 SV=1                                          | 7.895468349 |
| High | Q8WXF1 | Paraspeckle component 1 OS=Homo sapiens OX=9606 GN=PCOMP1 PE=1 SV=1                                         | 7.889253034 |
| High | Q9UDR5 | Alpha-aminoacidic semialdehyde synthase, mitochondrial OS=Homo sapiens OX=9606 GN=ALAS1 PE=1 SV=1           | 7.881328293 |
| High | P46777 | 60S ribosomal protein L5 OS=Homo sapiens OX=9606 GN=RPL5 PE=1 SV=1                                          | 7.783076262 |

|      |        |                                                            |             |
|------|--------|------------------------------------------------------------|-------------|
| High | Q9Y223 | Bifunctional UDP-N-acetylglucosamine 2-epimerase/N-ac      | 7.716438892 |
| High | Q14444 | Caprin-1 OS=Homo sapiens OX=9606 GN=CAPRIN1 PE=1           | 7.703307039 |
| High | Q8TC07 | TBC1 domain family member 15 OS=Homo sapiens OX=9          | 7.690448931 |
| High | Q9UPY3 | Endoribonuclease Dicer OS=Homo sapiens OX=9606 GN=         | 7.689859198 |
| High | P00492 | Hypoxanthine-guanine phosphoribosyltransferase OS=Ho       | 7.679860113 |
| High | Q9UH99 | SUN domain-containing protein 2 OS=Homo sapiens OX=        | 7.61506481  |
| High | P28161 | Glutathione S-transferase Mu 2 OS=Homo sapiens OX=96       | 7.598969111 |
| High | Q96CX2 | BTB/POZ domain-containing protein KCTD12 OS=Homo s         | 7.537917354 |
| High | Q04917 | 14-3-3 protein eta OS=Homo sapiens OX=9606 GN=YWH          | 7.537278827 |
| High | Q14738 | Serine/threonine-protein phosphatase 2A 56 kDa regulat     | 7.512929533 |
| High | O15164 | Transcription intermediary factor 1-alpha OS=Homo sapi     | 7.49321716  |
| High | Q9UBB6 | Neurochondrin OS=Homo sapiens OX=9606 GN=NCDN P            | 7.483511958 |
| High | O15371 | Eukaryotic translation initiation factor 3 subunit D OS=Ho | 7.47700692  |
| High | Q03252 | Lamin-B2 OS=Homo sapiens OX=9606 GN=LMNB2 PE=1 S           | 7.466771785 |
| High | P25787 | Proteasome subunit alpha type-2 OS=Homo sapiens OX=        | 7.447267174 |
| High | Q9NPQ8 | Synembryn-A OS=Homo sapiens OX=9606 GN=RIC8A PE=           | 7.437987316 |
| High | Q13283 | Ras GTPase-activating protein-binding protein 1 OS=Horr    | 7.414380445 |
| High | P18124 | 60S ribosomal protein L7 OS=Homo sapiens OX=9606 GN        | 7.397719464 |
| High | Q8WVM8 | Sec1 family domain-containing protein 1 OS=Homo sapie      | 7.360350167 |
| High | O75083 | WD repeat-containing protein 1 OS=Homo sapiens OX=9        | 7.322888298 |
| High | P49916 | DNA ligase 3 OS=Homo sapiens OX=9606 GN=LIG3 PE=1          | 7.300357136 |
| High | Q12797 | Aspartyl/asparaginyl beta-hydroxylase OS=Homo sapiens      | 7.294604432 |
| High | Q12996 | Cleavage stimulation factor subunit 3 OS=Homo sapiens      | 7.27653267  |
| High | O75170 | Serine/threonine-protein phosphatase 6 regulatory subu     | 7.245878268 |
| High | O60256 | Phosphoribosyl pyrophosphate synthase-associated prot      | 7.244344633 |
| High | Q96RU2 | Ubiquitin carboxyl-terminal hydrolase 28 OS=Homo sapie     | 7.191641512 |
| High | P27797 | Calreticulin OS=Homo sapiens OX=9606 GN=CALR PE=1 S        | 7.185206881 |
| High | Q02241 | Kinesin-like protein KIF23 OS=Homo sapiens OX=9606 GN      | 7.179337815 |
| High | P46779 | 60S ribosomal protein L28 OS=Homo sapiens OX=9606 GN       | 7.165997578 |
| High | Q9UID3 | Vacuolar protein sorting-associated protein 51 homolog     | 7.153291855 |
| High | Q15477 | Helicase SKI2W OS=Homo sapiens OX=9606 GN=SKIV2L F         | 7.141180302 |
| High | P61313 | 60S ribosomal protein L15 OS=Homo sapiens OX=9606 GN       | 7.105431849 |
| High | P62195 | 26S proteasome regulatory subunit 8 OS=Homo sapiens        | 7.101158748 |
| High | Q5SW79 | Centrosomal protein of 170 kDa OS=Homo sapiens OX=9        | 7.060656248 |
| High | P19823 | Inter-alpha-trypsin inhibitor heavy chain H2 OS=Homo sa    | 7.021413509 |
| High | Q9H7D7 | WD repeat-containing protein 26 OS=Homo sapiens OX=        | 7.014204689 |
| High | Q99536 | Synaptic vesicle membrane protein VAT-1 homolog OS=H       | 7.013823702 |
| High | P31948 | Stress-induced-phosphoprotein 1 OS=Homo sapiens OX=        | 7.011970615 |
| High | Q53H12 | Acylglycerol kinase, mitochondrial OS=Homo sapiens OX:     | 7.009306039 |
| High | Q5VIR6 | Vacuolar protein sorting-associated protein 53 homolog     | 6.993700262 |
| High | A6NHR9 | Structural maintenance of chromosomes flexible hinge d     | 6.991919888 |
| High | O14773 | Tripeptidyl-peptidase 1 OS=Homo sapiens OX=9606 GN=        | 6.982341059 |
| High | P21796 | Voltage-dependent anion-selective channel protein 1 OS     | 6.896775131 |
| High | Q06203 | Amidophosphoribosyltransferase OS=Homo sapiens OX=         | 6.894767376 |
| High | O14929 | Histone acetyltransferase type B catalytic subunit OS=Ho   | 6.880744111 |
| High | Q6P9B9 | Integrator complex subunit 5 OS=Homo sapiens OX=960        | 6.872993739 |
| High | Q9UPN9 | E3 ubiquitin-protein ligase TRIM33 OS=Homo sapiens OX      | 6.854298931 |

|      |        |                                                           |             |
|------|--------|-----------------------------------------------------------|-------------|
| High | P61586 | Transforming protein RhoA OS=Homo sapiens OX=9606 GN=     | 6.842991747 |
| High | O15160 | DNA-directed RNA polymerases I and III subunit RPAC1 C    | 6.821598658 |
| High | O00203 | AP-3 complex subunit beta-1 OS=Homo sapiens OX=9606       | 6.809629217 |
| High | Q9UBQ7 | Glyoxylate reductase/hydroxypyruvate reductase OS=Ho      | 6.798168798 |
| High | Q99714 | 3-hydroxyacyl-CoA dehydrogenase type-2 OS=Homo sap        | 6.782358159 |
| High | Q15785 | Mitochondrial import receptor subunit TOM34 OS=Homo       | 6.778874344 |
| High | O43823 | A-kinase anchor protein 8 OS=Homo sapiens OX=9606 G       | 6.766767759 |
| High | P60866 | 40S ribosomal protein S20 OS=Homo sapiens OX=9606 G       | 6.756287458 |
| High | P37802 | Transgelin-2 OS=Homo sapiens OX=9606 GN=TAGLN2 PE         | 6.730407209 |
| High | Q9P035 | Very-long-chain (3R)-3-hydroxyacyl-CoA dehydratase 3 C    | 6.724821051 |
| High | Q9Y394 | Dehydrogenase/reductase SDR family member 7 OS=Ho         | 6.686581536 |
| High | O76021 | Ribosomal L1 domain-containing protein 1 OS=Homo sap      | 6.678950532 |
| High | Q6PGP7 | Tetratricopeptide repeat protein 37 OS=Homo sapiens O     | 6.657817432 |
| High | P08559 | Pyruvate dehydrogenase E1 component subunit alpha, s      | 6.629443909 |
| High | Q96CS3 | FAS-associated factor 2 OS=Homo sapiens OX=9606 GN=       | 6.627880755 |
| High | O15294 | UDP-N-acetylglucosamine--peptide N-acetylglucosaminy      | 6.601269253 |
| High | P14678 | Small nuclear ribonucleoprotein-associated proteins B ar  | 6.597132273 |
| High | Q01082 | Spectrin beta chain, non-erythrocytic 1 OS=Homo sapien    | 6.587725193 |
| High | Q15006 | ER membrane protein complex subunit 2 OS=Homo sapi        | 6.570856223 |
| High | P13861 | cAMP-dependent protein kinase type II-alpha regulatory    | 6.566870482 |
| High | Q8N8S7 | Protein enabled homolog OS=Homo sapiens OX=9606 GN        | 6.556884416 |
| High | P26368 | Splicing factor U2AF 65 kDa subunit OS=Homo sapiens O     | 6.54660062  |
| High | P42356 | Phosphatidylinositol 4-kinase alpha OS=Homo sapiens O     | 6.520904161 |
| High | P08237 | ATP-dependent 6-phosphofructokinase, muscle type OS=      | 6.493531582 |
| High | Q9UNS1 | Protein timeless homolog OS=Homo sapiens OX=9606 GN       | 6.473272484 |
| High | P53007 | Tricarboxylate transport protein, mitochondrial OS=Homo   | 6.436803316 |
| High | O95861 | 3'(2'),5'-bisphosphate nucleotidase 1 OS=Homo sapiens     | 6.434742657 |
| High | Q7L2H7 | Eukaryotic translation initiation factor 3 subunit M OS=H | 6.420412109 |
| High | Q16555 | Dihydropyrimidinase-related protein 2 OS=Homo sapiens     | 6.404666393 |
| High | Q15436 | Protein transport protein Sec23A OS=Homo sapiens OX=      | 6.391800591 |
| High | P49959 | Double-strand break repair protein MRE11 OS=Homo sap      | 6.38902062  |
| High | O75439 | Mitochondrial-processing peptidase subunit beta OS=Ho     | 6.376895912 |
| High | Q86UV5 | Ubiquitin carboxyl-terminal hydrolase 48 OS=Homo sapi     | 6.375044187 |
| High | Q8N3R9 | MAGUK p55 subfamily member 5 OS=Homo sapiens OX=          | 6.371573875 |
| High | P11387 | DNA topoisomerase 1 OS=Homo sapiens OX=9606 GN=T          | 6.370780309 |
| High | Q6P3W7 | SCY1-like protein 2 OS=Homo sapiens OX=9606 GN=SCYL       | 6.308942886 |
| High | A1L0T0 | Acetolactate synthase-like protein OS=Homo sapiens OX     | 6.307770164 |
| High | O00178 | GTP-binding protein 1 OS=Homo sapiens OX=9606 GN=G        | 6.2953962   |
| High | P19174 | 1-phosphatidylinositol 4,5-bisphosphate phosphodiester    | 6.247568632 |
| High | O43303 | Centriolar coiled-coil protein of 110 kDa OS=Homo sapie   | 6.247050539 |
| High | Q9BV20 | Methylthioribose-1-phosphate isomerase OS=Homo sapi       | 6.224668607 |
| High | O95299 | NADH dehydrogenase [ubiquinone] 1 alpha subcomplex        | 6.215454026 |
| High | Q9H993 | Protein-glutamate O-methyltransferase OS=Homo sapien      | 6.210688973 |
| High | O14776 | Transcription elongation regulator 1 OS=Homo sapiens C    | 6.207900297 |
| High | P36542 | ATP synthase subunit gamma, mitochondrial OS=Homo s       | 6.146731916 |
| High | Q9NWW4 | Histone PARylation factor 1 OS=Homo sapiens OX=9606       | 6.142461986 |
| High | O75396 | Vesicle-trafficking protein SEC22b OS=Homo sapiens OX=    | 6.111764327 |

|      |        |                                                          |             |
|------|--------|----------------------------------------------------------|-------------|
| High | P61619 | Protein transport protein Sec61 subunit alpha isoform 1  | 6.095288458 |
| High | P62280 | 40S ribosomal protein S11 OS=Homo sapiens OX=9606 G      | 6.094309785 |
| High | Q9Y277 | Voltage-dependent anion-selective channel protein 3 OS   | 6.037119521 |
| High | Q7Z4Q2 | HEAT repeat-containing protein 3 OS=Homo sapiens OX=     | 5.971996385 |
| High | Q15019 | Septin-2 OS=Homo sapiens OX=9606 GN=SEPT2 PE=1 SV        | 5.948837441 |
| High | Q8WUA4 | General transcription factor 3C polypeptide 2 OS=Homo    | 5.938177145 |
| High | Q9Y2Z0 | Protein SGT1 homolog OS=Homo sapiens OX=9606 GN=9        | 5.935905398 |
| High | O43615 | Mitochondrial import inner membrane translocase subu     | 5.926853022 |
| High | O95486 | Protein transport protein Sec24A OS=Homo sapiens OX=     | 5.90517962  |
| High | P49903 | Selenide, water dikinase 1 OS=Homo sapiens OX=9606 G     | 5.904830649 |
| High | Q9Y617 | Phosphoserine aminotransferase OS=Homo sapiens OX=       | 5.877992108 |
| High | Q6IN85 | Serine/threonine-protein phosphatase 4 regulatory subu   | 5.868271711 |
| High | P31150 | Rab GDP dissociation inhibitor alpha OS=Homo sapiens C   | 5.866141875 |
| High | Q96EK5 | KIF1-binding protein OS=Homo sapiens OX=9606 GN=KIF      | 5.859806321 |
| High | P23258 | Tubulin gamma-1 chain OS=Homo sapiens OX=9606 GN=        | 5.841336019 |
| High | Q9UGP8 | Translocation protein SEC63 homolog OS=Homo sapiens      | 5.830306349 |
| High | Q9Y383 | Putative RNA-binding protein Luc7-like 2 OS=Homo sapie   | 5.827573712 |
| High | Q96RT1 | Erbin OS=Homo sapiens OX=9606 GN=ERBIN PE=1 SV=2         | 5.822395115 |
| High | P17655 | Calpain-2 catalytic subunit OS=Homo sapiens OX=9606 G    | 5.812482099 |
| High | P62913 | 60S ribosomal protein L11 OS=Homo sapiens OX=9606 G      | 5.753784147 |
| High | P08621 | U1 small nuclear ribonucleoprotein 70 kDa OS=Homo sa     | 5.753457106 |
| High | Q9H2G2 | STE20-like serine/threonine-protein kinase OS=Homo sa    | 5.746191142 |
| High | Q9Y6E2 | Basic leucine zipper and W2 domain-containing protein 2  | 5.73652935  |
| High | O15027 | Protein transport protein Sec16A OS=Homo sapiens OX=     | 5.73641631  |
| High | P51116 | Fragile X mental retardation syndrome-related protein 2  | 5.716020716 |
| High | P55209 | Nucleosome assembly protein 1-like 1 OS=Homo sapiens     | 5.687707736 |
| High | Q9Y4R8 | Telomere length regulation protein TEL2 homolog OS=Ho    | 5.687611051 |
| High | Q9UBC2 | Epidermal growth factor receptor substrate 15-like 1 OS- | 5.68318907  |
| High | Q9Y6Y8 | SEC23-interacting protein OS=Homo sapiens OX=9606 G      | 5.675028983 |
| High | Q9BUJ2 | Heterogeneous nuclear ribonucleoprotein U-like protein   | 5.674353411 |
| High | Q9Y266 | Nuclear migration protein nudC OS=Homo sapiens OX=9      | 5.648745141 |
| High | P51784 | Ubiquitin carboxyl-terminal hydrolase 11 OS=Homo sapie   | 5.640847333 |
| High | Q15555 | Microtubule-associated protein RP/EB family member 2     | 5.636249294 |
| High | Q9UHB6 | LIM domain and actin-binding protein 1 OS=Homo sapier    | 5.632437605 |
| High | Q9Y6C9 | Mitochondrial carrier homolog 2 OS=Homo sapiens OX=9     | 5.598030424 |
| High | Q8NB90 | ATPase family protein 2 homolog OS=Homo sapiens OX=      | 5.576718228 |
| High | Q9UII4 | E3 ISG15--protein ligase HERC5 OS=Homo sapiens OX=96     | 5.572351629 |
| High | Q96SI9 | Spermatid perinuclear RNA-binding protein OS=Homo sa     | 5.569338234 |
| High | Q96J01 | THO complex subunit 3 OS=Homo sapiens OX=9606 GN=        | 5.554777209 |
| High | O60264 | SWI/SNF-related matrix-associated actin-dependent regu   | 5.55219721  |
| High | Q16512 | Serine/threonine-protein kinase N1 OS=Homo sapiens O     | 5.524200431 |
| High | P52907 | F-actin-capping protein subunit alpha-1 OS=Homo sapier   | 5.52275881  |
| High | P26373 | 60S ribosomal protein L13 OS=Homo sapiens OX=9606 G      | 5.514749149 |
| High | P85037 | Forkhead box protein K1 OS=Homo sapiens OX=9606 GN       | 5.513771703 |
| High | P51532 | Transcription activator BRG1 OS=Homo sapiens OX=9606     | 5.511925718 |
| High | Q14CX7 | N-alpha-acetyltransferase 25, NatB auxiliary subunit OS= | 5.503208684 |
| High | P62070 | Ras-related protein R-Ras2 OS=Homo sapiens OX=9606 C     | 5.486558516 |

|      |        |                                                           |             |
|------|--------|-----------------------------------------------------------|-------------|
| High | O95905 | Protein ecdysoneless homolog OS=Homo sapiens OX=96        | 5.485850866 |
| High | Q9P258 | Protein RCC2 OS=Homo sapiens OX=9606 GN=RCC2 PE=1         | 5.482279569 |
| High | P11766 | Alcohol dehydrogenase class-3 OS=Homo sapiens OX=96       | 5.479429198 |
| High | Q9UNL2 | Translocon-associated protein subunit gamma OS=Homoc      | 5.474178048 |
| High | Q9Y4C1 | Lysine-specific demethylase 3A OS=Homo sapiens OX=96      | 5.461551948 |
| High | Q9BV79 | Enoyl-[acyl-carrier-protein] reductase, mitochondrial OS- | 5.459045191 |
| High | P33121 | Long-chain-fatty-acid--CoA ligase 1 OS=Homo sapiens OX    | 5.453148135 |
| High | P35249 | Replication factor C subunit 4 OS=Homo sapiens OX=960     | 5.428215831 |
| High | Q4KMP7 | TBC1 domain family member 10B OS=Homo sapiens OX=         | 5.407705077 |
| High | Q9NRF8 | CTP synthase 2 OS=Homo sapiens OX=9606 GN=CTPS2 P         | 5.393068054 |
| High | Q8N163 | Cell cycle and apoptosis regulator protein 2 OS=Homo sa   | 5.390868302 |
| High | P51553 | Isocitrate dehydrogenase [NAD] subunit gamma, mitoch      | 5.388663928 |
| High | Q5VUJ6 | Leucine-rich repeat and calponin homology domain-cont     | 5.383193981 |
| High | P50416 | Carnitine O-palmitoyltransferase 1, liver isoform OS=Hor  | 5.381575329 |
| High | P49720 | Proteasome subunit beta type-3 OS=Homo sapiens OX=9       | 5.352128235 |
| High | Q9Y5V3 | Melanoma-associated antigen D1 OS=Homo sapiens OX=        | 5.338138873 |
| High | A7E2V4 | Zinc finger SWIM domain-containing protein 8 OS=Homoc     | 5.324947371 |
| High | P13674 | Prolyl 4-hydroxylase subunit alpha-1 OS=Homo sapiens C    | 5.309918385 |
| High | Q10570 | Cleavage and polyadenylation specificity factor subunit 1 | 5.272214826 |
| High | Q96T88 | E3 ubiquitin-protein ligase UHRF1 OS=Homo sapiens OX=     | 5.263598796 |
| High | Q96H79 | Zinc finger CCCH-type antiviral protein 1-like OS=Homo s  | 5.261060969 |
| High | Q16836 | Hydroxyacyl-coenzyme A dehydrogenase, mitochondrial       | 5.248598864 |
| High | O14545 | TRAF-type zinc finger domain-containing protein 1 OS=H    | 5.247490599 |
| High | P29966 | Myristoylated alanine-rich C-kinase substrate OS=Homo     | 5.247348279 |
| High | Q9NZB2 | Constitutive coactivator of PPAR-gamma-like protein 1 C   | 5.246171446 |
| High | Q8WTT2 | Nucleolar complex protein 3 homolog OS=Homo sapiens       | 5.236056401 |
| High | P62424 | 60S ribosomal protein L7a OS=Homo sapiens OX=9606 G       | 5.21690748  |
| High | Q66K14 | TBC1 domain family member 9B OS=Homo sapiens OX=9         | 5.205557965 |
| High | O00139 | Kinesin-like protein KIF2A OS=Homo sapiens OX=9606 G      | 5.200892791 |
| High | Q08379 | Golgin subfamily A member 2 OS=Homo sapiens OX=960        | 5.156852469 |
| High | P40926 | Malate dehydrogenase, mitochondrial OS=Homo sapiens       | 5.149381698 |
| High | P49770 | Translation initiation factor eIF-2B subunit beta OS=Hom  | 5.143661002 |
| High | P08708 | 40S ribosomal protein S17 OS=Homo sapiens OX=9606 G       | 5.140294067 |
| High | Q8IZH2 | 5'-3' exoribonuclease 1 OS=Homo sapiens OX=9606 GN=       | 5.131238042 |
| High | Q5ST30 | Valine--tRNA ligase, mitochondrial OS=Homo sapiens OX     | 5.121388942 |
| High | Q13363 | C-terminal-binding protein 1 OS=Homo sapiens OX=9606      | 5.116843832 |
| High | P52630 | Signal transducer and activator of transcription 2 OS=Ho  | 5.107126593 |
| High | P01023 | Alpha-2-macroglobulin OS=Homo sapiens OX=9606 GN=,        | 5.099670457 |
| High | O95232 | Luc7-like protein 3 OS=Homo sapiens OX=9606 GN=LUC7       | 5.070427821 |
| High | Q14746 | Conserved oligomeric Golgi complex subunit 2 OS=Homoc     | 5.063737658 |
| High | E9PAV3 | Nascent polypeptide-associated complex subunit alpha, i   | 5.061730517 |
| High | Q8IZ69 | tRNA (uracil-5-)-methyltransferase homolog A OS=Homo      | 5.052376818 |
| High | Q6AI08 | HEAT repeat-containing protein 6 OS=Homo sapiens OX=      | 5.008419543 |
| High | O00116 | Alkyldihydroxyacetonephosphate synthase, peroxisomal      | 5.006782515 |
| High | Q15084 | Protein disulfide-isomerase A6 OS=Homo sapiens OX=96      | 4.999130675 |
| High | Q9P2E9 | Ribosome-binding protein 1 OS=Homo sapiens OX=9606        | 4.990549104 |
| High | Q9BV86 | N-terminal Xaa-Pro-Lys N-methyltransferase 1 OS=Homoc     | 4.98625794  |

|      |        |                                                                                                                      |             |
|------|--------|----------------------------------------------------------------------------------------------------------------------|-------------|
| High | P35250 | Replication factor C subunit 2 OS=Homo sapiens OX=9606 GN=RFC2 PE=1 SV=4                                             | 4.981715692 |
| High | P52747 | Zinc finger protein 143 OS=Homo sapiens OX=9606 GN=ZFP143 PE=1 SV=4                                                  | 4.977206653 |
| High | Q92538 | Golgi-specific brefeldin A-resistance guanine nucleotide exchange factor 1 OS=Homo sapiens OX=9606 GN=GBF1 PE=1 SV=4 | 4.97617428  |
| High | Q6PJG6 | BRCA1-associated ATM activator 1 OS=Homo sapiens OX=9606 GN=BRCA1A1 PE=1 SV=4                                        | 4.97495602  |
| High | Q96QU8 | Exportin-6 OS=Homo sapiens OX=9606 GN=XPO6 PE=1 SV=4                                                                 | 4.953309857 |
| High | Q96E17 | Ras-related protein Rab-3C OS=Homo sapiens OX=9606 GN=RAB3C PE=1 SV=4                                                | 4.940254459 |
| High | Q01968 | Inositol polyphosphate 5-phosphatase OCRL-1 OS=Homo sapiens OX=9606 GN=OCRL1 PE=1 SV=4                               | 4.918418107 |
| High | Q9P210 | Cleavage and polyadenylation specificity factor subunit 2 OS=Homo sapiens OX=9606 GN=CPSF2 PE=1 SV=4                 | 4.90963806  |
| High | Q9ULK4 | Mediator of RNA polymerase II transcription subunit 23 OS=Homo sapiens OX=9606 GN=MTF23 PE=1 SV=4                    | 4.901765569 |
| High | P62847 | 40S ribosomal protein S24 OS=Homo sapiens OX=9606 GN=RPS24 PE=1 SV=4                                                 | 4.901010361 |
| High | O60306 | RNA helicase aquarius OS=Homo sapiens OX=9606 GN=AQUARIUS PE=1 SV=4                                                  | 4.894489815 |
| High | P35611 | Alpha-adducin OS=Homo sapiens OX=9606 GN=ADD1 PE=1 SV=4                                                              | 4.893125109 |
| High | Q99570 | Phosphoinositide 3-kinase regulatory subunit 4 OS=Homo sapiens OX=9606 GN=PI3KR4 PE=1 SV=4                           | 4.87484417  |
| High | Q96DV4 | 39S ribosomal protein L38, mitochondrial OS=Homo sapiens OX=9606 GN=RL38 PE=1 SV=4                                   | 4.872765581 |
| High | P37837 | Transaldolase OS=Homo sapiens OX=9606 GN=TALDO1 PE=1 SV=4                                                            | 4.87086838  |
| High | P23526 | Adenosylhomocysteinase OS=Homo sapiens OX=9606 GN=ADHC PE=1 SV=4                                                     | 4.8686945   |
| High | P52565 | Rho GDP-dissociation inhibitor 1 OS=Homo sapiens OX=9606 GN=RHOGEF1 PE=1 SV=4                                        | 4.851397345 |
| High | Q99729 | Heterogeneous nuclear ribonucleoprotein A/B OS=Homo sapiens OX=9606 GN=HNRAB1 PE=1 SV=4                              | 4.84924356  |
| High | Q93034 | Cullin-5 OS=Homo sapiens OX=9606 GN=CUL5 PE=1 SV=4                                                                   | 4.784098187 |
| High | Q9UHD2 | Serine/threonine-protein kinase TBK1 OS=Homo sapiens OX=9606 GN=TBK1 PE=1 SV=4                                       | 4.736600669 |
| High | Q9H0W5 | Coiled-coil domain-containing protein 8 OS=Homo sapiens OX=9606 GN=CCDC8 PE=1 SV=4                                   | 4.730487056 |
| High | P42765 | 3-ketoacyl-CoA thiolase, mitochondrial OS=Homo sapiens OX=9606 GN=ACATL1 PE=1 SV=4                                   | 4.725842151 |
| High | P28482 | Mitogen-activated protein kinase 1 OS=Homo sapiens OX=9606 GN=MAPK1 PE=1 SV=4                                        | 4.696563181 |
| High | Q6DKJ4 | Nucleoredoxin OS=Homo sapiens OX=9606 GN=NXN PE=1 SV=4                                                               | 4.670195478 |
| High | Q9UMS4 | Pre-mRNA-processing factor 19 OS=Homo sapiens OX=9606 GN=PRPF19 PE=1 SV=4                                            | 4.659555885 |
| High | Q9BZL6 | Serine/threonine-protein kinase D2 OS=Homo sapiens OX=9606 GN=PRKDD2 PE=1 SV=4                                       | 4.650046102 |
| High | Q8TC12 | Retinol dehydrogenase 11 OS=Homo sapiens OX=9606 GN=RHDH11 PE=1 SV=4                                                 | 4.643591673 |
| High | P04908 | Histone H2A type 1-B/E OS=Homo sapiens OX=9606 GN=H2A PE=1 SV=4                                                      | 4.63201974  |
| High | Q8IX18 | Probable ATP-dependent RNA helicase DHX40 OS=Homo sapiens OX=9606 GN=DHX40 PE=1 SV=4                                 | 4.627925741 |
| High | Q9UHI6 | Probable ATP-dependent RNA helicase DDX20 OS=Homo sapiens OX=9606 GN=DDX20 PE=1 SV=4                                 | 4.585360853 |
| High | P06744 | Glucose-6-phosphate isomerase OS=Homo sapiens OX=9606 GN=PFFB PE=1 SV=4                                              | 4.575405811 |
| High | P61254 | 60S ribosomal protein L26 OS=Homo sapiens OX=9606 GN=RPL26 PE=1 SV=4                                                 | 4.555672848 |
| High | P48507 | Glutamate--cysteine ligase regulatory subunit OS=Homo sapiens OX=9606 GN=GLY1 PE=1 SV=4                              | 4.544005721 |
| High | Q96S59 | Ran-binding protein 9 OS=Homo sapiens OX=9606 GN=RANBP9 PE=1 SV=4                                                    | 4.531062194 |
| High | Q13123 | Protein Red OS=Homo sapiens OX=9606 GN=IK PE=1 SV=4                                                                  | 4.5289434   |
| High | O95786 | Probable ATP-dependent RNA helicase DDX58 OS=Homo sapiens OX=9606 GN=DDX58 PE=1 SV=4                                 | 4.521904616 |
| High | O14641 | Segment polarity protein dishevelled homolog DVL-2 OS=Homo sapiens OX=9606 GN=DVL2 PE=1 SV=4                         | 4.505845406 |
| High | Q5W0B1 | RING finger protein 219 OS=Homo sapiens OX=9606 GN=RF219 PE=1 SV=4                                                   | 4.498603845 |
| High | Q13610 | Periodic tryptophan protein 1 homolog OS=Homo sapiens OX=9606 GN=PTP1 PE=1 SV=4                                      | 4.458545571 |
| High | P00374 | Dihydrofolate reductase OS=Homo sapiens OX=9606 GN=DHFR PE=1 SV=4                                                    | 4.415668776 |
| High | Q6P1Q9 | Methyltransferase-like protein 2B OS=Homo sapiens OX=9606 GN=MLP2B PE=1 SV=4                                         | 4.414313722 |
| High | O75175 | CCR4-NOT transcription complex subunit 3 OS=Homo sapiens OX=9606 GN=NOT3 PE=1 SV=4                                   | 4.390832626 |
| High | Q16186 | Proteasomal ubiquitin receptor ADRM1 OS=Homo sapiens OX=9606 GN=ADRM1 PE=1 SV=4                                      | 4.389446295 |
| High | O75688 | Protein phosphatase 1B OS=Homo sapiens OX=9606 GN=PPP1B PE=1 SV=4                                                    | 4.320390428 |
| High | O75521 | Enoyl-CoA delta isomerase 2, mitochondrial OS=Homo sapiens OX=9606 GN=ENCO2 PE=1 SV=4                                | 4.284665316 |
| High | P14314 | Glucosidase 2 subunit beta OS=Homo sapiens OX=9606 GN=GLUC2B PE=1 SV=4                                               | 4.271448923 |
| High | P22234 | Multifunctional protein ADE2 OS=Homo sapiens OX=9606 GN=ADE2 PE=1 SV=4                                               | 4.270443566 |

|      |        |                                                            |             |
|------|--------|------------------------------------------------------------|-------------|
| High | Q96J02 | E3 ubiquitin-protein ligase Itchy homolog OS=Homo sapi     | 4.25904644  |
| High | P40763 | Signal transducer and activator of transcription 3 OS=Ho   | 4.253210168 |
| High | P02771 | Alpha-fetoprotein OS=Homo sapiens OX=9606 GN=AFP P         | 4.248259126 |
| High | Q9UPU5 | Ubiquitin carboxyl-terminal hydrolase 24 OS=Homo sapi      | 4.241898133 |
| High | Q9NQX3 | Gephyrin OS=Homo sapiens OX=9606 GN=GPHN PE=1 SV           | 4.234554982 |
| High | P52434 | DNA-directed RNA polymerases I, II, and III subunit RPAB   | 4.231954186 |
| High | Q13547 | Histone deacetylase 1 OS=Homo sapiens OX=9606 GN=H         | 4.2278986   |
| High | Q9BSJ2 | Gamma-tubulin complex component 2 OS=Homo sapien           | 4.226267414 |
| High | Q5TAX3 | Terminal uridylyltransferase 4 OS=Homo sapiens OX=960      | 4.226102437 |
| High | P36507 | Dual specificity mitogen-activated protein kinase kinase   | 4.191383965 |
| High | P46778 | 60S ribosomal protein L21 OS=Homo sapiens OX=9606 G        | 4.186356644 |
| High | Q3MII6 | TBC1 domain family member 25 OS=Homo sapiens OX=9          | 4.167299529 |
| High | Q9P1Y5 | Calmodulin-regulated spectrin-associated protein 3 OS=H    | 4.164372834 |
| High | Q96HE7 | ERO1-like protein alpha OS=Homo sapiens OX=9606 GN=        | 4.151687696 |
| High | P04792 | Heat shock protein beta-1 OS=Homo sapiens OX=9606 G        | 4.151072287 |
| High | Q05209 | Tyrosine-protein phosphatase non-receptor type 12 OS=      | 4.144905049 |
| High | Q96EK9 | Protein KTI12 homolog OS=Homo sapiens OX=9606 GN=          | 4.144057054 |
| High | P14635 | G2/mitotic-specific cyclin-B1 OS=Homo sapiens OX=9606      | 4.142486585 |
| High | Q86V85 | Integral membrane protein GPR180 OS=Homo sapiens O         | 4.124417896 |
| High | Q9Y263 | Phospholipase A-2-activating protein OS=Homo sapiens       | 4.117247844 |
| High | P62244 | 40S ribosomal protein S15a OS=Homo sapiens OX=9606         | 4.115254467 |
| High | Q92597 | Protein NDRG1 OS=Homo sapiens OX=9606 GN=NDRG1             | 4.104246058 |
| High | Q9Y262 | Eukaryotic translation initiation factor 3 subunit L OS=Ho | 4.097833871 |
| High | Q5T6F2 | Ubiquitin-associated protein 2 OS=Homo sapiens OX=960      | 4.092130668 |
| High | P35268 | 60S ribosomal protein L22 OS=Homo sapiens OX=9606 G        | 4.087671642 |
| High | P22033 | Methylmalonyl-CoA mutase, mitochondrial OS=Homo sa         | 4.079928876 |
| High | O14920 | Inhibitor of nuclear factor kappa-B kinase subunit beta O  | 4.077326432 |
| High | Q9H270 | Vacuolar protein sorting-associated protein 11 homolog     | 4.074378545 |
| High | Q15102 | Platelet-activating factor acetylhydrolase IB subunit gam  | 4.073366951 |
| High | P61962 | DDB1- and CUL4-associated factor 7 OS=Homo sapiens C       | 4.06606928  |
| High | O60231 | Pre-mRNA-splicing factor ATP-dependent RNA helicase D      | 4.061380218 |
| High | P50914 | 60S ribosomal protein L14 OS=Homo sapiens OX=9606 G        | 4.032873419 |
| High | O00487 | 26S proteasome non-ATPase regulatory subunit 14 OS=H       | 4.023439254 |
| High | O00299 | Chloride intracellular channel protein 1 OS=Homo sapien    | 4.021363052 |
| High | Q9NUQ9 | Protein FAM49B OS=Homo sapiens OX=9606 GN=FAM49            | 4.020360588 |
| High | P41229 | Lysine-specific demethylase 5C OS=Homo sapiens OX=96       | 4.017579504 |
| High | Q3YEC7 | Rab-like protein 6 OS=Homo sapiens OX=9606 GN=RABL         | 4.010016542 |
| High | Q92620 | Pre-mRNA-splicing factor ATP-dependent RNA helicase P      | 4.005858889 |
| High | Q9BZH6 | WD repeat-containing protein 11 OS=Homo sapiens OX=        | 4.001522697 |
| High | P11717 | Cation-independent mannose-6-phosphate receptor OS=        | 4.000387564 |
| High | Q9P253 | Vacuolar protein sorting-associated protein 18 homolog     | 3.998707077 |
| High | Q9UBX3 | Mitochondrial dicarboxylate carrier OS=Homo sapiens O      | 3.98088371  |
| High | Q92995 | Ubiquitin carboxyl-terminal hydrolase 13 OS=Homo sapi      | 3.979383106 |
| High | Q3MHD2 | Protein LSM12 homolog OS=Homo sapiens OX=9606 GN=          | 3.966978555 |
| High | Q99459 | Cell division cycle 5-like protein OS=Homo sapiens OX=96   | 3.966726343 |
| High | Q15382 | GTP-binding protein Rheb OS=Homo sapiens OX=9606 G         | 3.948461609 |
| High | P43487 | Ran-specific GTPase-activating protein OS=Homo sapiens     | 3.947306058 |

|      |        |                                                                                                          |             |
|------|--------|----------------------------------------------------------------------------------------------------------|-------------|
| High | Q9Y2W1 | Thyroid hormone receptor-associated protein 3 OS=Homo sapiens OX=9606 GN=TRHRAP3 PE=1 SV=1               | 3.932061868 |
| High | P54578 | Ubiquitin carboxyl-terminal hydrolase 14 OS=Homo sapiens OX=9606 GN=UBCH14 PE=1 SV=1                     | 3.927382523 |
| High | O75828 | Carbonyl reductase [NADPH] 3 OS=Homo sapiens OX=9606 GN=CBR3 PE=1 SV=1                                   | 3.916139199 |
| High | Q13308 | Inactive tyrosine-protein kinase 7 OS=Homo sapiens OX=9606 GN=ITK7 PE=1 SV=1                             | 3.890421453 |
| High | P51571 | Translocon-associated protein subunit delta OS=Homo sapiens OX=9606 GN=TPSD PE=1 SV=1                    | 3.885722703 |
| High | P28066 | Proteasome subunit alpha type-5 OS=Homo sapiens OX=9606 GN=PSMA5 PE=1 SV=1                               | 3.88008459  |
| High | Q9H9E3 | Conserved oligomeric Golgi complex subunit 4 OS=Homo sapiens OX=9606 GN=COG4 PE=1 SV=1                   | 3.877784122 |
| High | Q9HD33 | 39S ribosomal protein L47, mitochondrial OS=Homo sapiens OX=9606 GN=MRPL47 PE=1 SV=1                     | 3.86998805  |
| High | Q12789 | General transcription factor 3C polypeptide 1 OS=Homo sapiens OX=9606 GN=TF3C1 PE=1 SV=1                 | 3.863102644 |
| High | P46060 | Ran GTPase-activating protein 1 OS=Homo sapiens OX=9606 GN=RANBP1 PE=1 SV=1                              | 3.85886391  |
| High | Q86VI3 | Ras GTPase-activating-like protein IQGAP3 OS=Homo sapiens OX=9606 GN=IQGAP3 PE=1 SV=1                    | 3.85326066  |
| High | O95372 | Acyl-protein thioesterase 2 OS=Homo sapiens OX=9606 GN=APTE2 PE=1 SV=1                                   | 3.821023053 |
| High | O14976 | Cyclin-G-associated kinase OS=Homo sapiens OX=9606 GN=CK1G PE=1 SV=1                                     | 3.819587367 |
| High | P15880 | 40S ribosomal protein S2 OS=Homo sapiens OX=9606 GN=RS2 PE=1 SV=1                                        | 3.818755695 |
| High | P42684 | Tyrosine-protein kinase ABL2 OS=Homo sapiens OX=9606 GN=ABL2 PE=1 SV=1                                   | 3.814741235 |
| High | Q9H2P9 | Diphthine methyl ester synthase OS=Homo sapiens OX=9606 GN=DMES PE=1 SV=1                                | 3.809388202 |
| High | P04004 | Vitronectin OS=Homo sapiens OX=9606 GN=VTN PE=1 SV=1                                                     | 3.789413975 |
| High | P04899 | Guanine nucleotide-binding protein G(i) subunit alpha-2 OS=Homo sapiens OX=9606 GN=GNAS2 PE=1 SV=1       | 3.781202002 |
| High | P24941 | Cyclin-dependent kinase 2 OS=Homo sapiens OX=9606 GN=CDK2 PE=1 SV=1                                      | 3.778985967 |
| High | P22413 | Ectonucleotide pyrophosphatase/phosphodiesterase family 1 OS=Homo sapiens OX=9606 GN=ENTPD1 PE=1 SV=1    | 3.770318158 |
| High | P49589 | Cysteine--tRNA ligase, cytoplasmic OS=Homo sapiens OX=9606 GN=CYSL1 PE=1 SV=1                            | 3.764724123 |
| High | Q9UK59 | Lariat debranching enzyme OS=Homo sapiens OX=9606 GN=LDE PE=1 SV=1                                       | 3.751536282 |
| High | Q02218 | 2-oxoglutarate dehydrogenase, mitochondrial OS=Homo sapiens OX=9606 GN=MDH2 PE=1 SV=1                    | 3.747949613 |
| High | P43686 | 26S proteasome regulatory subunit 6B OS=Homo sapiens OX=9606 GN=PSMD6B PE=1 SV=1                         | 3.746904414 |
| High | Q15437 | Protein transport protein Sec23B OS=Homo sapiens OX=9606 GN=SEC23B PE=1 SV=1                             | 3.729554092 |
| High | P09110 | 3-ketoacyl-CoA thiolase, peroxisomal OS=Homo sapiens OX=9606 GN=3KAT PE=1 SV=1                           | 3.71219827  |
| High | Q7Z6Z7 | E3 ubiquitin-protein ligase HUWE1 OS=Homo sapiens OX=9606 GN=HUWE1 PE=1 SV=1                             | 3.710620888 |
| High | Q8ND04 | Protein SMG8 OS=Homo sapiens OX=9606 GN=SMG8 PE=1 SV=1                                                   | 3.705313376 |
| High | Q9NVP1 | ATP-dependent RNA helicase DDX18 OS=Homo sapiens OX=9606 GN=DDX18 PE=1 SV=1                              | 3.696803943 |
| High | Q96R06 | Sperm-associated antigen 5 OS=Homo sapiens OX=9606 GN=SA5 PE=1 SV=1                                      | 3.695294102 |
| High | P81605 | Dermcidin OS=Homo sapiens OX=9606 GN=DCD PE=1 SV=1                                                       | 3.678194516 |
| High | O76071 | Probable cytosolic iron-sulfur protein assembly protein C OS=Homo sapiens OX=9606 GN=PCSA1 PE=1 SV=1     | 3.649308588 |
| High | Q9Y5K5 | Ubiquitin carboxyl-terminal hydrolase isozyme L5 OS=Homo sapiens OX=9606 GN=UBCH5L PE=1 SV=1             | 3.637706062 |
| High | Q8TF05 | Serine/threonine-protein phosphatase 4 regulatory subunit 1 OS=Homo sapiens OX=9606 GN=PPP4R1 PE=1 SV=1  | 3.633633084 |
| High | Q9H4A3 | Serine/threonine-protein kinase WNK1 OS=Homo sapiens OX=9606 GN=WNK1 PE=1 SV=1                           | 3.622875958 |
| High | P68402 | Platelet-activating factor acetylhydrolase IB subunit beta OS=Homo sapiens OX=9606 GN=PAFAH1B2 PE=1 SV=1 | 3.619065537 |
| High | O75494 | Serine/arginine-rich splicing factor 10 OS=Homo sapiens OX=9606 GN=SRSF10 PE=1 SV=1                      | 3.602755419 |
| High | Q86TB9 | Protein PAT1 homolog 1 OS=Homo sapiens OX=9606 GN=PAT1 PE=1 SV=1                                         | 3.589054141 |
| High | O43491 | Band 4.1-like protein 2 OS=Homo sapiens OX=9606 GN=BLP2 PE=1 SV=1                                        | 3.583463336 |
| High | Q9H2U1 | ATP-dependent DNA/RNA helicase DHX36 OS=Homo sapiens OX=9606 GN=DHX36 PE=1 SV=1                          | 3.573976984 |
| High | Q8WUA2 | Peptidyl-prolyl cis-trans isomerase-like 4 OS=Homo sapiens OX=9606 GN=PP5R4 PE=1 SV=1                    | 3.552709669 |
| High | Q9P2R3 | Rabankyrin-5 OS=Homo sapiens OX=9606 GN=ANKFY1 PE=1 SV=1                                                 | 3.552221991 |
| High | Q9GZR7 | ATP-dependent RNA helicase DDX24 OS=Homo sapiens OX=9606 GN=DDX24 PE=1 SV=1                              | 3.549904924 |
| High | P35237 | Serpin B6 OS=Homo sapiens OX=9606 GN=SERPINB6 PE=1 SV=1                                                  | 3.531692556 |
| High | Q9BY89 | Uncharacterized protein KIAA1671 OS=Homo sapiens OX=9606 GN=KIAA1671 PE=1 SV=1                           | 3.516127546 |
| High | Q00535 | Cyclin-dependent-like kinase 5 OS=Homo sapiens OX=9606 GN=CDLK5 PE=1 SV=1                                | 3.51446732  |
| High | Q9BVQ7 | Spermatogenesis-associated protein 5-like protein 1 OS=Homo sapiens OX=9606 GN=SPAG5L1 PE=1 SV=1         | 3.50751899  |

|      |        |                                                          |             |
|------|--------|----------------------------------------------------------|-------------|
| High | O60568 | Multifunctional procollagen lysine hydroxylase and glyco | 3.506123889 |
| High | Q99661 | Kinesin-like protein KIF2C OS=Homo sapiens OX=9606 GN=   | 3.496950605 |
| High | Q16762 | Thiosulfate sulfurtransferase OS=Homo sapiens OX=9606    | 3.482276405 |
| High | Q9NW82 | WD repeat-containing protein 70 OS=Homo sapiens OX=      | 3.480303233 |
| High | Q5VZE5 | N-alpha-acetyltransferase 35, NatC auxiliary subunit OS= | 3.478731124 |
| High | Q9H7Z7 | Prostaglandin E synthase 2 OS=Homo sapiens OX=9606 C     | 3.473789996 |
| High | P11171 | Protein 4.1 OS=Homo sapiens OX=9606 GN=EPB41 PE=1        | 3.463694128 |
| High | P18858 | DNA ligase 1 OS=Homo sapiens OX=9606 GN=LIG1 PE=1        | 3.462432743 |
| High | A4D1P6 | WD repeat-containing protein 91 OS=Homo sapiens OX=      | 3.45259454  |
| High | Q9NTK5 | Obg-like ATPase 1 OS=Homo sapiens OX=9606 GN=OLA1        | 3.438064237 |
| High | Q86YZ3 | Hornerin OS=Homo sapiens OX=9606 GN=HRNR PE=1 SV         | 3.434860848 |
| High | Q8IYI6 | Exocyst complex component 8 OS=Homo sapiens OX=96        | 3.419531216 |
| High | Q01780 | Exosome component 10 OS=Homo sapiens OX=9606 GN          | 3.39653084  |
| High | Q13625 | Apoptosis-stimulating of p53 protein 2 OS=Homo sapien    | 3.392223396 |
| High | Q8TE77 | Protein phosphatase Slingshot homolog 3 OS=Homo sapi     | 3.390832626 |
| High | Q9BZF1 | Oxysterol-binding protein-related protein 8 OS=Homo sa   | 3.390832626 |
| High | Q8WWK9 | Cytoskeleton-associated protein 2 OS=Homo sapiens OX:    | 3.372634143 |
| High | Q99543 | DnaJ homolog subfamily C member 2 OS=Homo sapiens        | 3.372429336 |
| High | Q9HCG8 | Pre-mRNA-splicing factor CWC22 homolog OS=Homo sap       | 3.366531544 |
| High | P56537 | Eukaryotic translation initiation factor 6 OS=Homo sapie | 3.363612414 |
| High | Q9NP79 | Vacuolar protein sorting-associated protein VTA1 homol   | 3.362110183 |
| High | Q9UNE7 | E3 ubiquitin-protein ligase CHIP OS=Homo sapiens OX=9    | 3.352842452 |
| High | Q9Y3A5 | Ribosome maturation protein SBDS OS=Homo sapiens O       | 3.341471214 |
| High | P29144 | Tripeptidyl-peptidase 2 OS=Homo sapiens OX=9606 GN=      | 3.339134522 |
| High | Q9HCN4 | GPN-loop GTPase 1 OS=Homo sapiens OX=9606 GN=GPN         | 3.338281942 |
| High | P82650 | 28S ribosomal protein S22, mitochondrial OS=Homo sapi    | 3.337431033 |
| High | Q9BWU0 | Kanadaptin OS=Homo sapiens OX=9606 GN=SLC4A1AP P         | 3.335264031 |
| High | P98175 | RNA-binding protein 10 OS=Homo sapiens OX=9606 GN=       | 3.329939783 |
| High | P07737 | Profilin-1 OS=Homo sapiens OX=9606 GN=PFN1 PE=1 SV       | 3.329105046 |
| High | Q6DN90 | IQ motif and SEC7 domain-containing protein 1 OS=Hom     | 3.319030282 |
| High | Q9BRX2 | Protein pelota homolog OS=Homo sapiens OX=9606 GN=       | 3.316412682 |
| High | Q15648 | Mediator of RNA polymerase II transcription subunit 1 O  | 3.316142795 |
| High | P62249 | 40S ribosomal protein S16 OS=Homo sapiens OX=9606 G      | 3.310513552 |
| High | O00267 | Transcription elongation factor SPT5 OS=Homo sapiens C   | 3.2892059   |
| High | P02786 | Transferrin receptor protein 1 OS=Homo sapiens OX=960    | 3.277283833 |
| High | P30048 | Thioredoxin-dependent peroxide reductase, mitochondr     | 3.269459964 |
| High | P62906 | 60S ribosomal protein L10a OS=Homo sapiens OX=9606       | 3.258970667 |
| High | O96005 | Cleft lip and palate transmembrane protein 1 OS=Homo     | 3.250650239 |
| High | Q8WYQ5 | Microprocessor complex subunit DGCR8 OS=Homo sapie       | 3.243896628 |
| High | Q5JWF2 | Guanine nucleotide-binding protein G(s) subunit alpha is | 3.242224509 |
| High | Q9C0E2 | Exportin-4 OS=Homo sapiens OX=9606 GN=XPO4 PE=1 S        | 3.232473101 |
| High | O14818 | Proteasome subunit alpha type-7 OS=Homo sapiens OX=      | 3.226872076 |
| High | Q13423 | NAD(P) transhydrogenase, mitochondrial OS=Homo sapi      | 3.221921138 |
| High | Q6P1J9 | Parafibromin OS=Homo sapiens OX=9606 GN=CDC73 PE:        | 3.21346152  |
| High | P40429 | 60S ribosomal protein L13a OS=Homo sapiens OX=9606       | 3.212004957 |
| High | Q9UIU6 | Homeobox protein SIX4 OS=Homo sapiens OX=9606 GN=        | 3.162348442 |
| High | P67809 | Nuclease-sensitive element-binding protein 1 OS=Homo     | 3.162105517 |

|      |        |                                                                                          |             |
|------|--------|------------------------------------------------------------------------------------------|-------------|
| High | Q9NXF1 | Testis-expressed protein 10 OS=Homo sapiens OX=9606                                      | 3.138525331 |
| High | Q9Y2Q3 | Glutathione S-transferase kappa 1 OS=Homo sapiens OX=9606                                | 3.135548253 |
| High | Q8IVS2 | Malonyl-CoA-acyl carrier protein transacylase, mitochondrion OS=Homo sapiens OX=9606     | 3.131355562 |
| High | Q99567 | Nuclear pore complex protein Nup88 OS=Homo sapiens OX=9606                               | 3.124244421 |
| High | P39019 | 40S ribosomal protein S19 OS=Homo sapiens OX=9606 GN=S19                                 | 3.124128809 |
| High | P41214 | Eukaryotic translation initiation factor 2D OS=Homo sapiens OX=9606                      | 3.117931056 |
| High | Q9UNX4 | WD repeat-containing protein 3 OS=Homo sapiens OX=9606 GN=WDRC3                          | 3.105407052 |
| High | Q9UNN5 | FAS-associated factor 1 OS=Homo sapiens OX=9606 GN=FAF1                                  | 3.105185671 |
| High | Q96EA4 | Protein Spindly OS=Homo sapiens OX=9606 GN=SPDL1                                         | 3.0759793   |
| High | Q6ZSR9 | Uncharacterized protein FLJ45252 OS=Homo sapiens OX=9606 GN=FLJ45252                     | 3.065501549 |
| High | Q8WVC6 | Dephospho-CoA kinase domain-containing protein OS=Homo sapiens OX=9606                   | 3.057198534 |
| High | Q9Y295 | Developmentally-regulated GTP-binding protein 1 OS=Homo sapiens OX=9606                  | 3.054482178 |
| High | Q6ZXV5 | Transmembrane and TPR repeat-containing protein 3 OS=Homo sapiens OX=9606                | 3.05232126  |
| High | O95352 | Ubiquitin-like modifier-activating enzyme ATG7 OS=Homo sapiens OX=9606                   | 3.048711063 |
| High | Q9Y2U8 | Inner nuclear membrane protein Man1 OS=Homo sapiens OX=9606 GN=MAN1                      | 3.038721321 |
| High | Q7L1Q6 | Basic leucine zipper and W2 domain-containing protein 1 OS=Homo sapiens OX=9606          | 3.037274282 |
| High | Q86UK7 | E3 ubiquitin-protein ligase ZNF598 OS=Homo sapiens OX=9606 GN=ZNF598                     | 3.029327757 |
| High | Q8N122 | Regulatory-associated protein of mTOR OS=Homo sapiens OX=9606 GN=RAPTOR                  | 3.02086153  |
| High | P26358 | DNA (cytosine-5)-methyltransferase 1 OS=Homo sapiens OX=9606 GN=DNMT1                    | 3.016911615 |
| High | Q96P47 | Arf-GAP with GTPase, ANK repeat and PH domain-containing protein OS=Homo sapiens OX=9606 | 3.007667441 |
| High | P28288 | ATP-binding cassette sub-family D member 3 OS=Homo sapiens OX=9606 GN=ABCC3              | 3.005594853 |
| High | Q13867 | Bleomycin hydrolase OS=Homo sapiens OX=9606 GN=BLM                                       | 3.003488328 |
| High | Q96HA7 | Tonsoku-like protein OS=Homo sapiens OX=9606 GN=TONSOKU                                  | 2.996970529 |
| High | Q7L0Y3 | tRNA methyltransferase 10 homolog C OS=Homo sapiens OX=9606 GN=TRMT10C                   | 2.992584128 |
| High | Q8N201 | Integrator complex subunit 1 OS=Homo sapiens OX=9606 GN=INTS1                            | 2.985479461 |
| High | P53004 | Biliverdin reductase A OS=Homo sapiens OX=9606 GN=BILR1A                                 | 2.978810701 |
| High | P00918 | Carbonic anhydrase 2 OS=Homo sapiens OX=9606 GN=CA2                                      | 2.964570262 |
| High | Q7Z6B7 | SLIT-ROBO Rho GTPase-activating protein 1 OS=Homo sapiens OX=9606                        | 2.962175249 |
| High | Q7Z478 | ATP-dependent RNA helicase DHX29 OS=Homo sapiens OX=9606 GN=DHX29                        | 2.938547521 |
| High | P42677 | 40S ribosomal protein S27 OS=Homo sapiens OX=9606 GN=S27                                 | 2.934420285 |
| High | Q53EL6 | Programmed cell death protein 4 OS=Homo sapiens OX=9606 GN=PCD4                          | 2.933674075 |
| High | Q9H3N1 | Thioredoxin-related transmembrane protein 1 OS=Homo sapiens OX=9606                      | 2.92885471  |
| High | P55039 | Developmentally-regulated GTP-binding protein 2 OS=Homo sapiens OX=9606                  | 2.926648298 |
| High | O94776 | Metastasis-associated protein MTA2 OS=Homo sapiens OX=9606 GN=MTA2                       | 2.923359556 |
| High | Q9Y6X4 | Soluble lamin-associated protein of 75 kDa OS=Homo sapiens OX=9606                       | 2.920456993 |
| High | Q8WX92 | Negative elongation factor B OS=Homo sapiens OX=9606 GN=NEFB                             | 2.913996294 |
| High | Q6PIW4 | Fidgetin-like protein 1 OS=Homo sapiens OX=9606 GN=FLN1                                  | 2.913996294 |
| High | P00846 | ATP synthase subunit a OS=Homo sapiens OX=9606 GN=ATP5A                                  | 2.897909474 |
| High | Q96RT8 | Gamma-tubulin complex component 5 OS=Homo sapiens OX=9606 GN=GCC5                        | 2.888737486 |
| High | P18669 | Phosphoglycerate mutase 1 OS=Homo sapiens OX=9606 GN=PFKM1                               | 2.886390849 |
| High | Q15942 | Zyxin OS=Homo sapiens OX=9606 GN=ZYX PE=1 SV=1                                           | 2.884722409 |
| High | Q7Z2Y8 | Interferon-induced very large GTPase 1 OS=Homo sapiens OX=9606                           | 2.86710023  |
| High | Q15054 | DNA polymerase delta subunit 3 OS=Homo sapiens OX=9606 GN=POL32                          | 2.844360366 |
| High | O94979 | Protein transport protein Sec31A OS=Homo sapiens OX=9606 GN=SEC31A                       | 2.838033384 |
| High | P61421 | V-type proton ATPase subunit d 1 OS=Homo sapiens OX=9606 GN=V-ATPase                     | 2.831502516 |
| High | Q8NCE2 | Myotubularin-related protein 14 OS=Homo sapiens OX=9606 GN=MTOR14                        | 2.823330067 |
| High | O43819 | Protein SCO2 homolog, mitochondrial OS=Homo sapiens OX=9606                              | 2.818728228 |

|      |        |                                                                                                                           |             |
|------|--------|---------------------------------------------------------------------------------------------------------------------------|-------------|
| High | O95394 | Phosphoacetylglucosamine mutase OS=Homo sapiens OX=9606 GN=                                                               | 2.81693126  |
| High | Q9UJC3 | Protein Hook homolog 1 OS=Homo sapiens OX=9606 GN=                                                                        | 2.812730622 |
| High | P09429 | High mobility group protein B1 OS=Homo sapiens OX=9606 GN=                                                                | 2.808548986 |
| High | P25490 | Transcriptional repressor protein YY1 OS=Homo sapiens OX=9606 GN=                                                         | 2.80161787  |
| High | Q96SU4 | Oxysterol-binding protein-related protein 9 OS=Homo sapiens OX=9606 GN=                                                   | 2.799970733 |
| High | P82673 | 28S ribosomal protein S35, mitochondrial OS=Homo sapiens OX=9606 GN=                                                      | 2.796423225 |
| High | Q15746 | Myosin light chain kinase, smooth muscle OS=Homo sapiens OX=9606 GN=                                                      | 2.791021483 |
| High | P62937 | Peptidyl-prolyl cis-trans isomerase A OS=Homo sapiens OX=9606 GN=                                                         | 2.788345599 |
| High | O15381 | Nuclear valosin-containing protein-like OS=Homo sapiens OX=9606 GN=                                                       | 2.779368981 |
| High | Q9Y5A7 | NEDD8 ultimate buster 1 OS=Homo sapiens OX=9606 GN=                                                                       | 2.777803954 |
| High | P31350 | Ribonucleoside-diphosphate reductase subunit M2 OS=Homo sapiens OX=9606 GN=                                               | 2.771856392 |
| High | P28072 | Proteasome subunit beta type-6 OS=Homo sapiens OX=9606 GN=                                                                | 2.770574152 |
| High | Q7Z4S6 | Kinesin-like protein KIF21A OS=Homo sapiens OX=9606 GN=                                                                   | 2.766242637 |
| High | P08243 | Asparagine synthetase [glutamine-hydrolyzing] OS=Homo sapiens OX=9606 GN=                                                 | 2.759700418 |
| High | Q9BTE7 | DCN1-like protein 5 OS=Homo sapiens OX=9606 GN=DCN1 PE=1 SV=1                                                             | 2.758204569 |
| High | P67812 | Signal peptidase complex catalytic subunit SEC11A OS=Homo sapiens OX=9606 GN=                                             | 2.754487332 |
| High | P42766 | 60S ribosomal protein L35 OS=Homo sapiens OX=9606 GN=                                                                     | 2.753994096 |
| High | Q96IJ6 | Mannose-1-phosphate guanyltransferase alpha OS=Homo sapiens OX=9606 GN=                                                   | 2.750513758 |
| High | Q9H4L7 | SWI/SNF-related matrix-associated actin-dependent regulator of chromatin subfamily A member 1 OS=Homo sapiens OX=9606 GN= | 2.747891366 |
| High | Q9BYW2 | Histone-lysine N-methyltransferase SETD2 OS=Homo sapiens OX=9606 GN=                                                      | 2.743522794 |
| High | A6NHQ2 | rRNA/tRNA 2'-O-methyltransferase fibrillar-like protein OS=Homo sapiens OX=9606 GN=                                       | 2.739213331 |
| High | Q9UBB9 | Tuftelin-interacting protein 11 OS=Homo sapiens OX=9606 GN=                                                               | 2.732593581 |
| High | Q14254 | Flotillin-2 OS=Homo sapiens OX=9606 GN=FLOT2 PE=1 SV=1                                                                    | 2.714217726 |
| High | Q00796 | Sorbitol dehydrogenase OS=Homo sapiens OX=9606 GN=                                                                        | 2.71354353  |
| High | P45954 | Short/branched chain specific acyl-CoA dehydrogenase, mitochondrial OS=Homo sapiens OX=9606 GN=                           | 2.709297757 |
| High | Q9UBT7 | Alpha-catulin OS=Homo sapiens OX=9606 GN=CTNNAL1 PE=1 SV=1                                                                | 2.694863681 |
| High | O15031 | Plexin-B2 OS=Homo sapiens OX=9606 GN=PLXNB2 PE=1 SV=1                                                                     | 2.684239509 |
| High | Q96PU5 | E3 ubiquitin-protein ligase NEDD4-like OS=Homo sapiens OX=9606 GN=                                                        | 2.681936665 |
| High | Q96RS0 | Trimethylguanosine synthase OS=Homo sapiens OX=9606 GN=                                                                   | 2.677780705 |
| High | Q8N1G4 | Leucine-rich repeat-containing protein 47 OS=Homo sapiens OX=9606 GN=                                                     | 2.677160727 |
| High | Q93050 | V-type proton ATPase 116 kDa subunit a isoform 1 OS=Homo sapiens OX=9606 GN=                                              | 2.673459331 |
| High | Q01804 | OTU domain-containing protein 4 OS=Homo sapiens OX=9606 GN=                                                               | 2.671824339 |
| High | P82930 | 28S ribosomal protein S34, mitochondrial OS=Homo sapiens OX=9606 GN=                                                      | 2.670602121 |
| High | Q08170 | Serine/arginine-rich splicing factor 4 OS=Homo sapiens OX=9606 GN=                                                        | 2.664141089 |
| High | P00491 | Purine nucleoside phosphorylase OS=Homo sapiens OX=9606 GN=                                                               | 2.661543506 |
| High | Q16527 | Cysteine and glycine-rich protein 2 OS=Homo sapiens OX=9606 GN=                                                           | 2.660747366 |
| High | Q9P0I2 | ER membrane protein complex subunit 3 OS=Homo sapiens OX=9606 GN=                                                         | 2.639785387 |
| High | Q8TCT9 | Minor histocompatibility antigen H13 OS=Homo sapiens OX=9606 GN=                                                          | 2.632830511 |
| High | Q9BYG3 | MKI67 FHA domain-interacting nucleolar phosphoprotein OS=Homo sapiens OX=9606 GN=                                         | 2.630413109 |
| High | Q92990 | Glomulin OS=Homo sapiens OX=9606 GN=GLMN PE=1 SV=1                                                                        | 2.625434939 |
| High | O75832 | 26S proteasome non-ATPase regulatory subunit 10 OS=Homo sapiens OX=9606 GN=                                               | 2.622147781 |
| High | Q9NYJ8 | TGF-beta-activated kinase 1 and MAP3K7-binding protein OS=Homo sapiens OX=9606 GN=                                        | 2.61960784  |
| High | Q96TA1 | Niban-like protein 1 OS=Homo sapiens OX=9606 GN=FAM107B PE=1 SV=1                                                         | 2.614751318 |
| High | Q9Y4J8 | Dystrobrevin alpha OS=Homo sapiens OX=9606 GN=DTNB PE=1 SV=1                                                              | 2.591929714 |
| High | Q07065 | Cytoskeleton-associated protein 4 OS=Homo sapiens OX=9606 GN=                                                             | 2.587707491 |
| High | Q15645 | Pachytene checkpoint protein 2 homolog OS=Homo sapiens OX=9606 GN=                                                        | 2.573326112 |
| High | Q96PU8 | Protein quaking OS=Homo sapiens OX=9606 GN=QKI PE=1 SV=1                                                                  | 2.562090964 |

|      |        |                                                         |             |
|------|--------|---------------------------------------------------------|-------------|
| High | Q8TCJ2 | Dolichyl-diphosphooligosaccharide--protein glycosyltran | 2.56082526  |
| High | P62851 | 40S ribosomal protein S25 OS=Homo sapiens OX=9606 G     | 2.548981548 |
| High | Q92542 | Nicastrin OS=Homo sapiens OX=9606 GN=NCSTN PE=1 S       | 2.541211118 |
| High | P68431 | Histone H3.1 OS=Homo sapiens OX=9606 GN=HIST1H3A        | 2.540402959 |
| High | P49406 | 39S ribosomal protein L19, mitochondrial OS=Homo sapi   | 2.531948209 |
| High | Q9BZE9 | Tether containing UBX domain for GLUT4 OS=Homo sapi     | 2.500746315 |
| High | Q8WX93 | Palladin OS=Homo sapiens OX=9606 GN=PALLD PE=1 SV:      | 2.500038134 |
| High | P04181 | Ornithine aminotransferase, mitochondrial OS=Homo sa    | 2.500038134 |
| High | Q5SRE5 | Nucleoporin NUP188 homolog OS=Homo sapiens OX=96        | 2.495937117 |
| High | Q13595 | Transformer-2 protein homolog alpha OS=Homo sapiens     | 2.491335637 |
| High | O43813 | LanC-like protein 1 OS=Homo sapiens OX=9606 GN=LAN      | 2.484921325 |
| High | Q8ND83 | SLAIN motif-containing protein 1 OS=Homo sapiens OX=9   | 2.482276405 |
| High | Q13586 | Stromal interaction molecule 1 OS=Homo sapiens OX=96    | 2.479254528 |
| High | O15357 | Phosphatidylinositol 3,4,5-trisphosphate 5-phosphatase  | 2.474436942 |
| High | Q15345 | Leucine-rich repeat-containing protein 41 OS=Homo sapi  | 2.459670525 |
| High | Q9NXE4 | Sphingomyelin phosphodiesterase 4 OS=Homo sapiens C     | 2.458795309 |
| High | P33981 | Dual specificity protein kinase TTK OS=Homo sapiens OX: | 2.44551084  |
| High | P51610 | Host cell factor 1 OS=Homo sapiens OX=9606 GN=HCFC1     | 2.441651491 |
| High | Q9ULE4 | Protein FAM184B OS=Homo sapiens OX=9606 GN=FAM1         | 2.420902673 |
| High | P50851 | Lipopolysaccharide-responsive and beige-like anchor pro | 2.41408829  |
| High | Q9BYD2 | 39S ribosomal protein L9, mitochondrial OS=Homo sapie   | 2.40263395  |
| High | P51003 | Poly(A) polymerase alpha OS=Homo sapiens OX=9606 GI     | 2.39968067  |
| High | Q9BUT1 | 3-hydroxybutyrate dehydrogenase type 2 OS=Homo sapi     | 2.398265852 |
| High | Q9NR31 | GTP-binding protein SAR1a OS=Homo sapiens OX=9606 C     | 2.39631445  |
| High | P62753 | 40S ribosomal protein S6 OS=Homo sapiens OX=9606 GN     | 2.388170521 |
| High | O15085 | Rho guanine nucleotide exchange factor 11 OS=Homo sa    | 2.38563016  |
| High | Q969V6 | Myocardin-related transcription factor A OS=Homo sapie  | 2.375614759 |
| High | Q15363 | Transmembrane emp24 domain-containing protein 2 OS      | 2.375614759 |
| High | P21399 | Cytoplasmic aconitate hydratase OS=Homo sapiens OX=9    | 2.372224625 |
| High | O75475 | PC4 and SFRS1-interacting protein OS=Homo sapiens OX:   | 2.371713269 |
| High | Q9UBE0 | SUMO-activating enzyme subunit 1 OS=Homo sapiens OX     | 2.370284667 |
| High | Q9NRL3 | Striatin-4 OS=Homo sapiens OX=9606 GN=STRN4 PE=1 S      | 2.369063881 |
| High | P13473 | Lysosome-associated membrane glycoprotein 2 OS=Homo     | 2.361510743 |
| High | P19623 | Spermidine synthase OS=Homo sapiens OX=9606 GN=SR       | 2.360912129 |
| High | Q8N442 | Translation factor GUF1, mitochondrial OS=Homo sapien   | 2.355758414 |
| High | Q9Y3Y2 | Chromatin target of PRMT1 protein OS=Homo sapiens O     | 2.334231449 |
| High | P17152 | Transmembrane protein 11, mitochondrial OS=Homo sa      | 2.327625021 |
| High | Q9BQN1 | Protein FAM83C OS=Homo sapiens OX=9606 GN=FAM83         | 2.320481256 |
| High | O43301 | Heat shock 70 kDa protein 12A OS=Homo sapiens OX=96     | 2.318939756 |
| High | P07237 | Protein disulfide-isomerase OS=Homo sapiens OX=9606     | 2.315962963 |
| High | Q5J8M3 | ER membrane protein complex subunit 4 OS=Homo sapi      | 2.284414448 |
| High | P01859 | Immunoglobulin heavy constant gamma 2 OS=Homo sap       | 2.281332265 |
| High | Q9UHP3 | Ubiquitin carboxyl-terminal hydrolase 25 OS=Homo sapie  | 2.264038009 |
| High | Q14527 | Helicase-like transcription factor OS=Homo sapiens OX=9 | 2.250650239 |
| High | Q6P996 | Pyridoxal-dependent decarboxylase domain-containing p   | 2.245575211 |
| High | Q9NXS2 | Glutaminyl-peptide cyclotransferase-like protein OS=Hor | 2.229958446 |
| High | P61247 | 40S ribosomal protein S3a OS=Homo sapiens OX=9606 G     | 2.22562904  |

|        |        |                                                         |             |
|--------|--------|---------------------------------------------------------|-------------|
| High   | Q6P158 | Putative ATP-dependent RNA helicase DHX57 OS=Homo       | 2.211690188 |
| High   | Q96H55 | Unconventional myosin-XIX OS=Homo sapiens OX=9606       | 2.209081805 |
| High   | P61353 | 60S ribosomal protein L27 OS=Homo sapiens OX=9606 G     | 2.207818504 |
| High   | O15047 | Histone-lysine N-methyltransferase SETD1A OS=Homo sa    | 2.18276527  |
| High   | Q9Y6N7 | Roundabout homolog 1 OS=Homo sapiens OX=9606 GN=        | 2.16481693  |
| High   | Q12792 | Twinfilin-1 OS=Homo sapiens OX=9606 GN=TWF1 PE=1 S      | 2.160396271 |
| High   | O00541 | Pescadillo homolog OS=Homo sapiens OX=9606 GN=PES       | 2.151072287 |
| High   | Q6YHU6 | Thyroid adenoma-associated protein OS=Homo sapiens (    | 2.148497047 |
| High   | Q9UIW2 | Plexin-A1 OS=Homo sapiens OX=9606 GN=PLXNA1 PE=1        | 2.147215131 |
| High   | Q8WYA6 | Beta-catenin-like protein 1 OS=Homo sapiens OX=9606 C   | 2.13430394  |
| High   | O43164 | E3 ubiquitin-protein ligase Praja-2 OS=Homo sapiens OX= | 2.131825959 |
| High   | Q9UBS4 | DnaJ homolog subfamily B member 11 OS=Homo sapien       | 2.120617363 |
| High   | Q9NZJ7 | Mitochondrial carrier homolog 1 OS=Homo sapiens OX=9    | 2.118786584 |
| High   | P60900 | Proteasome subunit alpha type-6 OS=Homo sapiens OX=     | 2.117931056 |
| High   | Q68BL7 | Olfactomedin-like protein 2A OS=Homo sapiens OX=960     | 2.095933948 |
| High   | Q96NW4 | Ankyrin repeat domain-containing protein 27 OS=Homo     | 2.094419972 |
| High   | P62888 | 60S ribosomal protein L30 OS=Homo sapiens OX=9606 G     | 2.088895682 |
| High   | P07384 | Calpain-1 catalytic subunit OS=Homo sapiens OX=9606 G   | 2.08639805  |
| High   | P62263 | 40S ribosomal protein S14 OS=Homo sapiens OX=9606 G     | 2.086239114 |
| High   | Q9NX46 | Poly(ADP-ribose) glycohydrolase ARH3 OS=Homo sapien     | 2.07654873  |
| High   | Q15070 | Mitochondrial inner membrane protein OXA1L OS=Homo      | 2.075772419 |
| High   | P57088 | Transmembrane protein 33 OS=Homo sapiens OX=9606        | 2.05764465  |
| High   | Q9UPN7 | Serine/threonine-protein phosphatase 6 regulatory subu  | 2.054334501 |
| High   | Q9UBD5 | Origin recognition complex subunit 3 OS=Homo sapiens (  | 2.031750606 |
| High   | Q16513 | Serine/threonine-protein kinase N2 OS=Homo sapiens O    | 2.025396208 |
| High   | P56545 | C-terminal-binding protein 2 OS=Homo sapiens OX=9606    | 2.014259259 |
| High   | O60830 | Mitochondrial import inner membrane translocase subu    | 2.01407978  |
| High   | Q96K76 | Ubiquitin carboxyl-terminal hydrolase 47 OS=Homo sapie  | 2.012199714 |
| High   | P61009 | Signal peptidase complex subunit 3 OS=Homo sapiens O    | 2.001566281 |
| High   | Q13330 | Metastasis-associated protein MTA1 OS=Homo sapiens C    | 1.982966661 |
| High   | Q9Y3D9 | 28S ribosomal protein S23, mitochondrial OS=Homo sapi   | 1.97798426  |
| High   | Q969X5 | Endoplasmic reticulum-Golgi intermediate compartment    | 1.974694135 |
| High   | Q7Z739 | YTH domain-containing family protein 3 OS=Homo sapie    | 1.973058372 |
| High   | Q9Y312 | Protein AAR2 homolog OS=Homo sapiens OX=9606 GN=        | 1.958607315 |
| High   | Q9BY32 | Inosine triphosphate pyrophosphatase OS=Homo sapien     | 1.943857738 |
| Medium | O60645 | Exocyst complex component 3 OS=Homo sapiens OX=96       | 1.924088239 |
| Medium | Q9UBK8 | Methionine synthase reductase OS=Homo sapiens OX=9      | 1.924088239 |
| Medium | Q07021 | Complement component 1 Q subcomponent-binding pro       | 1.903437562 |
| Medium | Q9H0A0 | RNA cytidine acetyltransferase OS=Homo sapiens OX=96    | 1.897566294 |
| Medium | Q05086 | Ubiquitin-protein ligase E3A OS=Homo sapiens OX=9606    | 1.883392256 |
| Medium | P52790 | Hexokinase-3 OS=Homo sapiens OX=9606 GN=HK3 PE=1        | 1.864231485 |
| Medium | P61160 | Actin-related protein 2 OS=Homo sapiens OX=9606 GN=     | 1.863279433 |
| Medium | P40222 | Alpha-taxilin OS=Homo sapiens OX=9606 GN=TXLNA PE=      | 1.853871964 |
| Medium | Q96JG6 | Syndetin OS=Homo sapiens OX=9606 GN=VPS50 PE=1 SV       | 1.851705903 |
| Medium | O75127 | Pentatricopeptide repeat-containing protein 1, mitochor | 1.815024809 |
| Medium | P27694 | Replication protein A 70 kDa DNA-binding subunit OS=Hc  | 1.81417464  |
| Medium | P09661 | U2 small nuclear ribonucleoprotein A' OS=Homo sapiens   | 1.809108283 |

|        |        |                                                             |             |
|--------|--------|-------------------------------------------------------------|-------------|
| Medium | Q9BZE4 | Nucleolar GTP-binding protein 1 OS=Homo sapiens OX=9        | 1.791827473 |
| Medium | Q9UP83 | Conserved oligomeric Golgi complex subunit 5 OS=Homoc       | 1.784098187 |
| Medium | Q86V48 | Leucine zipper protein 1 OS=Homo sapiens OX=9606 GN:        | 1.779891912 |
| Medium | O15042 | U2 snRNP-associated SURP motif-containing protein OS=       | 1.777283529 |
| Medium | P08579 | U2 small nuclear ribonucleoprotein B'' OS=Homo sapiens      | 1.755722879 |
| Medium | O75608 | Acyl-protein thioesterase 1 OS=Homo sapiens OX=9606 (       | 1.727926212 |
| Medium | Q8NEB9 | Phosphatidylinositol 3-kinase catalytic subunit type 3 OS   | 1.716472635 |
| Medium | Q5JTH9 | RRP12-like protein OS=Homo sapiens OX=9606 GN=RRP1          | 1.699839463 |
| Medium | Q9NV70 | Exocyst complex component 1 OS=Homo sapiens OX=96           | 1.681519275 |
| Medium | O00505 | Importin subunit alpha-4 OS=Homo sapiens OX=9606 GN         | 1.68006156  |
| Medium | Q8NB78 | Lysine-specific histone demethylase 1B OS=Homo sapien       | 1.675100503 |
| Medium | Q9NNW5 | WD repeat-containing protein 6 OS=Homo sapiens OX=9         | 1.666351243 |
| Medium | Q9ULC4 | Malignant T-cell-amplified sequence 1 OS=Homo sapiens       | 1.644740094 |
| Medium | Q6L8Q7 | 2',5'-phosphodiesterase 12 OS=Homo sapiens OX=9606 (        | 1.64454848  |
| Medium | P06756 | Integrin alpha-V OS=Homo sapiens OX=9606 GN=ITGAV I         | 1.64244628  |
| Medium | B2RTY4 | Unconventional myosin-IXa OS=Homo sapiens OX=9606           | 1.639785387 |
| Medium | Q9BQ69 | O-acetyl-ADP-ribose deacetylase MACROD1 OS=Homo sa          | 1.634512015 |
| Medium | Q99961 | Endophilin-A2 OS=Homo sapiens OX=9606 GN=SH3GL1 F           | 1.632271454 |
| Medium | P36957 | Dihydrolipoyllysine-residue succinyltransferase compone     | 1.613679426 |
| Medium | Q6NW34 | Nucleolus and neural progenitor protein OS=Homo sapie       | 1.603277721 |
| Medium | Q9Y697 | Cysteine desulfurase, mitochondrial OS=Homo sapiens O       | 1.60119227  |
| Medium | Q9BTX1 | Nucleoporin NDC1 OS=Homo sapiens OX=9606 GN=NDC             | 1.601018933 |
| Medium | Q9NZJ5 | Eukaryotic translation initiation factor 2-alpha kinase 3 C | 1.565590792 |
| Medium | P09936 | Ubiquitin carboxyl-terminal hydrolase isozyme L1 OS=Ho      | 1.564314862 |
| Medium | Q01433 | AMP deaminase 2 OS=Homo sapiens OX=9606 GN=AMP              | 1.559878397 |
| Medium | Q8WWY3 | U4/U6 small nuclear ribonucleoprotein Prp31 OS=Homo         | 1.556111453 |
| Medium | Q9GZZ1 | N-alpha-acetyltransferase 50 OS=Homo sapiens OX=9606        | 1.552067134 |
| Medium | Q92618 | Zinc finger protein 516 OS=Homo sapiens OX=9606 GN=Z        | 1.546834607 |
| Medium | P19388 | DNA-directed RNA polymerases I, II, and III subunit RPAB    | 1.540456742 |
| Medium | O43681 | ATPase ASNA1 OS=Homo sapiens OX=9606 GN=ASNA1 P             | 1.518270803 |
| Medium | P50225 | Sulfotransferase 1A1 OS=Homo sapiens OX=9606 GN=SU          | 1.516698048 |
| Medium | A6NKC9 | SH2 domain-containing protein 7 OS=Homo sapiens OX=         | 1.515415471 |
| Medium | Q9Y467 | Sal-like protein 2 OS=Homo sapiens OX=9606 GN=SALL2         | 1.507099989 |
| Medium | P19474 | E3 ubiquitin-protein ligase TRIM21 OS=Homo sapiens OX       | 1.503070352 |
| Medium | Q01081 | Splicing factor U2AF 35 kDa subunit OS=Homo sapiens O       | 1.491335637 |
| Medium | Q5VT52 | Regulation of nuclear pre-mRNA domain-containing prot       | 1.490663042 |
| Medium | O15020 | Spectrin beta chain, non-erythrocytic 2 OS=Homo sapien      | 1.487715937 |
| Medium | P02765 | Alpha-2-HS-glycoprotein OS=Homo sapiens OX=9606 GN          | 1.482672118 |
| Medium | Q9NZP5 | Olfactory receptor 5AC2 OS=Homo sapiens OX=9606 GN          | 1.474825572 |
| Medium | P15153 | Ras-related C3 botulinum toxin substrate 2 OS=Homo sa       | 1.465719995 |
| Medium | Q9UM00 | Calcium load-activated calcium channel OS=Homo sapier       | 1.465466244 |
| Medium | P21359 | Neurofibromin OS=Homo sapiens OX=9606 GN=NF1 PE=            | 1.462306806 |
| Medium | O75069 | Transmembrane and coiled-coil domains protein 2 OS=H        | 1.449894001 |
| Medium | P46776 | 60S ribosomal protein L27a OS=Homo sapiens OX=9606          | 1.436756299 |
| Medium | Q96B67 | Arrestin domain-containing protein 3 OS=Homo sapiens        | 1.435926021 |
| Medium | Q96G21 | U3 small nucleolar ribonucleoprotein protein IMP4 OS=H      | 1.429223631 |
| Medium | Q8WUF5 | RelA-associated inhibitor OS=Homo sapiens OX=9606 GN        | 1.418164076 |

|        |        |                                                                                                                                     |             |
|--------|--------|-------------------------------------------------------------------------------------------------------------------------------------|-------------|
| Medium | Q9UFF9 | CCR4-NOT transcription complex subunit 8 OS=Homo sapiens OX=9606 GN=CCR4 NOT1 PE=1 SV=4                                             | 1.417822962 |
| Medium | Q13188 | Serine/threonine-protein kinase 3 OS=Homo sapiens OX=9606 GN=SRK3 PE=1 SV=4                                                         | 1.40428338  |
| Medium | Q5TCZ1 | SH3 and PX domain-containing protein 2A OS=Homo sapiens OX=9606 GN=SH3PX2A PE=1 SV=4                                                | 1.400772137 |
| Medium | Q9BYT8 | Neurolysin, mitochondrial OS=Homo sapiens OX=9606 GN=NEUROLYSIN PE=1 SV=4                                                           | 1.398483216 |
| Medium | O43683 | Mitotic checkpoint serine/threonine-protein kinase BUB1 OS=Homo sapiens OX=9606 GN=BUB1 PE=1 SV=4                                   | 1.387958255 |
| Medium | Q9H2X9 | Solute carrier family 12 member 5 OS=Homo sapiens OX=9606 GN=SLC12A5 PE=1 SV=4                                                      | 1.380384994 |
| Medium | Q14966 | Zinc finger protein 638 OS=Homo sapiens OX=9606 GN=ZFP638 PE=1 SV=4                                                                 | 1.374584648 |
| Medium | Q13033 | Striatin-3 OS=Homo sapiens OX=9606 GN=STRN3 PE=1 SV=4                                                                               | 1.346594509 |
| Medium | Q9Y5Q9 | General transcription factor 3C polypeptide 3 OS=Homo sapiens OX=9606 GN=TFIIIC3 PE=1 SV=4                                          | 1.33733659  |
| Medium | Q9P2R7 | Succinate--CoA ligase [ADP-forming] subunit beta, mitochondrial OS=Homo sapiens OX=9606 GN=SUCCINATE COA LIASE PE=1 SV=4            | 1.335170059 |
| Medium | O75190 | DnaJ homolog subfamily B member 6 OS=Homo sapiens OX=9606 GN=DNAJ6 PE=1 SV=4                                                        | 1.330962199 |
| Medium | Q8WXE9 | Stonin-2 OS=Homo sapiens OX=9606 GN=STON2 PE=1 SV=4                                                                                 | 1.321299565 |
| Medium | Q3SY69 | Mitochondrial 10-formyltetrahydrofolate dehydrogenase OS=Homo sapiens OX=9606 GN=10-FORMYLTHETRAHYDROFOLATE DEHYDROGENASE PE=1 SV=4 | 1.320662969 |
| Medium | Q9H936 | Mitochondrial glutamate carrier 1 OS=Homo sapiens OX=9606 GN=GLUTAMATE CARRIER PE=1 SV=4                                            | 1.313989709 |
| Medium | A3KMH1 | von Willebrand factor A domain-containing protein 8 OS=Homo sapiens OX=9606 GN=VWF PE=1 SV=4                                        | 1.31264943  |
| Medium | P25788 | Proteasome subunit alpha type-3 OS=Homo sapiens OX=9606 GN=PSMA3 PE=1 SV=4                                                          | 1.312114475 |
| Medium | Q13615 | Myotubularin-related protein 3 OS=Homo sapiens OX=9606 GN=MYOTUBULARIN RELATED PROTEIN PE=1 SV=4                                    | 1.291324207 |
| Medium | Q8N0U8 | Vitamin K epoxide reductase complex subunit 1-like protein OS=Homo sapiens OX=9606 GN=VKORC1 PE=1 SV=4                              | 1.279179418 |
| Medium | P02788 | Lactotransferrin OS=Homo sapiens OX=9606 GN=LTF PE=1 SV=4                                                                           | 1.278024598 |
| Medium | P07203 | Glutathione peroxidase 1 OS=Homo sapiens OX=9606 GN=GPX1 PE=1 SV=4                                                                  | 1.272377422 |
| Medium | Q8NCA5 | Protein FAM98A OS=Homo sapiens OX=9606 GN=FAM98A PE=1 SV=4                                                                          | 1.271808601 |
| Medium | Q9UL03 | Integrator complex subunit 6 OS=Homo sapiens OX=9606 GN=INTS6 PE=1 SV=4                                                             | 1.262489309 |
| Medium | O43395 | U4/U6 small nuclear ribonucleoprotein Prp3 OS=Homo sapiens OX=9606 GN=PRP3 PE=1 SV=4                                                | 1.254300773 |
| Medium | Q15691 | Microtubule-associated protein RP/EB family member 1 OS=Homo sapiens OX=9606 GN=MAPRE1 PE=1 SV=4                                    | 1.254300773 |
| Medium | O94988 | Protein FAM13A OS=Homo sapiens OX=9606 GN=FAM13A PE=1 SV=4                                                                          | 1.253287977 |
| Medium | P46063 | ATP-dependent DNA helicase Q1 OS=Homo sapiens OX=9606 GN=XPB PE=1 SV=4                                                              | 1.2486439   |
| Medium | P78316 | Nucleolar protein 14 OS=Homo sapiens OX=9606 GN=NCN14 PE=1 SV=4                                                                     | 1.240332155 |
| Medium | Q9Y2W6 | Tudor and KH domain-containing protein OS=Homo sapiens OX=9606 GN=TUDOR KH PE=1 SV=4                                                | 1.217957583 |
| Medium | Q4V328 | GRIP1-associated protein 1 OS=Homo sapiens OX=9606 GN=GRIP1 PE=1 SV=4                                                               | 1.216310764 |
| Medium | O43815 | Striatin OS=Homo sapiens OX=9606 GN=STRN PE=1 SV=4                                                                                  | 1.211973116 |
| Medium | Q86YT6 | E3 ubiquitin-protein ligase MIB1 OS=Homo sapiens OX=9606 GN=MIB1 PE=1 SV=4                                                          | 1.205302873 |
| Medium | Q969S9 | Ribosome-releasing factor 2, mitochondrial OS=Homo sapiens OX=9606 GN=RRF2 PE=1 SV=4                                                | 1.202040356 |
| Medium | P13798 | Acylamino-acid-releasing enzyme OS=Homo sapiens OX=9606 GN=ACYLAMINO ACID RELEASING ENZYME PE=1 SV=4                                | 1.198047765 |
| Medium | Q9NYF8 | Bcl-2-associated transcription factor 1 OS=Homo sapiens OX=9606 GN=BTAF1 PE=1 SV=4                                                  | 1.196884445 |
| Medium | Q15118 | [Pyruvate dehydrogenase (acetyl-transferring)] kinase isoform 1 OS=Homo sapiens OX=9606 GN=PDHK1 PE=1 SV=4                          | 1.191789027 |
| Medium | Q9HBF4 | Zinc finger FYVE domain-containing protein 1 OS=Homo sapiens OX=9606 GN=ZFYVE1 PE=1 SV=4                                            | 1.176982477 |
| Medium | Q3V6T2 | Girdin OS=Homo sapiens OX=9606 GN=CCDC88A PE=1 SV=4                                                                                 | 1.165833716 |
| Medium | Q9H8M5 | Metal transporter CNNM2 OS=Homo sapiens OX=9606 GN=CNNM2 PE=1 SV=4                                                                  | 1.163739197 |
| Medium | Q96S55 | ATPase WRNIP1 OS=Homo sapiens OX=9606 GN=WRNIP1 PE=1 SV=4                                                                           | 1.154467883 |
| Medium | P51114 | Fragile X mental retardation syndrome-related protein 1 OS=Homo sapiens OX=9606 GN=FXR1 PE=1 SV=4                                   | 1.138286412 |
| Medium | P62266 | 40S ribosomal protein S23 OS=Homo sapiens OX=9606 GN=RPS23 PE=1 SV=4                                                                | 1.135370275 |
| Medium | P25685 | DnaJ homolog subfamily B member 1 OS=Homo sapiens OX=9606 GN=DNAJ1 PE=1 SV=4                                                        | 1.113227357 |
| Low    | Q96HS1 | Serine/threonine-protein phosphatase PGAM5, mitochondrial OS=Homo sapiens OX=9606 GN=PGAM5 PE=1 SV=4                                | 1.099086932 |
| Low    | Q9BXR6 | Complement factor H-related protein 5 OS=Homo sapiens OX=9606 GN=CFHR5 PE=1 SV=4                                                    | 1.093557206 |
| Low    | O75915 | PRA1 family protein 3 OS=Homo sapiens OX=9606 GN=PRA1 PE=1 SV=4                                                                     | 1.09350334  |
| Low    | P06280 | Alpha-galactosidase A OS=Homo sapiens OX=9606 GN=GAALD1 PE=1 SV=4                                                                   | 1.089642443 |
| Low    | Q6ZUM4 | Rho GTPase-activating protein 27 OS=Homo sapiens OX=9606 GN=RAP27 PE=1 SV=4                                                         | 1.089375595 |

|     |        |                                                          |             |
|-----|--------|----------------------------------------------------------|-------------|
| Low | P49756 | RNA-binding protein 25 OS=Homo sapiens OX=9606 GN=       | 1.076238039 |
| Low | Q93100 | Phosphorylase b kinase regulatory subunit beta OS=Hom    | 1.056950889 |
| Low | Q02790 | Peptidyl-prolyl cis-trans isomerase FKBP4 OS=Homo sapi   | 1.052272273 |
| Low | P62995 | Transformer-2 protein homolog beta OS=Homo sapiens (     | 1.049489107 |
| Low | P42858 | Huntingtin OS=Homo sapiens OX=9606 GN=HTT PE=1 SV        | 1.043639446 |
| Low | Q9H6S0 | 3'-5' RNA helicase YTHDC2 OS=Homo sapiens OX=9606 G      | 1.037299268 |
| Low | Q8IVV2 | Lipoxygenase homology domain-containing protein 1 OS     | 1.020633758 |
| Low | O75717 | WD repeat and HMG-box DNA-binding protein 1 OS=Hor       | 1.015652742 |
| Low | Q9H2V7 | Protein spinster homolog 1 OS=Homo sapiens OX=9606 (     | 1.012557195 |
| Low | Q9NVU7 | Protein SDA1 homolog OS=Homo sapiens OX=9606 GN=9        | 0.997402019 |
| Low | E9PIF3 | Nuclear pore complex-interacting protein family membe    | 0.991399828 |
| Low | P61081 | NEDD8-conjugating enzyme Ubc12 OS=Homo sapiens OX        | 0.991399828 |
| Low | O75976 | Carboxypeptidase D OS=Homo sapiens OX=9606 GN=CPI        | 0.990549104 |
| Low | O94903 | Pyridoxal phosphate homeostasis protein OS=Homo sapi     | 0.988429556 |
| Low | A2A2Z9 | Ankyrin repeat domain-containing protein 18B OS=Homc     | 0.986741335 |
| Low | Q15061 | WD repeat-containing protein 43 OS=Homo sapiens OX=      | 0.984640245 |
| Low | Q8IY81 | pre-rRNA processing protein FTSJ3 OS=Homo sapiens OX     | 0.977159389 |
| Low | O95140 | Mitofusin-2 OS=Homo sapiens OX=9606 GN=MFN2 PE=1         | 0.973466735 |
| Low | Q8IZF6 | Adhesion G-protein coupled receptor G4 OS=Homo sapie     | 0.973058372 |
| Low | Q13630 | GDP-L-fucose synthase OS=Homo sapiens OX=9606 GN=        | 0.962175249 |
| Low | O00567 | Nucleolar protein 56 OS=Homo sapiens OX=9606 GN=NC       | 0.956244873 |
| Low | Q7Z2D5 | Phospholipid phosphatase-related protein type 4 OS=Ho    | 0.955852379 |
| Low | Q96DT7 | Zinc finger and BTB domain-containing protein 10 OS=Hc   | 0.943095149 |
| Low | Q8N5V2 | Ephexin-1 OS=Homo sapiens OX=9606 GN=NGEF PE=1 SV        | 0.942714356 |
| Low | P51398 | 28S ribosomal protein S29, mitochondrial OS=Homo sapi    | 0.941573976 |
| Low | Q96JB2 | Conserved oligomeric Golgi complex subunit 3 OS=Homc     | 0.936666641 |
| Low | Q76NI1 | Kinase non-catalytic C-lobe domain-containing protein 1  | 0.933674075 |
| Low | Q96EE3 | Nucleoporin SEH1 OS=Homo sapiens OX=9606 GN=SEH1         | 0.932929144 |
| Low | P30085 | UMP-CMP kinase OS=Homo sapiens OX=9606 GN=CMPK           | 0.931814138 |
| Low | Q6F5E8 | Capping protein, Arp2/3 and myosin-I linker protein 2 OS | 0.921543182 |
| Low | Q8N594 | MPN domain-containing protein OS=Homo sapiens OX=9       | 0.920818754 |
| Low | O60884 | DnaJ homolog subfamily A member 2 OS=Homo sapiens        | 0.920095532 |
| Low | Q9BVK6 | Transmembrane emp24 domain-containing protein 9 OS       | 0.919734373 |
| Low | Q9C0D7 | Probable ribonuclease ZC3H12C OS=Homo sapiens OX=9       | 0.919734373 |
