# Supplementary material for: SARS-COV-2 protein NSP9 promotes cytokine production by targeting TBK1
Source: PubMed Central journal article supplement (PMC10580797; doi:10.3389/fimmu.2023.1211816), 2023-10-02
Supplement: Presentation_3.pdf [file Presentation_3.pdf]

| Protein FD | Accession | Description                                              | Sum PEP Score |
|------------|-----------|----------------------------------------------------------|---------------|
| High       | P35579    | Myosin-9 OS=Homo sapiens OX=9606 GN=MYH9 PE=1 SV=        | 763.0065158   |
| High       | P35580    | Myosin-10 OS=Homo sapiens OX=9606 GN=MYH10 PE=1          | 636.8191984   |
| High       | P11586    | C-1-tetrahydrofolate synthase, cytoplasmic OS=Homo sap   | 457.9308364   |
| High       | P78527    | DNA-dependent protein kinase catalytic subunit OS=Hom    | 350.9197509   |
| High       | P08238    | Heat shock protein HSP 90-beta OS=Homo sapiens OX=96     | 329.8288882   |
| High       | P07437    | Tubulin beta chain OS=Homo sapiens OX=9606 GN=TUBB       | 324.699364    |
| High       | P14618    | Pyruvate kinase PKM OS=Homo sapiens OX=9606 GN=PKI       | 321.5560252   |
| High       | P49327    | Fatty acid synthase OS=Homo sapiens OX=9606 GN=FASN      | 321.3229737   |
| High       | P0DMV9    | Heat shock 70 kDa protein 1B OS=Homo sapiens OX=9606     | 311.7574243   |
| High       | Q13885    | Tubulin beta-2A chain OS=Homo sapiens OX=9606 GN=TU      | 310.2571808   |
| High       | Q9BVA1    | Tubulin beta-2B chain OS=Homo sapiens OX=9606 GN=TU      | 310.198711    |
| High       | P68371    | Tubulin beta-4B chain OS=Homo sapiens OX=9606 GN=TU      | 308.3994887   |
| High       | P13639    | Elongation factor 2 OS=Homo sapiens OX=9606 GN=EEF2      | 306.3737239   |
| High       | P06733    | Alpha-enolase OS=Homo sapiens OX=9606 GN=ENO1 PE=        | 274.8862641   |
| High       | P60709    | Actin, cytoplasmic 1 OS=Homo sapiens OX=9606 GN=ACT      | 270.9515805   |
| High       | Q9BQE3    | Tubulin alpha-1C chain OS=Homo sapiens OX=9606 GN=T      | 258.5444055   |
| High       | P04406    | Glyceraldehyde-3-phosphate dehydrogenase OS=Homo s       | 257.8896603   |
| High       | P04350    | Tubulin beta-4A chain OS=Homo sapiens OX=9606 GN=TU      | 245.3052662   |
| High       | P07900    | Heat shock protein HSP 90-alpha OS=Homo sapiens OX=9     | 245.2936182   |
| High       | Q71U36    | Tubulin alpha-1A chain OS=Homo sapiens OX=9606 GN=T      | 241.7498715   |
| High       | Q7Z406    | Myosin-14 OS=Homo sapiens OX=9606 GN=MYH14 PE=1          | 223.6868916   |
| High       | P68104    | Elongation factor 1-alpha 1 OS=Homo sapiens OX=9606 G    | 216.7346862   |
| High       | P11142    | Heat shock cognate 71 kDa protein OS=Homo sapiens OX:    | 215.5153457   |
| High       | P21333    | Filamin-A OS=Homo sapiens OX=9606 GN=FLNA PE=1 SV=       | 210.2919744   |
| High       | P49368    | T-complex protein 1 subunit gamma OS=Homo sapiens O      | 191.1764166   |
| High       | P78371    | T-complex protein 1 subunit beta OS=Homo sapiens OX=9    | 178.2754613   |
| High       | P33993    | DNA replication licensing factor MCM7 OS=Homo sapiens    | 175.5052551   |
| High       | Q14204    | Cytoplasmic dynein 1 heavy chain 1 OS=Homo sapiens OX    | 174.4626362   |
| High       | P48643    | T-complex protein 1 subunit epsilon OS=Homo sapiens O)   | 171.8082943   |
| High       | Q00610    | Clathrin heavy chain 1 OS=Homo sapiens OX=9606 GN=CL     | 168.4384467   |
| High       | P60842    | Eukaryotic initiation factor 4A-I OS=Homo sapiens OX=96  | 159.1127642   |
| High       | P17987    | T-complex protein 1 subunit alpha OS=Homo sapiens OX=    | 159.0053662   |
| High       | P06576    | ATP synthase subunit beta, mitochondrial OS=Homo sapie   | 157.438152    |
| High       | P27708    | CAD protein OS=Homo sapiens OX=9606 GN=CAD PE=1 SV       | 157.0112785   |
| High       | P22314    | Ubiquitin-like modifier-activating enzyme 1 OS=Homo sap  | 155.2700587   |
| High       | Q9BUF5    | Tubulin beta-6 chain OS=Homo sapiens OX=9606 GN=TUE      | 154.8913316   |
| High       | Q13509    | Tubulin beta-3 chain OS=Homo sapiens OX=9606 GN=TUE      | 153.0394213   |
| High       | P49411    | Elongation factor Tu, mitochondrial OS=Homo sapiens OX   | 151.3928499   |
| High       | P50991    | T-complex protein 1 subunit delta OS=Homo sapiens OX=    | 149.2460367   |
| High       | P07814    | Bifunctional glutamate/proline--tRNA ligase OS=Homo sap  | 148.9980067   |
| High       | Q99832    | T-complex protein 1 subunit eta OS=Homo sapiens OX=96    | 147.6123637   |
| High       | Q14697    | Neutral alpha-glucosidase AB OS=Homo sapiens OX=9606     | 145.4945265   |
| High       | Q7KZF4    | Staphylococcal nuclease domain-containing protein 1 OS=  | 144.8763281   |
| High       | P54577    | Tyrosine--tRNA ligase, cytoplasmic OS=Homo sapiens OX=   | 142.7696105   |
| High       | P10809    | 60 kDa heat shock protein, mitochondrial OS=Homo sapie   | 141.8805499   |
| High       | P12268    | Inosine-5'-monophosphate dehydrogenase 2 OS=Homo s       | 138.7491148   |
| High       | P42704    | Leucine-rich PPR motif-containing protein, mitochondrial | 137.2241826   |
| High       | P08670    | Vimentin OS=Homo sapiens OX=9606 GN=VIM PE=1 SV=4        | 136.5418255   |
| High       | O14980    | Exportin-1 OS=Homo sapiens OX=9606 GN=XPO1 PE=1 SV       | 133.8085977   |

|      |        |                                                           |             |
|------|--------|-----------------------------------------------------------|-------------|
| High | P68032 | Actin, alpha cardiac muscle 1 OS=Homo sapiens OX=9606     | 133.1413166 |
| High | P35908 | Keratin, type II cytoskeletal 2 epidermal OS=Homo sapien  | 133.1074581 |
| High | P04843 | Dolichyl-diphosphooligosaccharide--protein glycosyltrans  | 132.0037783 |
| High | P11021 | Endoplasmic reticulum chaperone BiP OS=Homo sapiens (     | 129.5998109 |
| High | P49588 | Alanine--tRNA ligase, cytoplasmic OS=Homo sapiens OX=9    | 129.1934685 |
| High | P33991 | DNA replication licensing factor MCM4 OS=Homo sapiens     | 124.7991269 |
| High | P49915 | GMP synthase [glutamine-hydrolyzing] OS=Homo sapiens      | 124.3715131 |
| High | P26641 | Elongation factor 1-gamma OS=Homo sapiens OX=9606 G       | 123.7147003 |
| High | Q9P2J5 | Leucine--tRNA ligase, cytoplasmic OS=Homo sapiens OX=9    | 123.4467484 |
| High | O43175 | D-3-phosphoglycerate dehydrogenase OS=Homo sapiens        | 123.3730712 |
| High | P55060 | Exportin-2 OS=Homo sapiens OX=9606 GN=CSE1L PE=1 SV       | 123.3491061 |
| High | P50990 | T-complex protein 1 subunit theta OS=Homo sapiens OX=     | 121.5420081 |
| High | Q14974 | Importin subunit beta-1 OS=Homo sapiens OX=9606 GN=       | 121.1789885 |
| High | P13645 | Keratin, type I cytoskeletal 10 OS=Homo sapiens OX=9606   | 120.6110816 |
| High | P04264 | Keratin, type II cytoskeletal 1 OS=Homo sapiens OX=9606   | 119.8277401 |
| High | P09874 | Poly [ADP-ribose] polymerase 1 OS=Homo sapiens OX=96      | 119.6692137 |
| High | P25705 | ATP synthase subunit alpha, mitochondrial OS=Homo sap     | 118.7039218 |
| High | Q9Y285 | Phenylalanine--tRNA ligase alpha subunit OS=Homo sapie    | 112.7571585 |
| High | P55786 | Puromycin-sensitive aminopeptidase OS=Homo sapiens C      | 112.0514433 |
| High | Q86VP6 | Cullin-associated NEDD8-dissociated protein 1 OS=Homo     | 110.6082486 |
| High | P40227 | T-complex protein 1 subunit zeta OS=Homo sapiens OX=9     | 110.1091121 |
| High | Q9Y230 | RuvB-like 2 OS=Homo sapiens OX=9606 GN=RUVBL2 PE=1        | 109.0755475 |
| High | P14625 | Endoplasmic reticulum protein OS=Homo sapiens OX=9606     | 108.7935659 |
| High | P41252 | Isoleucine--tRNA ligase, cytoplasmic OS=Homo sapiens O    | 107.9071397 |
| High | P31943 | Heterogeneous nuclear ribonucleoprotein H OS=Homo sa      | 105.8031063 |
| High | P61978 | Heterogeneous nuclear ribonucleoprotein K OS=Homo sa      | 104.233338  |
| High | P63244 | Receptor of activated protein C kinase 1 OS=Homo sapier   | 104.1288065 |
| High | Q05639 | Elongation factor 1-alpha 2 OS=Homo sapiens OX=9606 G     | 102.8332692 |
| High | P22102 | Trifunctional purine biosynthetic protein adenosine-3 OS= | 98.32145708 |
| High | Q92616 | eIF-2-alpha kinase activator GCN1 OS=Homo sapiens OX=     | 98.03960226 |
| High | O75369 | Filamin-B OS=Homo sapiens OX=9606 GN=FLNB PE=1 SV=        | 97.31980488 |
| High | P05023 | Sodium/potassium-transporting ATPase subunit alpha-1 C    | 97.20500836 |
| High | P38646 | Stress-70 protein, mitochondrial OS=Homo sapiens OX=96    | 96.70802795 |
| High | Q15233 | Non-POU domain-containing octamer-binding protein OS=     | 93.35266147 |
| High | P41250 | Glycine--tRNA ligase OS=Homo sapiens OX=9606 GN=GAF       | 92.5494451  |
| High | P27824 | Calnexin OS=Homo sapiens OX=9606 GN=CANX PE=1 SV=         | 92.41209312 |
| High | P04844 | Dolichyl-diphosphooligosaccharide--protein glycosyltrans  | 92.18452019 |
| High | Q14566 | DNA replication licensing factor MCM6 OS=Homo sapiens     | 89.46326761 |
| High | Q13200 | 26S proteasome non-ATPase regulatory subunit 2 OS=Hoi     | 89.02398682 |
| High | Q00839 | Heterogeneous nuclear ribonucleoprotein U OS=Homo sa      | 88.8277254  |
| High | Q13263 | Transcription intermediary factor 1-beta OS=Homo sapier   | 88.71477769 |
| High | P08243 | Asparagine synthetase [glutamine-hydrolyzing] OS=Homo     | 87.39089151 |
| High | P52292 | Importin subunit alpha-1 OS=Homo sapiens OX=9606 GN=      | 86.12484577 |
| High | Q9NSE4 | Isoleucine--tRNA ligase, mitochondrial OS=Homo sapiens    | 85.71780827 |
| High | P49591 | Serine--tRNA ligase, cytoplasmic OS=Homo sapiens OX=96    | 85.57760487 |
| High | P12956 | X-ray repair cross-complementing protein 6 OS=Homo sap    | 85.04203864 |
| High | P35527 | Keratin, type I cytoskeletal 9 OS=Homo sapiens OX=9606    | 84.7625936  |
| High | P26599 | Polypyrimidine tract-binding protein 1 OS=Homo sapiens    | 84.40170133 |
| High | P52272 | Heterogeneous nuclear ribonucleoprotein M OS=Homo sa      | 83.28537909 |
| High | P17844 | Probable ATP-dependent RNA helicase DDX5 OS=Homo sa       | 82.81064067 |

|      |        |                                                                     |             |
|------|--------|---------------------------------------------------------------------|-------------|
| High | Q9Y265 | RuvB-like 1 OS=Homo sapiens OX=9606 GN=RUVBL1 PE=3                  | 82.62401677 |
| High | P26640 | Valine--tRNA ligase OS=Homo sapiens OX=9606 GN=VARSA                | 82.29933203 |
| High | P31939 | Bifunctional purine biosynthesis protein PURH OS=Homo               | 81.91623339 |
| High | P25205 | DNA replication licensing factor MCM3 OS=Homo sapiens               | 81.29425726 |
| High | P54652 | Heat shock-related 70 kDa protein 2 OS=Homo sapiens OX=9606         | 78.98834225 |
| High | P38919 | Eukaryotic initiation factor 4A-III OS=Homo sapiens OX=9606         | 78.92031072 |
| High | P52732 | Kinesin-like protein KIF11 OS=Homo sapiens OX=9606 GN=KIF11         | 78.17201404 |
| High | Q9Y4L1 | Hypoxia up-regulated protein 1 OS=Homo sapiens OX=9606 GN=HUP1      | 77.75607074 |
| High | P12277 | Creatine kinase B-type OS=Homo sapiens OX=9606 GN=CKB               | 76.59894605 |
| High | Q92841 | Probable ATP-dependent RNA helicase DDX17 OS=Homo sapiens           | 76.33774424 |
| High | P17066 | Heat shock 70 kDa protein 6 OS=Homo sapiens OX=9606 GN=HSP70        | 75.55327339 |
| High | Q9NVI7 | ATPase family AAA domain-containing protein 3A OS=Homo sapiens      | 73.04865482 |
| High | Q9UJZ1 | Stomatin-like protein 2, mitochondrial OS=Homo sapiens              | 72.55358767 |
| High | P22695 | Cytochrome b-c1 complex subunit 2, mitochondrial OS=Homo sapiens    | 71.33153527 |
| High | P07195 | L-lactate dehydrogenase B chain OS=Homo sapiens OX=9606 GN=LDB      | 70.59833237 |
| High | Q08J23 | tRNA (cytosine(34)-C(5))-methyltransferase OS=Homo sapiens          | 70.45592044 |
| High | Q14166 | Tubulin--tyrosine ligase-like protein 12 OS=Homo sapiens            | 69.63505412 |
| High | P53618 | Coatomer subunit beta OS=Homo sapiens OX=9606 GN=COAT               | 69.16512249 |
| High | P16615 | Sarcoplasmic/endoplasmic reticulum calcium ATPase 2 OS=Homo sapiens | 68.45749734 |
| High | O00571 | ATP-dependent RNA helicase DDX3X OS=Homo sapiens OX=9606            | 68.40378682 |
| High | P54136 | Arginine--tRNA ligase, cytoplasmic OS=Homo sapiens OX=9606          | 68.39224845 |
| High | P38159 | RNA-binding motif protein, X chromosome OS=Homo sapiens             | 68.00515121 |
| High | O00410 | Importin-5 OS=Homo sapiens OX=9606 GN=IPO5 PE=1 SV=1                | 67.75145131 |
| High | Q16891 | MICOS complex subunit MIC60 OS=Homo sapiens OX=9606 GN=MIC60        | 67.33006446 |
| High | P47897 | Glutamine--tRNA ligase OS=Homo sapiens OX=9606 GN=GLUL              | 66.59142774 |
| High | P08865 | 40S ribosomal protein SA OS=Homo sapiens OX=9606 GN=SA              | 66.14660866 |
| High | O94826 | Mitochondrial import receptor subunit TOM70 OS=Homo sapiens         | 65.64726756 |
| High | O95373 | Importin-7 OS=Homo sapiens OX=9606 GN=IPO7 PE=1 SV=1                | 63.90494811 |
| High | P00338 | L-lactate dehydrogenase A chain OS=Homo sapiens OX=9606 GN=LDBA     | 62.91043854 |
| High | P19338 | Nucleolin OS=Homo sapiens OX=9606 GN=NCL PE=1 SV=3                  | 62.57228036 |
| High | Q14240 | Eukaryotic initiation factor 4A-II OS=Homo sapiens OX=9606          | 62.21649834 |
| High | P13804 | Electron transfer flavoprotein subunit alpha, mitochondrial         | 61.94501642 |
| High | P49736 | DNA replication licensing factor MCM2 OS=Homo sapiens               | 61.42171144 |
| High | P31930 | Cytochrome b-c1 complex subunit 1, mitochondrial OS=Homo sapiens    | 61.01865898 |
| High | Q99623 | Prohibitin-2 OS=Homo sapiens OX=9606 GN=PHB2 PE=1 SV=1              | 60.90752706 |
| High | P54886 | Delta-1-pyrroline-5-carboxylate synthase OS=Homo sapiens            | 60.42906479 |
| High | P14866 | Heterogeneous nuclear ribonucleoprotein L OS=Homo sapiens           | 60.3052613  |
| High | P14868 | Aspartate--tRNA ligase, cytoplasmic OS=Homo sapiens OX=9606         | 60.2823389  |
| High | P30153 | Serine/threonine-protein phosphatase 2A 65 kDa regulatory           | 60.17444646 |
| High | P13797 | Plastin-3 OS=Homo sapiens OX=9606 GN=PLS3 PE=1 SV=4                 | 59.60262806 |
| High | Q13620 | Cullin-4B OS=Homo sapiens OX=9606 GN=CUL4B PE=1 SV=1                | 59.37510344 |
| High | Q92945 | Far upstream element-binding protein 2 OS=Homo sapiens              | 59.21399502 |
| High | P39656 | Dolichyl-diphosphooligosaccharide--protein glycosyltransferase      | 59.01812345 |
| High | Q9NSD9 | Phenylalanine--tRNA ligase beta subunit OS=Homo sapiens             | 58.8092139  |
| High | Q9NZI8 | Insulin-like growth factor 2 mRNA-binding protein 1 OS=Homo sapiens | 58.78245312 |
| High | P40939 | Trifunctional enzyme subunit alpha, mitochondrial OS=Homo sapiens   | 58.4644828  |
| High | P24752 | Acetyl-CoA acetyltransferase, mitochondrial OS=Homo sapiens         | 58.37002152 |
| High | Q9UNF1 | Melanoma-associated antigen D2 OS=Homo sapiens OX=9606              | 57.41552487 |
| High | P62826 | GTP-binding nuclear protein Ran OS=Homo sapiens OX=9606 GN=RAN      | 56.90556995 |
| High | Q02878 | 60S ribosomal protein L6 OS=Homo sapiens OX=9606 GN=L6              | 56.63568751 |

|      |        |                                                          |             |
|------|--------|----------------------------------------------------------|-------------|
| High | P36578 | 60S ribosomal protein L4 OS=Homo sapiens OX=9606 GN=     | 56.57667269 |
| High | Q96QK1 | Vacuolar protein sorting-associated protein 35 OS=Homo   | 56.06260118 |
| High | Q16576 | Histone-binding protein RBBP7 OS=Homo sapiens OX=960     | 55.16732218 |
| High | Q15366 | Poly(rC)-binding protein 2 OS=Homo sapiens OX=9606 GN=   | 55.10433639 |
| High | P23921 | Ribonucleoside-diphosphate reductase large subunit OS=H  | 54.97966893 |
| High | Q4VCS5 | Angiotenin OS=Homo sapiens OX=9606 GN=AMOT PE=1          | 54.48024738 |
| High | P20700 | Lamin-B1 OS=Homo sapiens OX=9606 GN=LMNB1 PE=1 S         | 54.4533025  |
| High | Q8WVM8 | Sec1 family domain-containing protein 1 OS=Homo sapier   | 53.81246074 |
| High | P34897 | Serine hydroxymethyltransferase, mitochondrial OS=Hom    | 53.56434739 |
| High | P55795 | Heterogeneous nuclear ribonucleoprotein H2 OS=Homo s     | 52.09082075 |
| High | Q99615 | DnaJ homolog subfamily C member 7 OS=Homo sapiens C      | 51.87100993 |
| High | Q06203 | Amidophosphoribosyltransferase OS=Homo sapiens OX=9      | 51.37478044 |
| High | Q8IXI1 | Mitochondrial Rho GTPase 2 OS=Homo sapiens OX=9606       | 51.36771952 |
| High | Q562R1 | Beta-actin-like protein 2 OS=Homo sapiens OX=9606 GN=    | 51.34139249 |
| High | P78344 | Eukaryotic translation initiation factor 4 gamma 2 OS=Ho | 51.04826056 |
| High | Q96I24 | Far upstream element-binding protein 3 OS=Homo sapier    | 51.04353766 |
| High | P22626 | Heterogeneous nuclear ribonucleoproteins A2/B1 OS=Ho     | 50.69736032 |
| High | Q08211 | ATP-dependent RNA helicase A OS=Homo sapiens OX=960      | 50.65881767 |
| High | O43776 | Asparagine--tRNA ligase, cytoplasmic OS=Homo sapiens C   | 50.58286761 |
| High | P13861 | cAMP-dependent protein kinase type II-alpha regulatory s | 50.05139185 |
| High | P17980 | 26S proteasome regulatory subunit 6A OS=Homo sapiens     | 49.9102155  |
| High | P56192 | Methionine--tRNA ligase, cytoplasmic OS=Homo sapiens C   | 48.90995126 |
| High | Q92499 | ATP-dependent RNA helicase DDX1 OS=Homo sapiens OX       | 48.54397178 |
| High | P52597 | Heterogeneous nuclear ribonucleoprotein F OS=Homo sa     | 48.41785877 |
| High | P11310 | Medium-chain specific acyl-CoA dehydrogenase, mitoch     | 47.91789253 |
| High | Q14008 | Cytoskeleton-associated protein 5 OS=Homo sapiens OX=    | 47.80825055 |
| High | P04181 | Ornithine aminotransferase, mitochondrial OS=Homo sap    | 47.71075803 |
| High | P62081 | 40S ribosomal protein S7 OS=Homo sapiens OX=9606 GN=     | 47.69362829 |
| High | P11908 | Ribose-phosphate pyrophosphokinase 2 OS=Homo sapier      | 47.56491829 |
| High | Q9Y3I0 | tRNA-splicing ligase RtcB homolog OS=Homo sapiens OX=    | 47.54957628 |
| High | P17812 | CTP synthase 1 OS=Homo sapiens OX=9606 GN=CTPS1 PE       | 47.26926603 |
| High | P62820 | Ras-related protein Rab-1A OS=Homo sapiens OX=9606 G     | 47.26323876 |
| High | O60749 | Sorting nexin-2 OS=Homo sapiens OX=9606 GN=SNX2 PE=      | 47.17461458 |
| High | Q13148 | TAR DNA-binding protein 43 OS=Homo sapiens OX=9606       | 47.16723534 |
| High | Q13838 | Spliceosome RNA helicase DDX39B OS=Homo sapiens OX=      | 46.91757072 |
| High | P61221 | ATP-binding cassette sub-family E member 1 OS=Homo sa    | 46.74669227 |
| High | P43246 | DNA mismatch repair protein Msh2 OS=Homo sapiens OX      | 46.68961812 |
| High | P00558 | Phosphoglycerate kinase 1 OS=Homo sapiens OX=9606 G      | 46.51783985 |
| High | Q15365 | Poly(rC)-binding protein 1 OS=Homo sapiens OX=9606 GN=   | 46.44290707 |
| High | Q14254 | Flotillin-2 OS=Homo sapiens OX=9606 GN=FLOT2 PE=1 SV     | 46.37608562 |
| High | Q16643 | Drebrin OS=Homo sapiens OX=9606 GN=DBN1 PE=1 SV=4        | 46.30627148 |
| High | P42167 | Lamina-associated polypeptide 2, isoforms beta/gamma C   | 45.98244377 |
| High | O75534 | Cold shock domain-containing protein E1 OS=Homo sapie    | 45.84624316 |
| High | P48735 | Isocitrate dehydrogenase [NADP], mitochondrial OS=Hom    | 45.7879505  |
| High | Q04637 | Eukaryotic translation initiation factor 4 gamma 1 OS=Ho | 45.69115894 |
| High | O15067 | Phosphoribosylformylglycinamide synthase OS=Homo s       | 45.3658176  |
| High | Q969V3 | Nicalin OS=Homo sapiens OX=9606 GN=NCLN PE=1 SV=2        | 45.18636692 |
| High | P26639 | Threonine--tRNA ligase, cytoplasmic OS=Homo sapiens O    | 45.11873883 |
| High | P51991 | Heterogeneous nuclear ribonucleoprotein A3 OS=Homo s     | 45.06364285 |
| High | Q15181 | Inorganic pyrophosphatase OS=Homo sapiens OX=9606 G      | 45.03752352 |

|      |        |                                                             |             |
|------|--------|-------------------------------------------------------------|-------------|
| High | P61204 | ADP-ribosylation factor 3 OS=Homo sapiens OX=9606 GN=       | 45.00480748 |
| High | O75874 | Isocitrate dehydrogenase [NADP] cytoplasmic OS=Homo s       | 44.95287682 |
| High | P09651 | Heterogeneous nuclear ribonucleoprotein A1 OS=Homo s        | 44.93371352 |
| High | Q9UG63 | ATP-binding cassette sub-family F member 2 OS=Homo sa       | 44.39844348 |
| High | P27797 | Calreticulin OS=Homo sapiens OX=9606 GN=CALR PE=1 SV        | 44.24568676 |
| High | P28331 | NADH-ubiquinone oxidoreductase 75 kDa subunit, mitoch       | 44.19069666 |
| High | P16402 | Histone H1.3 OS=Homo sapiens OX=9606 GN=HIST1H1D f          | 43.89763325 |
| High | P51812 | Ribosomal protein S6 kinase alpha-3 OS=Homo sapiens O       | 43.82595701 |
| High | Q9Y262 | Eukaryotic translation initiation factor 3 subunit L OS=Hor | 43.64232852 |
| High | P10768 | S-formylglutathione hydrolase OS=Homo sapiens OX=960        | 43.16838122 |
| High | P30837 | Aldehyde dehydrogenase X, mitochondrial OS=Homo sapi        | 43.03968472 |
| High | Q96CS3 | FAS-associated factor 2 OS=Homo sapiens OX=9606 GN=F        | 42.91287449 |
| High | Q02750 | Dual specificity mitogen-activated protein kinase kinase 1  | 42.84759208 |
| High | P33992 | DNA replication licensing factor MCM5 OS=Homo sapiens       | 42.47898916 |
| High | Q15813 | Tubulin-specific chaperone E OS=Homo sapiens OX=9606        | 42.33637836 |
| High | Q02790 | Peptidyl-prolyl cis-trans isomerase FKBP4 OS=Homo sapie     | 42.22164913 |
| High | O00429 | Dynamin-1-like protein OS=Homo sapiens OX=9606 GN=D         | 42.14854523 |
| High | P42166 | Lamina-associated polypeptide 2, isoform alpha OS=Homo      | 42.14721484 |
| High | Q9H9B4 | Sideroflexin-1 OS=Homo sapiens OX=9606 GN=SFXN1 PE=         | 42.07719786 |
| High | Q15645 | Pachytene checkpoint protein 2 homolog OS=Homo sapie        | 42.05768829 |
| High | Q9Y2L1 | Exosome complex exonuclease RRP44 OS=Homo sapiens           | 41.92542664 |
| High | O95831 | Apoptosis-inducing factor 1, mitochondrial OS=Homo sap      | 41.86836496 |
| High | O43242 | 26S proteasome non-ATPase regulatory subunit 3 OS=Hor       | 41.63273902 |
| High | P60891 | Ribose-phosphate pyrophosphokinase 1 OS=Homo sapier         | 41.39530505 |
| High | Q8WUM4 | Programmed cell death 6-interacting protein OS=Homo sa      | 41.1627557  |
| High | O14744 | Protein arginine N-methyltransferase 5 OS=Homo sapiens      | 41.15468721 |
| High | P36507 | Dual specificity mitogen-activated protein kinase kinase 2  | 41.13099011 |
| High | P23246 | Splicing factor, proline- and glutamine-rich OS=Homo sapi   | 40.19693041 |
| High | Q99460 | 26S proteasome non-ATPase regulatory subunit 1 OS=Hor       | 40.12929618 |
| High | Q5T9A4 | ATPase family AAA domain-containing protein 3B OS=Hor       | 39.80380312 |
| High | Q9UBB4 | Ataxin-10 OS=Homo sapiens OX=9606 GN=ATXN10 PE=1 S          | 39.60177237 |
| High | P05141 | ADP/ATP translocase 2 OS=Homo sapiens OX=9606 GN=S          | 39.52032527 |
| High | P23396 | 40S ribosomal protein S3 OS=Homo sapiens OX=9606 GN:        | 39.25759755 |
| High | O60763 | General vesicular transport factor p115 OS=Homo sapiens     | 39.12233997 |
| High | P05787 | Keratin, type II cytoskeletal 8 OS=Homo sapiens OX=9606     | 38.99143009 |
| High | O60701 | UDP-glucose 6-dehydrogenase OS=Homo sapiens OX=960          | 38.88307422 |
| High | O95202 | Mitochondrial proton/calcium exchanger protein OS=Hon       | 38.83147677 |
| High | Q6PI48 | Aspartate--tRNA ligase, mitochondrial OS=Homo sapiens (     | 38.66238093 |
| High | P11413 | Glucose-6-phosphate 1-dehydrogenase OS=Homo sapiens         | 38.55182497 |
| High | Q8N0X7 | Spartin OS=Homo sapiens OX=9606 GN=SPART PE=1 SV=1          | 38.47420926 |
| High | P50570 | Dynamin-2 OS=Homo sapiens OX=9606 GN=DNM2 PE=1 S            | 38.22828779 |
| High | P19623 | Spermidine synthase OS=Homo sapiens OX=9606 GN=SRM          | 38.08018606 |
| High | Q86Y56 | Dynein assembly factor 5, axonemal OS=Homo sapiens O        | 37.76060173 |
| High | P06493 | Cyclin-dependent kinase 1 OS=Homo sapiens OX=9606 GN        | 37.57907353 |
| High | P46060 | Ran GTPase-activating protein 1 OS=Homo sapiens OX=96       | 37.24149839 |
| High | O75131 | Copine-3 OS=Homo sapiens OX=9606 GN=CPNE3 PE=1 SV           | 37.11783888 |
| High | P55265 | Double-stranded RNA-specific adenosine deaminase OS=f       | 37.10931035 |
| High | P12004 | Proliferating cell nuclear antigen OS=Homo sapiens OX=9     | 36.97474962 |
| High | P55072 | Transitional endoplasmic reticulum ATPase OS=Homo sap       | 36.93491073 |
| High | P36871 | Phosphoglucomutase-1 OS=Homo sapiens OX=9606 GN=f           | 36.87198809 |

|      |        |                                                             |             |
|------|--------|-------------------------------------------------------------|-------------|
| High | Q9UJS0 | Calcium-binding mitochondrial carrier protein Aralar2 OS=   | 36.84405685 |
| High | Q8N1F7 | Nuclear pore complex protein Nup93 OS=Homo sapiens C        | 36.66195807 |
| High | P62195 | 26S proteasome regulatory subunit 8 OS=Homo sapiens C       | 36.58469168 |
| High | P51149 | Ras-related protein Rab-7a OS=Homo sapiens OX=9606 G        | 36.51310702 |
| High | P35613 | Basigin OS=Homo sapiens OX=9606 GN=BSG PE=1 SV=2            | 36.40922434 |
| High | P43686 | 26S proteasome regulatory subunit 6B OS=Homo sapiens        | 36.36559455 |
| High | O75694 | Nuclear pore complex protein Nup155 OS=Homo sapiens         | 36.1596629  |
| High | P08195 | 4F2 cell-surface antigen heavy chain OS=Homo sapiens O      | 36.14252125 |
| High | P39748 | Flap endonuclease 1 OS=Homo sapiens OX=9606 GN=FEN          | 36.08617493 |
| High | P33176 | Kinesin-1 heavy chain OS=Homo sapiens OX=9606 GN=KIF        | 36.01807748 |
| High | Q9H3P7 | Golgi resident protein GCP60 OS=Homo sapiens OX=9606        | 35.80444927 |
| High | Q53H12 | Acylglycerol kinase, mitochondrial OS=Homo sapiens OX=      | 35.58453112 |
| High | Q6P2Q9 | Pre-mRNA-processing-splicing factor 8 OS=Homo sapiens       | 35.46767021 |
| High | P62714 | Serine/threonine-protein phosphatase 2A catalytic subun     | 35.40792154 |
| High | Q9H0U4 | Ras-related protein Rab-1B OS=Homo sapiens OX=9606 G        | 35.40121726 |
| High | P32969 | 60S ribosomal protein L9 OS=Homo sapiens OX=9606 GN:        | 35.37346737 |
| High | Q06210 | Glutamine--fructose-6-phosphate aminotransferase [isom      | 35.32816788 |
| High | Q9UMS4 | Pre-mRNA-processing factor 19 OS=Homo sapiens OX=96         | 35.32318757 |
| High | Q58FG0 | Putative heat shock protein HSP 90-alpha A5 OS=Homo sa      | 35.1984227  |
| High | P49419 | Alpha-aminoadipic semialdehyde dehydrogenase OS=Hor         | 35.00700066 |
| High | P18085 | ADP-ribosylation factor 4 OS=Homo sapiens OX=9606 GN        | 34.68608733 |
| High | Q5JTZ9 | Alanine--tRNA ligase, mitochondrial OS=Homo sapiens OX      | 34.68001211 |
| High | P05388 | 60S acidic ribosomal protein P0 OS=Homo sapiens OX=96       | 34.58743485 |
| High | P62701 | 40S ribosomal protein S4, X isoform OS=Homo sapiens O       | 34.06610777 |
| High | P53621 | Coatomer subunit alpha OS=Homo sapiens OX=9606 GN=          | 33.9281775  |
| High | P60228 | Eukaryotic translation initiation factor 3 subunit E OS=Hor | 33.88967511 |
| High | O43252 | Bifunctional 3'-phosphoadenosine 5'-phosphosulfate synt     | 33.86395334 |
| High | Q9Y3F4 | Serine-threonine kinase receptor-associated protein OS=f    | 33.74504477 |
| High | P31948 | Stress-induced-phosphoprotein 1 OS=Homo sapiens OX=9        | 33.32430037 |
| High | O76094 | Signal recognition particle subunit SRP72 OS=Homo sapie     | 33.27381016 |
| High | Q02809 | Procollagen-lysine,2-oxoglutarate 5-dioxygenase 1 OS=Hc     | 33.2648679  |
| High | O43143 | Pre-mRNA-splicing factor ATP-dependent RNA helicase Df      | 33.2581351  |
| High | Q01813 | ATP-dependent 6-phosphofructokinase, platelet type OS=      | 33.20170911 |
| High | P08559 | Pyruvate dehydrogenase E1 component subunit alpha, so       | 33.19092973 |
| High | P30419 | Glycylpeptide N-tetradecanoyltransferase 1 OS=Homo sa       | 33.15414022 |
| High | P55084 | Trifunctional enzyme subunit beta, mitochondrial OS=Hor     | 32.90953272 |
| High | Q92973 | Transportin-1 OS=Homo sapiens OX=9606 GN=TNPO1 PE-          | 32.39302239 |
| High | P46940 | Ras GTPase-activating-like protein IQGAP1 OS=Homo sapi      | 32.31963952 |
| High | Q15029 | 116 kDa U5 small nuclear ribonucleoprotein component C      | 32.25140269 |
| High | A6NHL2 | Tubulin alpha chain-like 3 OS=Homo sapiens OX=9606 GN       | 31.98036211 |
| High | P61106 | Ras-related protein Rab-14 OS=Homo sapiens OX=9606 G        | 31.96225561 |
| High | P62191 | 26S proteasome regulatory subunit 4 OS=Homo sapiens C       | 31.89903567 |
| High | P07237 | Protein disulfide-isomerase OS=Homo sapiens OX=9606 C       | 31.76670003 |
| High | Q9UHB9 | Signal recognition particle subunit SRP68 OS=Homo sapie     | 31.72720885 |
| High | Q13451 | Peptidyl-prolyl cis-trans isomerase FKBP5 OS=Homo sapie     | 31.63079125 |
| High | P46782 | 40S ribosomal protein S5 OS=Homo sapiens OX=9606 GN:        | 30.99513183 |
| High | Q96GX5 | Serine/threonine-protein kinase greatwall OS=Homo sapi      | 30.99174867 |
| High | Q06830 | Peroxiredoxin-1 OS=Homo sapiens OX=9606 GN=PRDX1 F          | 30.87527755 |
| High | O14929 | Histone acetyltransferase type B catalytic subunit OS=Hor   | 30.85168131 |
| High | O00148 | ATP-dependent RNA helicase DDX39A OS=Homo sapiens C         | 30.83268048 |

|      |        |                                                          |             |
|------|--------|----------------------------------------------------------|-------------|
| High | O75955 | Flotillin-1 OS=Homo sapiens OX=9606 GN=FLOT1 PE=1 SV     | 30.80499455 |
| High | O95433 | Activator of 90 kDa heat shock protein ATPase homolog 1  | 30.75338689 |
| High | P11177 | Pyruvate dehydrogenase E1 component subunit beta, mit    | 30.66535144 |
| High | Q96FW1 | Ubiquitin thioesterase OTUB1 OS=Homo sapiens OX=9606     | 30.49698583 |
| High | P45974 | Ubiquitin carboxyl-terminal hydrolase 5 OS=Homo sapien   | 30.42865178 |
| High | P29401 | Transketolase OS=Homo sapiens OX=9606 GN=TKT PE=1 S      | 30.34059202 |
| High | P46459 | Vesicle-fusing ATPase OS=Homo sapiens OX=9606 GN=NS      | 30.33516134 |
| High | P15880 | 40S ribosomal protein S2 OS=Homo sapiens OX=9606 GN:     | 30.28211008 |
| High | Q99829 | Copine-1 OS=Homo sapiens OX=9606 GN=CPNE1 PE=1 SV        | 30.14828017 |
| High | O76031 | ATP-dependent Clp protease ATP-binding subunit clpX-like | 30.09488695 |
| High | Q8NC51 | Plasminogen activator inhibitor 1 RNA-binding protein OS | 30.09470576 |
| High | P11940 | Polyadenylate-binding protein 1 OS=Homo sapiens OX=96    | 29.88408498 |
| High | O75306 | NADH dehydrogenase [ubiquinone] iron-sulfur protein 2,   | 29.47838848 |
| High | O75643 | U5 small nuclear ribonucleoprotein 200 kDa helicase OS=  | 29.47230733 |
| High | Q96T76 | MMS19 nucleotide excision repair protein homolog OS=H    | 29.46979068 |
| High | Q12905 | Interleukin enhancer-binding factor 2 OS=Homo sapiens C  | 29.32758889 |
| High | Q6UB35 | Monofunctional C1-tetrahydrofolate synthase, mitochond   | 29.22912693 |
| High | P62424 | 60S ribosomal protein L7a OS=Homo sapiens OX=9606 GN     | 29.21944561 |
| High | P61011 | Signal recognition particle 54 kDa protein OS=Homo sapie | 29.17561174 |
| High | Q96PK6 | RNA-binding protein 14 OS=Homo sapiens OX=9606 GN=F      | 29.12894105 |
| High | P31040 | Succinate dehydrogenase [ubiquinone] flavoprotein subu   | 28.85813769 |
| High | P51659 | Peroxisomal multifunctional enzyme type 2 OS=Homo sap    | 28.60617468 |
| High | Q9UNM6 | 26S proteasome non-ATPase regulatory subunit 13 OS=Ho    | 28.55818391 |
| High | P31689 | DnaJ homolog subfamily A member 1 OS=Homo sapiens C      | 28.42204295 |
| High | P42765 | 3-ketoacyl-CoA thiolase, mitochondrial OS=Homo sapiens   | 28.3747606  |
| High | Q9UQE7 | Structural maintenance of chromosomes protein 3 OS=Ho    | 28.23744727 |
| High | Q14C86 | GTPase-activating protein and VPS9 domain-containing pr  | 28.18448177 |
| High | Q15418 | Ribosomal protein S6 kinase alpha-1 OS=Homo sapiens O    | 28.10520195 |
| High | P39023 | 60S ribosomal protein L3 OS=Homo sapiens OX=9606 GN:     | 28.04813996 |
| High | O95394 | Phosphoacetylglucosamine mutase OS=Homo sapiens OX       | 28.00422918 |
| High | P26368 | Splicing factor U2AF 65 kDa subunit OS=Homo sapiens OX   | 27.96052532 |
| High | Q12931 | Heat shock protein 75 kDa, mitochondrial OS=Homo sapie   | 27.74815717 |
| High | O96008 | Mitochondrial import receptor subunit TOM40 homolog (    | 27.6022116  |
| High | P18621 | 60S ribosomal protein L17 OS=Homo sapiens OX=9606 GN     | 27.59788916 |
| High | P35606 | Coatomer subunit beta' OS=Homo sapiens OX=9606 GN=(      | 27.54891651 |
| High | O60716 | Catenin delta-1 OS=Homo sapiens OX=9606 GN=CTNND1        | 27.52458612 |
| High | P30876 | DNA-directed RNA polymerase II subunit RPB2 OS=Homo      | 27.29284765 |
| High | P62136 | Serine/threonine-protein phosphatase PP1-alpha catalytic | 27.25940808 |
| High | O94832 | Unconventional myosin-IId OS=Homo sapiens OX=9606 GN     | 27.21401364 |
| High | Q9Y3Z3 | Deoxynucleoside triphosphate triphosphohydrolase SAMI    | 27.21273689 |
| High | P10155 | 60 kDa SS-A/Ro ribonucleoprotein OS=Homo sapiens OX=     | 27.01988828 |
| High | Q13547 | Histone deacetylase 1 OS=Homo sapiens OX=9606 GN=HD      | 27.01731446 |
| High | Q15021 | Condensin complex subunit 1 OS=Homo sapiens OX=9606      | 26.94092658 |
| High | P63151 | Serine/threonine-protein phosphatase 2A 55 kDa regulato  | 26.93223137 |
| High | A5YKK6 | CCR4-NOT transcription complex subunit 1 OS=Homo sap     | 26.87085683 |
| High | P06748 | Nucleophosmin OS=Homo sapiens OX=9606 GN=NPM1 PI         | 26.75964807 |
| High | P61163 | Alpha-centractin OS=Homo sapiens OX=9606 GN=ACTR1A       | 26.71265519 |
| High | P61026 | Ras-related protein Rab-10 OS=Homo sapiens OX=9606 G     | 26.70949252 |
| High | P27694 | Replication protein A 70 kDa DNA-binding subunit OS=Ho   | 26.70234722 |
| High | Q9Y450 | HBS1-like protein OS=Homo sapiens OX=9606 GN=HBS1L       | 26.65206441 |

|      |        |                                                           |             |
|------|--------|-----------------------------------------------------------|-------------|
| High | P09914 | Interferon-induced protein with tetratricopeptide repeats | 26.50923811 |
| High | O43390 | Heterogeneous nuclear ribonucleoprotein R OS=Homo sa      | 26.36859967 |
| High | Q15046 | Lysine--tRNA ligase OS=Homo sapiens OX=9606 GN=KARS       | 26.24703503 |
| High | Q99536 | Synaptic vesicle membrane protein VAT-1 homolog OS=H      | 26.20669612 |
| High | Q99504 | Eyes absent homolog 3 OS=Homo sapiens OX=9606 GN=E        | 25.9546134  |
| High | P45880 | Voltage-dependent anion-selective channel protein 2 OS=   | 25.84049202 |
| High | Q9UBF2 | Coatomer subunit gamma-2 OS=Homo sapiens OX=9606 G        | 25.74921557 |
| High | O43592 | Exportin-T OS=Homo sapiens OX=9606 GN=XPOT PE=1 SV        | 25.69361663 |
| High | P18124 | 60S ribosomal protein L7 OS=Homo sapiens OX=9606 GN:      | 25.44036176 |
| High | P08133 | Annexin A6 OS=Homo sapiens OX=9606 GN=ANXA6 PE=1          | 25.42772765 |
| High | P51148 | Ras-related protein Rab-5C OS=Homo sapiens OX=9606 G      | 25.32321982 |
| High | P54578 | Ubiquitin carboxyl-terminal hydrolase 14 OS=Homo sapie    | 25.31554748 |
| High | Q6P1J9 | Parafibromin OS=Homo sapiens OX=9606 GN=CDC73 PE=         | 25.26272572 |
| High | P49755 | Transmembrane emp24 domain-containing protein 10 OS       | 25.22708616 |
| High | O75533 | Splicing factor 3B subunit 1 OS=Homo sapiens OX=9606 G    | 25.21584382 |
| High | P09622 | Dihydrolipoyl dehydrogenase, mitochondrial OS=Homo sa     | 25.156965   |
| High | Q92597 | Protein NDRG1 OS=Homo sapiens OX=9606 GN=NDRG1 P          | 25.10037116 |
| High | Q16658 | Fascin OS=Homo sapiens OX=9606 GN=FSCN1 PE=1 SV=3         | 25.06019354 |
| High | O00116 | Alkyldihydroxyacetonephosphate synthase, peroxisomal C    | 24.92692196 |
| High | P43243 | Matrin-3 OS=Homo sapiens OX=9606 GN=MATR3 PE=1 SV         | 24.73934218 |
| High | Q9BW92 | Threonine--tRNA ligase, mitochondrial OS=Homo sapiens     | 24.61634151 |
| High | Q9NUU7 | ATP-dependent RNA helicase DDX19A OS=Homo sapiens C       | 24.50307588 |
| High | Q9BTV4 | Transmembrane protein 43 OS=Homo sapiens OX=9606 G        | 24.35334923 |
| High | P0DN79 | Cystathionine beta-synthase-like protein OS=Homo sapie    | 24.30851587 |
| High | O43615 | Mitochondrial import inner membrane translocase subun     | 24.17992303 |
| High | P23258 | Tubulin gamma-1 chain OS=Homo sapiens OX=9606 GN=T        | 23.92849845 |
| High | P63104 | 14-3-3 protein zeta/delta OS=Homo sapiens OX=9606 GN      | 23.89268005 |
| High | P35998 | 26S proteasome regulatory subunit 7 OS=Homo sapiens C     | 23.87517054 |
| High | P61158 | Actin-related protein 3 OS=Homo sapiens OX=9606 GN=A      | 23.84586554 |
| High | Q8NE71 | ATP-binding cassette sub-family F member 1 OS=Homo sa     | 23.8453777  |
| High | Q15758 | Neutral amino acid transporter B(0) OS=Homo sapiens OX    | 23.70634734 |
| High | Q9BQ52 | Zinc phosphodiesterase ELAC protein 2 OS=Homo sapiens     | 23.45364051 |
| High | O75083 | WD repeat-containing protein 1 OS=Homo sapiens OX=96      | 23.32540982 |
| High | P06280 | Alpha-galactosidase A OS=Homo sapiens OX=9606 GN=GL       | 23.30300983 |
| High | Q9H993 | Protein-glutamate O-methyltransferase OS=Homo sapien      | 23.04752541 |
| High | Q9Y6G9 | Cytoplasmic dynein 1 light intermediate chain 1 OS=Homo   | 22.97762316 |
| High | P20839 | Inosine-5'-monophosphate dehydrogenase 1 OS=Homo sa       | 22.96523965 |
| High | P15170 | Eukaryotic peptide chain release factor GTP-binding subu  | 22.93175016 |
| High | P49643 | DNA primase large subunit OS=Homo sapiens OX=9606 G       | 22.79550185 |
| High | P18754 | Regulator of chromosome condensation OS=Homo sapier       | 22.79221162 |
| High | P02768 | Serum albumin OS=Homo sapiens OX=9606 GN=ALB PE=1         | 22.7654008  |
| High | P62333 | 26S proteasome regulatory subunit 10B OS=Homo sapien      | 22.75852058 |
| High | P52701 | DNA mismatch repair protein Msh6 OS=Homo sapiens OX       | 22.74035223 |
| High | Q9UQ16 | Dynamin-3 OS=Homo sapiens OX=9606 GN=DNM3 PE=1 S          | 22.64189577 |
| High | Q00325 | Phosphate carrier protein, mitochondrial OS=Homo sapie    | 22.48181309 |
| High | O14828 | Secretory carrier-associated membrane protein 3 OS=Hor    | 22.38725643 |
| High | Q9UIA9 | Exportin-7 OS=Homo sapiens OX=9606 GN=XPO7 PE=1 SV        | 22.3866624  |
| High | Q96P70 | Importin-9 OS=Homo sapiens OX=9606 GN=IPO9 PE=1 SV        | 22.30634321 |
| High | P78347 | General transcription factor II-I OS=Homo sapiens OX=96   | 22.25962971 |
| High | Q9NQW7 | Xaa-Pro aminopeptidase 1 OS=Homo sapiens OX=9606 GI       | 22.16614243 |

|      |        |                                                            |             |
|------|--------|------------------------------------------------------------|-------------|
| High | Q02978 | Mitochondrial 2-oxoglutarate/malate carrier protein OS=H   | 22.05390675 |
| High | P28340 | DNA polymerase delta catalytic subunit OS=Homo sapiens     | 21.99166064 |
| High | Q8TAT6 | Nuclear protein localization protein 4 homolog OS=Homo     | 21.93525079 |
| High | Q9Y678 | Coatomer subunit gamma-1 OS=Homo sapiens OX=9606 GN=       | 21.92276875 |
| High | P49189 | 4-trimethylaminobutyraldehyde dehydrogenase OS=Homo        | 21.9090708  |
| High | Q53EL6 | Programmed cell death protein 4 OS=Homo sapiens OX=9       | 21.84826646 |
| High | Q93009 | Ubiquitin carboxyl-terminal hydrolase 7 OS=Homo sapien     | 21.54790823 |
| High | P27635 | 60S ribosomal protein L10 OS=Homo sapiens OX=9606 GN=      | 21.51263412 |
| High | Q9H4M9 | EH domain-containing protein 1 OS=Homo sapiens OX=96       | 21.51128697 |
| High | O95671 | N-acetylserotonin O-methyltransferase-like protein OS=H    | 21.43832184 |
| High | P62140 | Serine/threonine-protein phosphatase PP1-beta catalytic    | 21.37455376 |
| High | Q96920 | FAST kinase domain-containing protein 4 OS=Homo sapie      | 21.36313621 |
| High | Q09028 | Histone-binding protein RBBP4 OS=Homo sapiens OX=960       | 21.2826302  |
| High | O94874 | E3 UFM1-protein ligase 1 OS=Homo sapiens OX=9606 GN=       | 21.24099348 |
| High | O00303 | Eukaryotic translation initiation factor 3 subunit F OS=Ho | 21.14677071 |
| High | Q14694 | Ubiquitin carboxyl-terminal hydrolase 10 OS=Homo sapie     | 21.14545871 |
| High | P13647 | Keratin, type II cytoskeletal 5 OS=Homo sapiens OX=9606    | 21.14504608 |
| High | P18031 | Tyrosine-protein phosphatase non-receptor type 1 OS=Ho     | 21.14189246 |
| High | P05783 | Keratin, type I cytoskeletal 18 OS=Homo sapiens OX=9606    | 21.09467842 |
| High | Q9NR30 | Nucleolar RNA helicase 2 OS=Homo sapiens OX=9606 GN=       | 20.99721201 |
| High | P36776 | Lon protease homolog, mitochondrial OS=Homo sapiens O      | 20.91070721 |
| High | Q16555 | Dihydropyrimidinase-related protein 2 OS=Homo sapiens      | 20.88100518 |
| High | Q9NTJ3 | Structural maintenance of chromosomes protein 4 OS=Ho      | 20.80928298 |
| High | P00387 | NADH-cytochrome b5 reductase 3 OS=Homo sapiens OX=         | 20.76544399 |
| High | O00231 | 26S proteasome non-ATPase regulatory subunit 11 OS=Ho      | 20.71947243 |
| High | O95747 | Serine/threonine-protein kinase OSR1 OS=Homo sapiens       | 20.71879015 |
| High | Q8N1G4 | Leucine-rich repeat-containing protein 47 OS=Homo sapie    | 20.64769351 |
| High | Q13283 | Ras GTPase-activating protein-binding protein 1 OS=Homo    | 20.6110282  |
| High | P40937 | Replication factor C subunit 5 OS=Homo sapiens OX=9606     | 20.59089433 |
| High | P36873 | Serine/threonine-protein phosphatase PP1-gamma cataly      | 20.54183127 |
| High | Q9Y6C9 | Mitochondrial carrier homolog 2 OS=Homo sapiens OX=9       | 20.53725522 |
| High | Q9UQ80 | Proliferation-associated protein 2G4 OS=Homo sapiens O     | 20.53008132 |
| High | P55039 | Developmentally-regulated GTP-binding protein 2 OS=Ho      | 20.52902695 |
| High | O43795 | Unconventional myosin-Ib OS=Homo sapiens OX=9606 GN=       | 20.47385926 |
| High | O60506 | Heterogeneous nuclear ribonucleoprotein Q OS=Homo sa       | 20.42452271 |
| High | Q13098 | COP9 signalosome complex subunit 1 OS=Homo sapiens O       | 20.26315635 |
| High | O95347 | Structural maintenance of chromosomes protein 2 OS=Ho      | 20.2388075  |
| High | Q07065 | Cytoskeleton-associated protein 4 OS=Homo sapiens OX=      | 20.16299725 |
| High | P56545 | C-terminal-binding protein 2 OS=Homo sapiens OX=9606       | 20.15683339 |
| High | P35232 | Prohibitin OS=Homo sapiens OX=9606 GN=PHB PE=1 SV=         | 20.0672958  |
| High | P48444 | Coatomer subunit delta OS=Homo sapiens OX=9606 GN=         | 20.06251436 |
| High | Q99497 | Protein/nucleic acid deglycase DJ-1 OS=Homo sapiens OX     | 20.04474666 |
| High | Q7Z2W4 | Zinc finger CCCH-type antiviral protein 1 OS=Homo sapier   | 19.9753519  |
| High | Q9BXP5 | Serrate RNA effector molecule homolog OS=Homo sapier       | 19.94651817 |
| High | Q9Y6M1 | Insulin-like growth factor 2 mRNA-binding protein 2 OS=H   | 19.93215476 |
| High | P46977 | Dolichyl-diphosphooligosaccharide--protein glycosyltrans   | 19.87904452 |
| High | Q96RP9 | Elongation factor G, mitochondrial OS=Homo sapiens OX=     | 19.760154   |
| High | P05091 | Aldehyde dehydrogenase, mitochondrial OS=Homo sapier       | 19.69789918 |
| High | P23526 | Adenosylhomocysteinase OS=Homo sapiens OX=9606 GN=         | 19.642426   |
| High | Q13363 | C-terminal-binding protein 1 OS=Homo sapiens OX=9606       | 19.57477692 |

|      |          |                                                            |             |
|------|----------|------------------------------------------------------------|-------------|
| High | P17858   | ATP-dependent 6-phosphofructokinase, liver type OS=Ho      | 19.56896506 |
| High | P62979   | Ubiquitin-40S ribosomal protein S27a OS=Homo sapiens C     | 19.55680372 |
| High | O94906   | Pre-mRNA-processing factor 6 OS=Homo sapiens OX=960        | 19.49325291 |
| High | O14654   | Insulin receptor substrate 4 OS=Homo sapiens OX=9606 G     | 19.4460861  |
| High | Q13151   | Heterogeneous nuclear ribonucleoprotein A0 OS=Homo s       | 19.44161825 |
| High | Q96RG2   | PAS domain-containing serine/threonine-protein kinase C    | 19.41048152 |
| High | P26196   | Probable ATP-dependent RNA helicase DDX6 OS=Homo sa        | 19.3852614  |
| High | Q9H3U1   | Protein unc-45 homolog A OS=Homo sapiens OX=9606 GN        | 19.28652191 |
| High | P52294   | Importin subunit alpha-5 OS=Homo sapiens OX=9606 GN=       | 19.27031518 |
| High | P62241   | 40S ribosomal protein S8 OS=Homo sapiens OX=9606 GN=       | 19.23852027 |
| High | O15111   | Inhibitor of nuclear factor kappa-B kinase subunit alpha O | 19.22493662 |
| High | P28288   | ATP-binding cassette sub-family D member 3 OS=Homo sa      | 19.20502412 |
| High | P62805   | Histone H4 OS=Homo sapiens OX=9606 GN=HIST1H4A PE          | 19.14906295 |
| High | Q9P035   | Very-long-chain (3R)-3-hydroxyacyl-CoA dehydratase 3 OS    | 19.11354943 |
| High | P30041   | Peroxiredoxin-6 OS=Homo sapiens OX=9606 GN=PRDX6 F         | 19.0927603  |
| High | P62258   | 14-3-3 protein epsilon OS=Homo sapiens OX=9606 GN=Y        | 18.92495013 |
| High | Q13895   | Bystin OS=Homo sapiens OX=9606 GN=BYSL PE=1 SV=3           | 18.90524749 |
| High | Q16222   | UDP-N-acetylhexosamine pyrophosphorylase OS=Homo s         | 18.8328757  |
| High | O15294   | UDP-N-acetylglucosamine--peptide N-acetylglucosaminyl      | 18.811273   |
| High | Q14498   | RNA-binding protein 39 OS=Homo sapiens OX=9606 GN=F        | 18.77334871 |
| High | P55036   | 26S proteasome non-ATPase regulatory subunit 4 OS=Ho       | 18.71023952 |
| High | P06730   | Eukaryotic translation initiation factor 4E OS=Homo sapie  | 18.61058236 |
| High | Q99873   | Protein arginine N-methyltransferase 1 OS=Homo sapiens     | 18.56214875 |
| High | O75390   | Citrate synthase, mitochondrial OS=Homo sapiens OX=96      | 18.54863779 |
| High | Q15008   | 26S proteasome non-ATPase regulatory subunit 6 OS=Ho       | 18.52420994 |
| High | P11172   | Uridine 5'-monophosphate synthase OS=Homo sapiens O        | 18.5193311  |
| High | A0A075B6 | Immunoglobulin kappa variable 2D-29 OS=Homo sapiens        | 18.5039633  |
| High | P61019   | Ras-related protein Rab-2A OS=Homo sapiens OX=9606 G       | 18.49870873 |
| High | Q9BXW7   | Haloacid dehalogenase-like hydrolase domain-containing     | 18.43916684 |
| High | P02533   | Keratin, type I cytoskeletal 14 OS=Homo sapiens OX=960     | 18.3432116  |
| High | P13489   | Ribonuclease inhibitor OS=Homo sapiens OX=9606 GN=RI       | 18.30773535 |
| High | P30101   | Protein disulfide-isomerase A3 OS=Homo sapiens OX=960      | 18.2674419  |
| High | Q9GZZ9   | Ubiquitin-like modifier-activating enzyme 5 OS=Homo sap    | 18.22946107 |
| High | Q96IJ6   | Mannose-1-phosphate guanyltransferase alpha OS=Homoc       | 18.22924731 |
| High | P38117   | Electron transfer flavoprotein subunit beta OS=Homo sap    | 18.22352219 |
| High | Q04760   | Lactoylglutathione lyase OS=Homo sapiens OX=9606 GN=       | 18.18885974 |
| High | Q15019   | Septin-2 OS=Homo sapiens OX=9606 GN=SEPT2 PE=1 SV=         | 18.17732381 |
| High | Q8TEX9   | Importin-4 OS=Homo sapiens OX=9606 GN=IPO4 PE=1 SV         | 18.12659361 |
| High | P53396   | ATP-citrate synthase OS=Homo sapiens OX=9606 GN=ACL        | 18.11754031 |
| High | Q05193   | Dynammin-1 OS=Homo sapiens OX=9606 GN=DNM1 PE=1 S          | 18.10660925 |
| High | Q8NBF2   | NHL repeat-containing protein 2 OS=Homo sapiens OX=96      | 18.08034135 |
| High | Q5TDH0   | Protein DDI1 homolog 2 OS=Homo sapiens OX=9606 GN=         | 17.99482262 |
| High | O95376   | E3 ubiquitin-protein ligase ARIH2 OS=Homo sapiens OX=9     | 17.98937235 |
| High | Q92667   | A-kinase anchor protein 1, mitochondrial OS=Homo sapie     | 17.98034209 |
| High | Q93008   | Probable ubiquitin carboxyl-terminal hydrolase FAF-X OS=   | 17.82344074 |
| High | Q9BZZ5   | Apoptosis inhibitor 5 OS=Homo sapiens OX=9606 GN=API       | 17.79700793 |
| High | A0AVT1   | Ubiquitin-like modifier-activating enzyme 6 OS=Homo sap    | 17.70693502 |
| High | P49593   | Protein phosphatase 1F OS=Homo sapiens OX=9606 GN=I        | 17.6609318  |
| High | O00425   | Insulin-like growth factor 2 mRNA-binding protein 3 OS=H   | 17.63597113 |
| High | O75746   | Calcium-binding mitochondrial carrier protein Aralar1 OS=  | 17.62490351 |

|      |        |                                                            |             |
|------|--------|------------------------------------------------------------|-------------|
| High | A1L0T0 | Acetolactate synthase-like protein OS=Homo sapiens OX=     | 17.60229801 |
| High | P38606 | V-type proton ATPase catalytic subunit A OS=Homo sapie     | 17.54269066 |
| High | P51570 | Galactokinase OS=Homo sapiens OX=9606 GN=GALK1 PE-         | 17.52019703 |
| High | P58107 | Epiplakin OS=Homo sapiens OX=9606 GN=EPPK1 PE=1 SV         | 17.45575378 |
| High | O00469 | Procollagen-lysine,2-oxoglutarate 5-dioxygenase 2 OS=Hc    | 17.41114142 |
| High | P24941 | Cyclin-dependent kinase 2 OS=Homo sapiens OX=9606 Gf       | 17.37245663 |
| High | Q9BRX2 | Protein pelota homolog OS=Homo sapiens OX=9606 GN=I        | 17.35404212 |
| High | P40926 | Malate dehydrogenase, mitochondrial OS=Homo sapiens        | 17.23691977 |
| High | Q9Y4C2 | TRPM8 channel-associated factor 1 OS=Homo sapiens OX       | 17.17242286 |
| High | Q9P289 | Serine/threonine-protein kinase 26 OS=Homo sapiens OX      | 17.1433719  |
| High | O94905 | Erlin-2 OS=Homo sapiens OX=9606 GN=ERLIN2 PE=1 SV=J        | 17.10054376 |
| High | P62917 | 60S ribosomal protein L8 OS=Homo sapiens OX=9606 GN:       | 16.96321373 |
| High | Q9H845 | Acyl-CoA dehydrogenase family member 9, mitochondria       | 16.89371063 |
| High | Q14315 | Filamin-C OS=Homo sapiens OX=9606 GN=FLNC PE=1 SV=         | 16.88418115 |
| High | Q12906 | Interleukin enhancer-binding factor 3 OS=Homo sapiens C    | 16.87329488 |
| High | Q6DKJ4 | Nucleoredoxin OS=Homo sapiens OX=9606 GN=NXN PE=J          | 16.81838933 |
| High | O15371 | Eukaryotic translation initiation factor 3 subunit D OS=Ho | 16.78273887 |
| High | Q96D46 | 60S ribosomal export protein NMD3 OS=Homo sapiens O        | 16.76182946 |
| High | O60814 | Histone H2B type 1-K OS=Homo sapiens OX=9606 GN=HIS        | 16.73429188 |
| High | Q99956 | Dual specificity protein phosphatase 9 OS=Homo sapiens     | 16.66575243 |
| High | P49005 | DNA polymerase delta subunit 2 OS=Homo sapiens OX=96       | 16.65572297 |
| High | Q14152 | Eukaryotic translation initiation factor 3 subunit A OS=Ho | 16.62988376 |
| High | Q8N684 | Cleavage and polyadenylation specificity factor subunit 7  | 16.62359558 |
| High | Q9BVP2 | Guanine nucleotide-binding protein-like 3 OS=Homo sapie    | 16.56104182 |
| High | P61247 | 40S ribosomal protein S3a OS=Homo sapiens OX=9606 Gf       | 16.4205613  |
| High | O00232 | 26S proteasome non-ATPase regulatory subunit 12 OS=Hc      | 16.36237974 |
| High | P51617 | Interleukin-1 receptor-associated kinase 1 OS=Homo sapi    | 16.3234028  |
| High | Q92900 | Regulator of nonsense transcripts 1 OS=Homo sapiens OX     | 16.22871142 |
| High | Q16822 | Phosphoenolpyruvate carboxykinase [GTP], mitochondria      | 16.22165803 |
| High | Q9BWF3 | RNA-binding protein 4 OS=Homo sapiens OX=9606 GN=RT        | 16.19941211 |
| High | Q6YN16 | Hydroxysteroid dehydrogenase-like protein 2 OS=Homo s      | 16.17295036 |
| High | Q9P258 | Protein RCC2 OS=Homo sapiens OX=9606 GN=RCC2 PE=1          | 16.16055012 |
| High | O95340 | Bifunctional 3'-phosphoadenosine 5'-phosphosulfate synt    | 16.11364597 |
| High | P49642 | DNA primase small subunit OS=Homo sapiens OX=9606 G        | 16.08534238 |
| High | Q9Y697 | Cysteine desulfurase, mitochondrial OS=Homo sapiens O)     | 16.05188816 |
| High | P13010 | X-ray repair cross-complementing protein 5 OS=Homo sap     | 15.94329532 |
| High | P00403 | Cytochrome c oxidase subunit 2 OS=Homo sapiens OX=96       | 15.92896831 |
| High | O94925 | Glutaminase kidney isoform, mitochondrial OS=Homo sap      | 15.87851723 |
| High | Q15717 | ELAV-like protein 1 OS=Homo sapiens OX=9606 GN=ELAV        | 15.80827704 |
| High | Q03252 | Lamin-B2 OS=Homo sapiens OX=9606 GN=LMNB2 PE=1 S           | 15.79933835 |
| High | Q00341 | Vigilin OS=Homo sapiens OX=9606 GN=HDLBP PE=1 SV=2         | 15.73749004 |
| High | O15269 | Serine palmitoyltransferase 1 OS=Homo sapiens OX=9606      | 15.71147483 |
| High | P55010 | Eukaryotic translation initiation factor 5 OS=Homo sapien  | 15.58960105 |
| High | Q9BXJ9 | N-alpha-acetyltransferase 15, NatA auxiliary subunit OS=H  | 15.54091118 |
| High | P47985 | Cytochrome b-c1 complex subunit Rieske, mitochondrial (    | 15.48875037 |
| High | Q13409 | Cytoplasmic dynein 1 intermediate chain 2 OS=Homo sap      | 15.46988188 |
| High | Q9Y312 | Protein AAR2 homolog OS=Homo sapiens OX=9606 GN=A          | 15.43885646 |
| High | P25325 | 3-mercaptopyruvate sulfurtransferase OS=Homo sapiens       | 15.29086699 |
| High | Q96F86 | Enhancer of mRNA-decapping protein 3 OS=Homo sapien        | 15.25039928 |
| High | Q9C0C9 | (E3-independent) E2 ubiquitin-conjugating enzyme OS=Hc     | 15.2427039  |

|      |        |                                                                                                 |             |
|------|--------|-------------------------------------------------------------------------------------------------|-------------|
| High | Q15084 | Protein disulfide-isomerase A6 OS=Homo sapiens OX=9606 GN=PII5                                  | 15.21263783 |
| High | P16152 | Carbonyl reductase [NADPH] 1 OS=Homo sapiens OX=9606 GN=CBR1                                    | 15.20405399 |
| High | Q8TD19 | Serine/threonine-protein kinase Nek9 OS=Homo sapiens OX=9606 GN=NEK9                            | 15.18448891 |
| High | Q9Y5L0 | Transportin-3 OS=Homo sapiens OX=9606 GN=TNPO3 PE=1.0                                           | 15.14566576 |
| High | O60884 | DnaJ homolog subfamily A member 2 OS=Homo sapiens OX=9606 GN=DNAJ2                              | 15.11797531 |
| High | Q9NZN3 | EH domain-containing protein 3 OS=Homo sapiens OX=9606 GN=EH3                                   | 15.05772858 |
| High | P61981 | 14-3-3 protein gamma OS=Homo sapiens OX=9606 GN=14333                                           | 15.05729689 |
| High | Q13347 | Eukaryotic translation initiation factor 3 subunit I OS=Homo sapiens OX=9606 GN=EIF3I           | 15.04863642 |
| High | P52888 | Thimet oligopeptidase OS=Homo sapiens OX=9606 GN=THOP1                                          | 15.03705744 |
| High | Q7Z2T5 | TRMT1-like protein OS=Homo sapiens OX=9606 GN=TRMT1L                                            | 15.03614366 |
| High | Q8IU8  | Cytokine receptor-like factor 3 OS=Homo sapiens OX=9606 GN=CLF3                                 | 14.96029127 |
| High | P13674 | Prolyl 4-hydroxylase subunit alpha-1 OS=Homo sapiens OX=9606 GN=PHL1                            | 14.92030497 |
| High | Q8TC12 | Retinol dehydrogenase 11 OS=Homo sapiens OX=9606 GN=RHDH11                                      | 14.91775681 |
| High | P46783 | 40S ribosomal protein S10 OS=Homo sapiens OX=9606 GN=40S10                                      | 14.91595507 |
| High | Q14739 | Lamin-B receptor OS=Homo sapiens OX=9606 GN=LBR PE=1.0                                          | 14.88993333 |
| High | P53985 | Monocarboxylate transporter 1 OS=Homo sapiens OX=9606 GN=SLC6A1                                 | 14.85331167 |
| High | P05198 | Eukaryotic translation initiation factor 2 subunit 1 OS=Homo sapiens OX=9606 GN=EIF2S1          | 14.84762675 |
| High | P67809 | Nuclease-sensitive element-binding protein 1 OS=Homo sapiens OX=9606 GN=NS1                     | 14.78905863 |
| High | Q04323 | UBX domain-containing protein 1 OS=Homo sapiens OX=9606 GN=UBX1                                 | 14.76918214 |
| High | P53007 | Tricarboxylate transport protein, mitochondrial OS=Homo sapiens OX=9606 GN=TRC1                 | 14.70965965 |
| High | Q9NVE7 | Pantothenate kinase 4 OS=Homo sapiens OX=9606 GN=PKN4                                           | 14.67367167 |
| High | Q8IUF8 | Ribosomal oxygenase 2 OS=Homo sapiens OX=9606 GN=RBO2                                           | 14.66416824 |
| High | O43684 | Mitotic checkpoint protein BUB3 OS=Homo sapiens OX=9606 GN=BUB3                                 | 14.59405982 |
| High | O43172 | U4/U6 small nuclear ribonucleoprotein Prp4 OS=Homo sapiens OX=9606 GN=PRP4                      | 14.50874884 |
| High | Q09161 | Nuclear cap-binding protein subunit 1 OS=Homo sapiens OX=9606 GN=NCBP1                          | 14.48591132 |
| High | O75821 | Eukaryotic translation initiation factor 3 subunit G OS=Homo sapiens OX=9606 GN=EIF3G           | 14.45384885 |
| High | Q92930 | Ras-related protein Rab-8B OS=Homo sapiens OX=9606 GN=RAB8B                                     | 14.36604348 |
| High | Q92797 | Symplekin OS=Homo sapiens OX=9606 GN=SYMPK PE=1.0                                               | 14.36546968 |
| High | Q92769 | Histone deacetylase 2 OS=Homo sapiens OX=9606 GN=HDAC2                                          | 14.35873078 |
| High | Q9UNE7 | E3 ubiquitin-protein ligase CHIP OS=Homo sapiens OX=9606 GN=CHIP                                | 14.30328149 |
| High | P62244 | 40S ribosomal protein S15a OS=Homo sapiens OX=9606 GN=40S15a                                    | 14.27740071 |
| High | O60488 | Long-chain-fatty-acid--CoA ligase 4 OS=Homo sapiens OX=9606 GN=ACLY4                            | 14.24232715 |
| High | Q8N766 | ER membrane protein complex subunit 1 OS=Homo sapiens OX=9606 GN=EMPC1                          | 14.23000615 |
| High | Q9BSJ8 | Extended synaptotagmin-1 OS=Homo sapiens OX=9606 GN=SYT1                                        | 14.21433507 |
| High | P31946 | 14-3-3 protein beta/alpha OS=Homo sapiens OX=9606 GN=14332                                      | 14.15617676 |
| High | Q9H0C8 | Integrin-linked kinase-associated serine/threonine phosphatase OS=Homo sapiens OX=9606 GN=ILKAP | 14.04991677 |
| High | Q12874 | Splicing factor 3A subunit 3 OS=Homo sapiens OX=9606 GN=SF3A3                                   | 13.99335801 |
| High | Q92615 | La-related protein 4B OS=Homo sapiens OX=9606 GN=LAI4B                                          | 13.84877647 |
| High | Q9Y5M8 | Signal recognition particle receptor subunit beta OS=Homo sapiens OX=9606 GN=SRPbeta            | 13.84105705 |
| High | P27348 | 14-3-3 protein theta OS=Homo sapiens OX=9606 GN=14334                                           | 13.81266304 |
| High | P62269 | 40S ribosomal protein S18 OS=Homo sapiens OX=9606 GN=40S18                                      | 13.80119209 |
| High | Q06124 | Tyrosine-protein phosphatase non-receptor type 11 OS=Homo sapiens OX=9606 GN=SHPTP11            | 13.78905964 |
| High | P52789 | Hexokinase-2 OS=Homo sapiens OX=9606 GN=HK2 PE=1.0                                              | 13.78849892 |
| High | Q5JPE7 | Nodal modulator 2 OS=Homo sapiens OX=9606 GN=NOM2                                               | 13.71377408 |
| High | Q9BQ67 | Glutamate-rich WD repeat-containing protein 1 OS=Homo sapiens OX=9606 GN=GRWD1                  | 13.64524651 |
| High | Q53GQ0 | Very-long-chain 3-oxoacyl-CoA reductase OS=Homo sapiens OX=9606 GN=3KCR                         | 13.60733293 |
| High | Q8NBJS | Procollagen galactosyltransferase 1 OS=Homo sapiens OX=9606 GN=PGAL1                            | 13.59807358 |
| High | Q8NI60 | Atypical kinase COQ8A, mitochondrial OS=Homo sapiens OX=9606 GN=COQ8A                           | 13.55742544 |
| High | P11498 | Pyruvate carboxylase, mitochondrial OS=Homo sapiens OX=9606 GN=PC                               | 13.5552288  |
| High | P22234 | Multifunctional protein ADE2 OS=Homo sapiens OX=9606 GN=ADE2                                    | 13.52483764 |

|      |        |                                                                                                     |             |
|------|--------|-----------------------------------------------------------------------------------------------------|-------------|
| High | Q9Y4W6 | AFG3-like protein 2 OS=Homo sapiens OX=9606 GN=AFG3                                                 | 13.49701433 |
| High | Q9NR31 | GTP-binding protein SAR1a OS=Homo sapiens OX=9606 GN=SAR1A                                          | 13.45867835 |
| High | O95573 | Long-chain-fatty-acid--CoA ligase 3 OS=Homo sapiens OX=9606 GN=ACLY3                                | 13.41991082 |
| High | Q92917 | G-patch domain and KOW motifs-containing protein OS=Homo sapiens OX=9606 GN=KOW1                    | 13.38027582 |
| High | P42025 | Beta-centractin OS=Homo sapiens OX=9606 GN=ACTR1B                                                   | 13.37998261 |
| High | Q7L0Y3 | tRNA methyltransferase 10 homolog C OS=Homo sapiens OX=9606 GN=TRMT10C                              | 13.31574193 |
| High | Q8IXI2 | Mitochondrial Rho GTPase 1 OS=Homo sapiens OX=9606 GN=RHOF1                                         | 13.30420587 |
| High | Q8NF37 | Lysophosphatidylcholine acyltransferase 1 OS=Homo sapiens OX=9606 GN=LPCAT1                         | 13.12053593 |
| High | P57737 | Coronin-7 OS=Homo sapiens OX=9606 GN=CORO7 PE=1 SV=1                                                | 13.0940837  |
| High | Q9H9P8 | L-2-hydroxyglutarate dehydrogenase, mitochondrial OS=Homo sapiens OX=9606 GN=L2HGDH                 | 13.05983592 |
| High | Q9NRF8 | CTP synthase 2 OS=Homo sapiens OX=9606 GN=CTPS2 PE=1 SV=1                                           | 12.96028388 |
| High | O75152 | Zinc finger CCCH domain-containing protein 11A OS=Homo sapiens OX=9606 GN=ZFP111A                   | 12.9499376  |
| High | P11216 | Glycogen phosphorylase, brain form OS=Homo sapiens OX=9606 GN=PYGL                                  | 12.87259187 |
| High | O60684 | Importin subunit alpha-7 OS=Homo sapiens OX=9606 GN=IMP7                                            | 12.86092565 |
| High | P04075 | Fructose-bisphosphate aldolase A OS=Homo sapiens OX=9606 GN=ALDOA                                   | 12.85095287 |
| High | Q29RF7 | Sister chromatid cohesion protein PDS5 homolog A OS=Homo sapiens OX=9606 GN=PDS5A                   | 12.81662591 |
| High | O75155 | Cullin-associated NEDD8-dissociated protein 2 OS=Homo sapiens OX=9606 GN=CAND1                      | 12.81030596 |
| High | P46778 | 60S ribosomal protein L21 OS=Homo sapiens OX=9606 GN=L21                                            | 12.77190744 |
| High | Q5T6V5 | Queuosine salvage protein OS=Homo sapiens OX=9606 GN=QSOX1                                          | 12.71832042 |
| High | P06744 | Glucose-6-phosphate isomerase OS=Homo sapiens OX=9606 GN=PFKP                                       | 12.67688037 |
| High | P04637 | Cellular tumor antigen p53 OS=Homo sapiens OX=9606 GN=TP53                                          | 12.65845348 |
| High | O75439 | Mitochondrial-processing peptidase subunit beta OS=Homo sapiens OX=9606 GN=PP2C                     | 12.52455135 |
| High | P46781 | 40S ribosomal protein S9 OS=Homo sapiens OX=9606 GN=S9                                              | 12.48779164 |
| High | Q9UHD8 | Septin-9 OS=Homo sapiens OX=9606 GN=SEPT9 PE=1 SV=1                                                 | 12.48452518 |
| High | O00299 | Chloride intracellular channel protein 1 OS=Homo sapiens OX=9606 GN=CLIC1                           | 12.47407245 |
| High | Q9NPQ8 | Synembryn-A OS=Homo sapiens OX=9606 GN=RIC8A PE=1 SV=1                                              | 12.47113108 |
| High | P34932 | Heat shock 70 kDa protein 4 OS=Homo sapiens OX=9606 GN=HSP70                                        | 12.4697613  |
| High | P61619 | Protein transport protein Sec61 subunit alpha isoform 1 C OS=Homo sapiens OX=9606 GN=SEC61A1C       | 12.43851692 |
| High | Q15031 | Probable leucine--tRNA ligase, mitochondrial OS=Homo sapiens OX=9606 GN=LIG4                        | 12.40655658 |
| High | Q9BPX3 | Condensin complex subunit 3 OS=Homo sapiens OX=9606 GN=CCNC3                                        | 12.35400963 |
| High | Q9NVH2 | Integrator complex subunit 7 OS=Homo sapiens OX=9606 GN=INTS7                                       | 12.30752218 |
| High | P20339 | Ras-related protein Rab-5A OS=Homo sapiens OX=9606 GN=RAB5A                                         | 12.19256087 |
| High | P61160 | Actin-related protein 2 OS=Homo sapiens OX=9606 GN=ARPC2                                            | 12.13233296 |
| High | O75477 | Erlin-1 OS=Homo sapiens OX=9606 GN=ERLIN1 PE=1 SV=1                                                 | 12.13027081 |
| High | Q13162 | Peroxiredoxin-4 OS=Homo sapiens OX=9606 GN=PRDX4                                                    | 11.9970948  |
| High | Q9H2U2 | Inorganic pyrophosphatase 2, mitochondrial OS=Homo sapiens OX=9606 GN=PP2C                          | 11.99335903 |
| High | O14879 | Interferon-induced protein with tetratricopeptide repeats 1 OS=Homo sapiens OX=9606 GN=IFITM1       | 11.93458046 |
| High | P51114 | Fragile X mental retardation syndrome-related protein 1 OS=Homo sapiens OX=9606 GN=FXR1             | 11.93444288 |
| High | E9PAV3 | Nascent polypeptide-associated complex subunit alpha, non-catalytic OS=Homo sapiens OX=9606 GN=NPA3 | 11.91955993 |
| High | Q96A33 | Coiled-coil domain-containing protein 47 OS=Homo sapiens OX=9606 GN=CDC47                           | 11.88916789 |
| High | Q9P2R7 | Succinate--CoA ligase [ADP-forming] subunit beta, mitochondrial OS=Homo sapiens OX=9606 GN=SUFB     | 11.88538993 |
| High | Q9Y6E2 | Basic leucine zipper and W2 domain-containing protein 2 OS=Homo sapiens OX=9606 GN=BLZ2             | 11.80146408 |
| High | Q71RC2 | La-related protein 4 OS=Homo sapiens OX=9606 GN=LARI4                                               | 11.79357413 |
| High | P21796 | Voltage-dependent anion-selective channel protein 1 OS=Homo sapiens OX=9606 GN=VDAC1                | 11.77606224 |
| High | P02545 | Prelamin-A/C OS=Homo sapiens OX=9606 GN=LMNA PE=1 SV=1                                              | 11.74650963 |
| High | Q95604 | HLA class I histocompatibility antigen, Cw-17 alpha chain OS=Homo sapiens OX=9606 GN=C17A           | 11.72453431 |
| High | Q92696 | Geranylgeranyl transferase type-2 subunit alpha OS=Homo sapiens OX=9606 GN=GGAT2A                   | 11.62822807 |
| High | P61224 | Ras-related protein Rap-1b OS=Homo sapiens OX=9606 GN=RAB1B                                         | 11.62702177 |
| High | Q96KR1 | Zinc finger RNA-binding protein OS=Homo sapiens OX=9606 GN=ZFP100                                   | 11.60318349 |
| High | P53041 | Serine/threonine-protein phosphatase 5 OS=Homo sapiens OX=9606 GN=PPP2R5                            | 11.4904102  |

|      |        |                                                           |             |
|------|--------|-----------------------------------------------------------|-------------|
| High | Q6NUK1 | Calcium-binding mitochondrial carrier protein SCaMC-1 O   | 11.45898223 |
| High | O60841 | Eukaryotic translation initiation factor 5B OS=Homo sapie | 11.40036535 |
| High | O14981 | TATA-binding protein-associated factor 172 OS=Homo sap    | 11.35891212 |
| High | P20340 | Ras-related protein Rab-6A OS=Homo sapiens OX=9606 G      | 11.34285982 |
| High | Q969X5 | Endoplasmic reticulum-Golgi intermediate compartment      | 11.34220199 |
| High | Q15006 | ER membrane protein complex subunit 2 OS=Homo sapie       | 11.31387776 |
| High | Q5JPH6 | Probable glutamate--tRNA ligase, mitochondrial OS=Hom     | 11.31191086 |
| High | P40763 | Signal transducer and activator of transcription 3 OS=Hon | 11.28461597 |
| High | P32119 | Peroxiredoxin-2 OS=Homo sapiens OX=9606 GN=PRDX2 F        | 11.28425027 |
| High | Q15393 | Splicing factor 3B subunit 3 OS=Homo sapiens OX=9606 G    | 11.23917428 |
| High | P60660 | Myosin light polypeptide 6 OS=Homo sapiens OX=9606 G      | 11.21359597 |
| High | Q14203 | Dynactin subunit 1 OS=Homo sapiens OX=9606 GN=DCTN        | 11.19605906 |
| High | P31350 | Ribonucleoside-diphosphate reductase subunit M2 OS=Ho     | 11.15719575 |
| High | Q9UKF6 | Cleavage and polyadenylation specificity factor subunit 3 | 11.15248238 |
| High | O00154 | Cytosolic acyl coenzyme A thioester hydrolase OS=Homo     | 11.06301879 |
| High | O15355 | Protein phosphatase 1G OS=Homo sapiens OX=9606 GN=        | 11.01129344 |
| High | P26373 | 60S ribosomal protein L13 OS=Homo sapiens OX=9606 G       | 10.99606915 |
| High | P61006 | Ras-related protein Rab-8A OS=Homo sapiens OX=9606 G      | 10.96796656 |
| High | O43837 | Isocitrate dehydrogenase [NAD] subunit beta, mitochon     | 10.94116716 |
| High | P37802 | Transgelin-2 OS=Homo sapiens OX=9606 GN=TAGLN2 PE=        | 10.88618338 |
| High | O75663 | TIP41-like protein OS=Homo sapiens OX=9606 GN=TIPRL       | 10.86057223 |
| High | O95232 | Luc7-like protein 3 OS=Homo sapiens OX=9606 GN=LUC7       | 10.85936627 |
| High | P30050 | 60S ribosomal protein L12 OS=Homo sapiens OX=9606 G       | 10.67190798 |
| High | Q8WVC6 | Dephospho-CoA kinase domain-containing protein OS=Ho      | 10.60352724 |
| High | Q9BYW2 | Histone-lysine N-methyltransferase SETD2 OS=Homo sapi     | 10.56193621 |
| High | P83731 | 60S ribosomal protein L24 OS=Homo sapiens OX=9606 G       | 10.54581177 |
| High | P68400 | Casein kinase II subunit alpha OS=Homo sapiens OX=9606    | 10.51444743 |
| High | P09913 | Interferon-induced protein with tetratricopeptide repeats | 10.50484173 |
| High | Q9BV44 | THUMP domain-containing protein 3 OS=Homo sapiens O       | 10.50224604 |
| High | Q96KP4 | Cytosolic non-specific dipeptidase OS=Homo sapiens OX=    | 10.45889377 |
| High | P19367 | Hexokinase-1 OS=Homo sapiens OX=9606 GN=HK1 PE=1 S        | 10.44960017 |
| High | Q9UHB6 | LIM domain and actin-binding protein 1 OS=Homo sapien     | 10.39046236 |
| High | Q6P996 | Pyridoxal-dependent decarboxylase domain-containing pi    | 10.36204118 |
| High | Q14671 | Pumilio homolog 1 OS=Homo sapiens OX=9606 GN=PUM          | 10.34873108 |
| High | P56134 | ATP synthase subunit f, mitochondrial OS=Homo sapiens     | 10.34135212 |
| High | P09661 | U2 small nuclear ribonucleoprotein A' OS=Homo sapiens     | 10.33585153 |
| High | Q9HAV4 | Exportin-5 OS=Homo sapiens OX=9606 GN=XPO5 PE=1 SV        | 10.29956405 |
| High | P62249 | 40S ribosomal protein S16 OS=Homo sapiens OX=9606 G       | 10.27571355 |
| High | Q9UL25 | Ras-related protein Rab-21 OS=Homo sapiens OX=9606 G      | 10.24045264 |
| High | Q9NRG9 | Aladin OS=Homo sapiens OX=9606 GN=AAAS PE=1 SV=1          | 10.23099209 |
| High | Q9Y6B6 | GTP-binding protein SAR1b OS=Homo sapiens OX=9606 G       | 10.20738041 |
| High | P57088 | Transmembrane protein 33 OS=Homo sapiens OX=9606 G        | 10.18836015 |
| High | O43707 | Alpha-actinin-4 OS=Homo sapiens OX=9606 GN=ACTN4 P        | 10.16999709 |
| High | Q16795 | NADH dehydrogenase [ubiquinone] 1 alpha subcomplex s      | 10.16108936 |
| High | Q9Y5A9 | YTH domain-containing family protein 2 OS=Homo sapien     | 10.13160037 |
| High | Q02543 | 60S ribosomal protein L18a OS=Homo sapiens OX=9606 G      | 10.0778478  |
| High | Q9BQA1 | Methylosome protein 50 OS=Homo sapiens OX=9606 GN=        | 10.07254952 |
| High | Q9Y5Q8 | General transcription factor 3C polypeptide 5 OS=Homo s   | 10.06616587 |
| High | P24539 | ATP synthase F(0) complex subunit B1, mitochondrial OS=   | 10.06254396 |
| High | P40429 | 60S ribosomal protein L13a OS=Homo sapiens OX=9606 G      | 10.03228348 |

|      |        |                                                                      |             |
|------|--------|----------------------------------------------------------------------|-------------|
| High | Q12834 | Cell division cycle protein 20 homolog OS=Homo sapiens               | 10.01982331 |
| High | Q15020 | Squamous cell carcinoma antigen recognized by T-cells 3              | 10.0063374  |
| High | Q96552 | GPI transamidase component PIG-S OS=Homo sapiens OX=9606             | 9.966248637 |
| High | O43264 | Centromere/kinetochore protein zw10 homolog OS=Homo sapiens          | 9.950619616 |
| High | P41091 | Eukaryotic translation initiation factor 2 subunit 3 OS=Homo sapiens | 9.932176201 |
| High | Q13564 | NEDD8-activating enzyme E1 regulatory subunit OS=Homo sapiens        | 9.893337169 |
| High | P61254 | 60S ribosomal protein L26 OS=Homo sapiens OX=9606 GN=L26             | 9.882063707 |
| High | Q8WUA2 | Peptidyl-prolyl cis-trans isomerase-like 4 OS=Homo sapiens           | 9.881355417 |
| High | P16278 | Beta-galactosidase OS=Homo sapiens OX=9606 GN=GLB1                   | 9.762933243 |
| High | Q9Y305 | Acyl-coenzyme A thioesterase 9, mitochondrial OS=Homo sapiens        | 9.745275694 |
| High | P14635 | G2/mitotic-specific cyclin-B1 OS=Homo sapiens OX=9606 GN=CYC1        | 9.707389769 |
| High | P50416 | Carnitine O-palmitoyltransferase 1, liver isoform OS=Homo sapiens    | 9.620224402 |
| High | Q52LJ0 | Protein FAM98B OS=Homo sapiens OX=9606 GN=FAM98B                     | 9.59901879  |
| High | P62263 | 40S ribosomal protein S14 OS=Homo sapiens OX=9606 GN=S14             | 9.593589276 |
| High | P23528 | Cofilin-1 OS=Homo sapiens OX=9606 GN=CFL1 PE=1 SV=3                  | 9.554182103 |
| High | P62277 | 40S ribosomal protein S13 OS=Homo sapiens OX=9606 GN=S13             | 9.505349789 |
| High | P61313 | 60S ribosomal protein L15 OS=Homo sapiens OX=9606 GN=L15             | 9.504549469 |
| High | P84098 | 60S ribosomal protein L19 OS=Homo sapiens OX=9606 GN=L19             | 9.486820636 |
| High | Q13505 | Metaxin-1 OS=Homo sapiens OX=9606 GN=MTX1 PE=1 SV=1                  | 9.3723587   |
| High | Q15286 | Ras-related protein Rab-35 OS=Homo sapiens OX=9606 GN=RAB35          | 9.371892072 |
| High | O15344 | E3 ubiquitin-protein ligase Midline-1 OS=Homo sapiens OX=9606        | 9.316009162 |
| High | Q9UI26 | Importin-11 OS=Homo sapiens OX=9606 GN=IPO11 PE=1 SV=1               | 9.289379307 |
| High | Q9NUQ8 | ATP-binding cassette sub-family F member 3 OS=Homo sapiens           | 9.280298204 |
| High | Q13188 | Serine/threonine-protein kinase 3 OS=Homo sapiens OX=9606            | 9.277904018 |
| High | P49959 | Double-strand break repair protein MRE11 OS=Homo sapiens             | 9.241556248 |
| High | Q7L1Q6 | Basic leucine zipper and W2 domain-containing protein 1              | 9.229271691 |
| High | Q96P47 | Arf-GAP with GTPase, ANK repeat and PH domain-containing             | 9.209724006 |
| High | P25786 | Proteasome subunit alpha type-1 OS=Homo sapiens OX=9606              | 9.204446346 |
| High | Q9NTK5 | Obg-like ATPase 1 OS=Homo sapiens OX=9606 GN=OLA1                    | 9.201876904 |
| High | Q8WX92 | Negative elongation factor B OS=Homo sapiens OX=9606 GN=NEF2B        | 9.198805202 |
| High | Q9BVI4 | Nucleolar complex protein 4 homolog OS=Homo sapiens                  | 9.189137909 |
| High | Q13613 | Myotubularin-related protein 1 OS=Homo sapiens OX=9606               | 9.17219395  |
| High | Q92598 | Heat shock protein 105 kDa OS=Homo sapiens OX=9606 GN=HSP105         | 9.158582525 |
| High | P31942 | Heterogeneous nuclear ribonucleoprotein H3 OS=Homo sapiens           | 9.119262759 |
| High | P50213 | Isocitrate dehydrogenase [NAD] subunit alpha, mitochondrial          | 9.116220804 |
| High | Q13617 | Cullin-2 OS=Homo sapiens OX=9606 GN=CUL2 PE=1 SV=2                   | 9.035427683 |
| High | Q9NVH1 | DnaJ homolog subfamily C member 11 OS=Homo sapiens                   | 9.033783603 |
| High | O60313 | Dynamin-like 120 kDa protein, mitochondrial OS=Homo sapiens          | 9.01311206  |
| High | Q14103 | Heterogeneous nuclear ribonucleoprotein D0 OS=Homo sapiens           | 9.00551031  |
| High | Q8TEU7 | Rap guanine nucleotide exchange factor 6 OS=Homo sapiens             | 9.00305021  |
| High | Q3LXA3 | Triokinase/FMN cyclase OS=Homo sapiens OX=9606 GN=TRIO               | 8.965287325 |
| High | Q07666 | KH domain-containing, RNA-binding, signal transduction-associated    | 8.963820808 |
| High | P32189 | Glycerol kinase OS=Homo sapiens OX=9606 GN=GK PE=1 SV=1              | 8.932840702 |
| High | P49321 | Nuclear autoantigenic sperm protein OS=Homo sapiens OX=9606          | 8.8126561   |
| High | Q9HDC9 | Adipocyte plasma membrane-associated protein OS=Homo sapiens         | 8.761859637 |
| High | P06737 | Glycogen phosphorylase, liver form OS=Homo sapiens OX=9606           | 8.751803088 |
| High | P62750 | 60S ribosomal protein L23a OS=Homo sapiens OX=9606 GN=L23A           | 8.746386814 |
| High | Q16630 | Cleavage and polyadenylation specificity factor subunit 6            | 8.741241974 |
| High | P48739 | Phosphatidylinositol transfer protein beta isoform OS=Homo sapiens   | 8.716456495 |
| High | Q9HCC0 | Methylcrotonoyl-CoA carboxylase beta chain, mitochondrial            | 8.710119724 |

|      |        |                                                               |             |
|------|--------|---------------------------------------------------------------|-------------|
| High | Q5W0B1 | RING finger protein 219 OS=Homo sapiens OX=9606 GN=I          | 8.693822893 |
| High | Q07020 | 60S ribosomal protein L18 OS=Homo sapiens OX=9606 GN=         | 8.677591075 |
| High | Q9P287 | BRCA2 and CDKN1A-interacting protein OS=Homo sapiens          | 8.66941652  |
| High | P61764 | Syntaxin-binding protein 1 OS=Homo sapiens OX=9606 GN=        | 8.649947381 |
| High | P24534 | Elongation factor 1-beta OS=Homo sapiens OX=9606 GN=          | 8.606924128 |
| High | Q12849 | G-rich sequence factor 1 OS=Homo sapiens OX=9606 GN=          | 8.597399416 |
| High | O15027 | Protein transport protein Sec16A OS=Homo sapiens OX=9         | 8.589699133 |
| High | P12532 | Creatine kinase U-type, mitochondrial OS=Homo sapiens         | 8.588181894 |
| High | P29992 | Guanine nucleotide-binding protein subunit alpha-11 OS=       | 8.586031488 |
| High | Q9H857 | 5'-nucleotidase domain-containing protein 2 OS=Homo sa        | 8.568433162 |
| High | Q3MHD2 | Protein LSM12 homolog OS=Homo sapiens OX=9606 GN=             | 8.563143355 |
| High | P46777 | 60S ribosomal protein L5 OS=Homo sapiens OX=9606 GN=          | 8.545201435 |
| High | P47756 | F-actin-capping protein subunit beta OS=Homo sapiens O        | 8.5350731   |
| High | P56537 | Eukaryotic translation initiation factor 6 OS=Homo sapien     | 8.492192416 |
| High | O15270 | Serine palmitoyltransferase 2 OS=Homo sapiens OX=9606         | 8.484685936 |
| High | P50402 | Emerin OS=Homo sapiens OX=9606 GN=EMD PE=1 SV=1               | 8.475214551 |
| High | Q92621 | Nuclear pore complex protein Nup205 OS=Homo sapiens           | 8.406689728 |
| High | Q2TAL8 | Glutamine-rich protein 1 OS=Homo sapiens OX=9606 GN=          | 8.39823493  |
| High | Q96N67 | Dedicator of cytokinesis protein 7 OS=Homo sapiens OX=9       | 8.395783447 |
| High | O00505 | Importin subunit alpha-4 OS=Homo sapiens OX=9606 GN=          | 8.377794269 |
| High | Q16531 | DNA damage-binding protein 1 OS=Homo sapiens OX=960           | 8.370794139 |
| High | Q9C0B1 | Alpha-ketoglutarate-dependent dioxygenase FTO OS=Hor          | 8.367449441 |
| High | P50502 | Hsc70-interacting protein OS=Homo sapiens OX=9606 GN          | 8.345646824 |
| High | Q9NS69 | Mitochondrial import receptor subunit TOM22 homolog C         | 8.340205457 |
| High | Q5JTV8 | Torsin-1A-interacting protein 1 OS=Homo sapiens OX=960        | 8.272865381 |
| High | Q2VPK5 | Cytoplasmic tRNA 2-thiolation protein 2 OS=Homo sapien        | 8.266717136 |
| High | Q7L8L6 | FAST kinase domain-containing protein 5, mitochondrial C      | 8.21756364  |
| High | P50395 | Rab GDP dissociation inhibitor beta OS=Homo sapiens OX        | 8.210200363 |
| High | P62847 | 40S ribosomal protein S24 OS=Homo sapiens OX=9606 GN          | 8.177807002 |
| High | Q13112 | Chromatin assembly factor 1 subunit B OS=Homo sapiens         | 8.165302148 |
| High | P36542 | ATP synthase subunit gamma, mitochondrial OS=Homo sa          | 8.16478626  |
| High | Q9Y3A5 | Ribosome maturation protein SBDS OS=Homo sapiens OX           | 8.156984803 |
| High | P45954 | Short/branched chain specific acyl-CoA dehydrogenase, m       | 8.14892544  |
| High | Q86WB0 | Nuclear-interacting partner of ALK OS=Homo sapiens OX=        | 8.14018286  |
| High | Q99798 | Aconitate hydratase, mitochondrial OS=Homo sapiens OX         | 8.13611637  |
| High | Q9Y5V3 | Melanoma-associated antigen D1 OS=Homo sapiens OX=9           | 8.113718509 |
| High | Q9UKX7 | Nuclear pore complex protein Nup50 OS=Homo sapiens C          | 8.112386975 |
| High | Q96L92 | Sorting nexin-27 OS=Homo sapiens OX=9606 GN=SNX27 F           | 8.104606187 |
| High | P62899 | 60S ribosomal protein L31 OS=Homo sapiens OX=9606 GN          | 8.095935361 |
| High | P53350 | Serine/threonine-protein kinase PLK1 OS=Homo sapiens C        | 8.064629442 |
| High | B5ME19 | Eukaryotic translation initiation factor 3 subunit C-like pro | 8.033838736 |
| High | P63010 | AP-2 complex subunit beta OS=Homo sapiens OX=9606 G           | 8.001570379 |
| High | P31153 | S-adenosylmethionine synthase isoform type-2 OS=Homc          | 7.956926831 |
| High | Q9Y613 | FH1/FH2 domain-containing protein 1 OS=Homo sapiens           | 7.944459068 |
| High | Q9UHD2 | Serine/threonine-protein kinase TBK1 OS=Homo sapiens C        | 7.921353787 |
| High | Q12800 | Alpha-globin transcription factor CP2 OS=Homo sapiens C       | 7.914224368 |
| High | Q8WXF1 | Paraspeckle component 1 OS=Homo sapiens OX=9606 GN            | 7.86585152  |
| High | P23381 | Tryptophan--tRNA ligase, cytoplasmic OS=Homo sapiens C        | 7.85612122  |
| High | Q5VUA4 | Zinc finger protein 318 OS=Homo sapiens OX=9606 GN=Z          | 7.834862079 |
| High | Q96HC4 | PDZ and LIM domain protein 5 OS=Homo sapiens OX=960           | 7.827504184 |

|      |        |                                                           |             |
|------|--------|-----------------------------------------------------------|-------------|
| High | Q15907 | Ras-related protein Rab-11B OS=Homo sapiens OX=9606       | 7.811636789 |
| High | Q15555 | Microtubule-associated protein RP/EB family member 2 C    | 7.749152258 |
| High | Q9UHD1 | Cysteine and histidine-rich domain-containing protein 1 C | 7.740529404 |
| High | A6NDG6 | Glycerol-3-phosphate phosphatase OS=Homo sapiens OX=      | 7.731672111 |
| High | Q15003 | Condensin complex subunit 2 OS=Homo sapiens OX=9606       | 7.609002454 |
| High | Q9BT78 | COP9 signalosome complex subunit 4 OS=Homo sapiens C      | 7.606089002 |
| High | Q10567 | AP-1 complex subunit beta-1 OS=Homo sapiens OX=9606       | 7.604121626 |
| High | Q9UM00 | Calcium load-activated calcium channel OS=Homo sapien     | 7.58772766  |
| High | P26038 | Moesin OS=Homo sapiens OX=9606 GN=MSN PE=1 SV=3           | 7.566788946 |
| High | Q92552 | 28S ribosomal protein S27, mitochondrial OS=Homo sapie    | 7.562306949 |
| High | Q7L014 | Probable ATP-dependent RNA helicase DDX46 OS=Homo         | 7.555848105 |
| High | Q9UBX3 | Mitochondrial dicarboxylate carrier OS=Homo sapiens OX    | 7.553542942 |
| High | O00487 | 26S proteasome non-ATPase regulatory subunit 14 OS=Ho     | 7.552494672 |
| High | Q9BUK6 | Protein misato homolog 1 OS=Homo sapiens OX=9606 GN       | 7.516473748 |
| High | Q9H583 | HEAT repeat-containing protein 1 OS=Homo sapiens OX=9     | 7.494312091 |
| High | Q04206 | Transcription factor p65 OS=Homo sapiens OX=9606 GN=      | 7.428492877 |
| High | Q9H078 | Caseinolytic peptidase B protein homolog OS=Homo sapie    | 7.415887561 |
| High | P27695 | DNA-(apurinic or apyrimidinic site) lyase OS=Homo sapier  | 7.387328608 |
| High | Q8WU90 | Zinc finger CCCH domain-containing protein 15 OS=Homo     | 7.362540661 |
| High | Q2NKX8 | DNA excision repair protein ERCC-6-like OS=Homo sapien    | 7.352463182 |
| High | P14678 | Small nuclear ribonucleoprotein-associated proteins B and | 7.331119055 |
| High | P55196 | Afadin OS=Homo sapiens OX=9606 GN=AFDN PE=1 SV=3          | 7.308192137 |
| High | P24666 | Low molecular weight phosphotyrosine protein phosphat     | 7.30461535  |
| High | Q96HS1 | Serine/threonine-protein phosphatase PGAM5, mitochon      | 7.296441727 |
| High | A6NMY6 | Putative annexin A2-like protein OS=Homo sapiens OX=96    | 7.295568055 |
| High | P48556 | 26S proteasome non-ATPase regulatory subunit 8 OS=Ho      | 7.283278326 |
| High | Q9H7Z7 | Prostaglandin E synthase 2 OS=Homo sapiens OX=9606 G      | 7.270694655 |
| High | Q9UBB6 | Neurochondrin OS=Homo sapiens OX=9606 GN=NCDN PE          | 7.204618756 |
| High | Q9BTE3 | Mini-chromosome maintenance complex-binding protein       | 7.182526972 |
| High | P08134 | Rho-related GTP-binding protein RhoC OS=Homo sapiens      | 7.155022606 |
| High | Q96A65 | Exocyst complex component 4 OS=Homo sapiens OX=960        | 7.154000804 |
| High | P07910 | Heterogeneous nuclear ribonucleoproteins C1/C2 OS=Ho      | 7.152355349 |
| High | P49821 | NADH dehydrogenase [ubiquinone] flavoprotein 1, mitocl    | 7.114964612 |
| High | Q5VYK3 | Proteasome adapter and scaffold protein ECM29 OS=Hon      | 7.099630577 |
| High | Q96HY7 | Probable 2-oxoglutarate dehydrogenase E1 component D      | 7.064176449 |
| High | Q01650 | Large neutral amino acids transporter small subunit 1 OS= | 7.037725395 |
| High | Q9NYL9 | Tropomodulin-3 OS=Homo sapiens OX=9606 GN=TMOD3           | 6.981136799 |
| High | P62873 | Guanine nucleotide-binding protein G(I)/G(S)/G(T) subuni  | 6.97682236  |
| High | Q9ULX3 | RNA-binding protein NOB1 OS=Homo sapiens OX=9606 G        | 6.958507833 |
| High | P52907 | F-actin-capping protein subunit alpha-1 OS=Homo sapiens   | 6.957677066 |
| High | O14545 | TRAF-type zinc finger domain-containing protein 1 OS=Ho   | 6.907592736 |
| High | Q9BW27 | Nuclear pore complex protein Nup85 OS=Homo sapiens C      | 6.902766298 |
| High | Q14168 | MAGUK p55 subfamily member 2 OS=Homo sapiens OX=9         | 6.881919847 |
| High | P13995 | Bifunctional methylenetetrahydrofolate dehydrogenase/c    | 6.881559012 |
| High | Q32P28 | Prolyl 3-hydroxylase 1 OS=Homo sapiens OX=9606 GN=P3      | 6.863657148 |
| High | O95470 | Sphingosine-1-phosphate lyase 1 OS=Homo sapiens OX=9      | 6.861288089 |
| High | O14773 | Tripeptidyl-peptidase 1 OS=Homo sapiens OX=9606 GN=T      | 6.85304926  |
| High | Q9NZW5 | MAGUK p55 subfamily member 6 OS=Homo sapiens OX=9         | 6.852226301 |
| High | P08237 | ATP-dependent 6-phosphofructokinase, muscle type OS=I     | 6.849022268 |
| High | P55209 | Nucleosome assembly protein 1-like 1 OS=Homo sapiens      | 6.841892731 |

|      |        |                                                                       |             |
|------|--------|-----------------------------------------------------------------------|-------------|
| High | Q9UN86 | Ras GTPase-activating protein-binding protein 2 OS=Homo               | 6.828388789 |
| High | P34949 | Mannose-6-phosphate isomerase OS=Homo sapiens OX=9606 GN=EGLN         | 6.792634963 |
| High | Q9GZT9 | Egl nine homolog 1 OS=Homo sapiens OX=9606 GN=EGLN                    | 6.790753151 |
| High | Q9UJV9 | Probable ATP-dependent RNA helicase DDX41 OS=Homo                     | 6.785168016 |
| High | Q04726 | Transducin-like enhancer protein 3 OS=Homo sapiens OX=9606 GN=TE      | 6.782124367 |
| High | Q9Y3D9 | 28S ribosomal protein S23, mitochondrial OS=Homo sapiens              | 6.767288687 |
| High | P22570 | NADPH:adrenodoxin oxidoreductase, mitochondrial OS=Homo sapiens       | 6.765619505 |
| High | Q9NPI6 | mRNA-decapping enzyme 1A OS=Homo sapiens OX=9606 GN=DCP1              | 6.762456262 |
| High | Q9NUQ9 | Protein FAM49B OS=Homo sapiens OX=9606 GN=FAM49B                      | 6.749824052 |
| High | Q9POJ1 | [Pyruvate dehydrogenase [acetyl-transferring]]-phosphatase            | 6.746419686 |
| High | Q8IWS0 | PHD finger protein 6 OS=Homo sapiens OX=9606 GN=PHF1                  | 6.727714943 |
| High | Q15149 | Plectin OS=Homo sapiens OX=9606 GN=PLEC PE=1 SV=3                     | 6.69248674  |
| High | Q9UGI8 | Testin OS=Homo sapiens OX=9606 GN=TES PE=1 SV=1                       | 6.688677597 |
| High | P50914 | 60S ribosomal protein L14 OS=Homo sapiens OX=9606 GN=L14              | 6.684595823 |
| High | Q9HCN4 | GPN-loop GTPase 1 OS=Homo sapiens OX=9606 GN=GPN1                     | 6.57042354  |
| High | Q96JB5 | CDK5 regulatory subunit-associated protein 3 OS=Homo sapiens          | 6.560207671 |
| High | O43156 | TELO2-interacting protein 1 homolog OS=Homo sapiens OX=9606 GN=       | 6.553462833 |
| High | P46379 | Large proline-rich protein BAG6 OS=Homo sapiens OX=9606 GN=BAG6       | 6.55261238  |
| High | P62829 | 60S ribosomal protein L23 OS=Homo sapiens OX=9606 GN=L23              | 6.548520595 |
| High | Q9UEW8 | STE20/SPS1-related proline-alanine-rich protein kinase OS=Homo        | 6.547069028 |
| High | Q9NVI1 | Fanconi anemia group I protein OS=Homo sapiens OX=9606 GN=FAH1        | 6.532403732 |
| High | Q5H9R7 | Serine/threonine-protein phosphatase 6 regulatory subunit 1 OS=Homo   | 6.529227405 |
| High | Q9HB07 | UPF0160 protein MYG1, mitochondrial OS=Homo sapiens                   | 6.52667101  |
| High | O43823 | A-kinase anchor protein 8 OS=Homo sapiens OX=9606 GN=AKAP8            | 6.492763912 |
| High | O60547 | GDP-mannose 4,6 dehydratase OS=Homo sapiens OX=9606 GN=GM46           | 6.449234311 |
| High | Q9BQ39 | ATP-dependent RNA helicase DDX50 OS=Homo sapiens OX=9606 GN=          | 6.41930306  |
| High | P55884 | Eukaryotic translation initiation factor 3 subunit B OS=Homo sapiens  | 6.411739949 |
| High | Q9BSD7 | Cancer-related nucleoside-triphosphatase OS=Homo sapiens              | 6.410095014 |
| High | Q9UPN7 | Serine/threonine-protein phosphatase 6 regulatory subunit 1 OS=Homo   | 6.399276542 |
| High | P61225 | Ras-related protein Rap-2b OS=Homo sapiens OX=9606 GN=RAP2B           | 6.394118576 |
| High | P04908 | Histone H2A type 1-B/E OS=Homo sapiens OX=9606 GN=H2A                 | 6.393843212 |
| High | Q9Y2Z0 | Protein SGT1 homolog OS=Homo sapiens OX=9606 GN=SGT1                  | 6.357176717 |
| High | P27816 | Microtubule-associated protein 4 OS=Homo sapiens OX=9606 GN=MAP4      | 6.348280452 |
| High | Q8TB72 | Pumilio homolog 2 OS=Homo sapiens OX=9606 GN=PUM2                     | 6.339415975 |
| High | Q9Y5K5 | Ubiquitin carboxyl-terminal hydrolase isozyme L5 OS=Homo sapiens      | 6.331900726 |
| High | Q9Y2X9 | Zinc finger protein 281 OS=Homo sapiens OX=9606 GN=ZFP281             | 6.325381324 |
| High | Q15833 | Syntaxin-binding protein 2 OS=Homo sapiens OX=9606 GN=STXB2           | 6.314079208 |
| High | O95299 | NADH dehydrogenase [ubiquinone] 1 alpha subcomplex subunit 1 OS=Homo  | 6.281249265 |
| High | Q9UJX3 | Anaphase-promoting complex subunit 7 OS=Homo sapiens OX=9606 GN=      | 6.276919182 |
| High | Q15459 | Splicing factor 3A subunit 1 OS=Homo sapiens OX=9606 GN=SF3A1         | 6.270112687 |
| High | Q92888 | Rho guanine nucleotide exchange factor 1 OS=Homo sapiens OX=9606 GN=  | 6.264184007 |
| High | Q9Y2X3 | Nucleolar protein 58 OS=Homo sapiens OX=9606 GN=NO58                  | 6.262496781 |
| High | Q04917 | 14-3-3 protein eta OS=Homo sapiens OX=9606 GN=YWHA2                   | 6.25436153  |
| High | P26358 | DNA (cytosine-5)-methyltransferase 1 OS=Homo sapiens OX=9606 GN=DNMT1 | 6.247594885 |
| High | Q9Y4K3 | TNF receptor-associated factor 6 OS=Homo sapiens OX=9606 GN=TRAF6     | 6.220789568 |
| High | Q99729 | Heterogeneous nuclear ribonucleoprotein A/B OS=Homo sapiens           | 6.194729807 |
| High | P62753 | 40S ribosomal protein S6 OS=Homo sapiens OX=9606 GN=S6                | 6.187531039 |
| High | Q9BZE1 | 39S ribosomal protein L37, mitochondrial OS=Homo sapiens              | 6.181378274 |
| High | P60866 | 40S ribosomal protein S20 OS=Homo sapiens OX=9606 GN=S20              | 6.165169358 |
| High | Q96EK5 | KIF1-binding protein OS=Homo sapiens OX=9606 GN=KIF1B                 | 6.162032982 |

|      |        |                                                           |             |
|------|--------|-----------------------------------------------------------|-------------|
| High | Q07955 | Serine/arginine-rich splicing factor 1 OS=Homo sapiens O  | 6.146900481 |
| High | Q9Y490 | Talin-1 OS=Homo sapiens OX=9606 GN=TLN1 PE=1 SV=3         | 6.139808181 |
| High | Q9H9A6 | Leucine-rich repeat-containing protein 40 OS=Homo sapie   | 6.129249781 |
| High | P01023 | Alpha-2-macroglobulin OS=Homo sapiens OX=9606 GN=A        | 6.104254986 |
| High | P49790 | Nuclear pore complex protein Nup153 OS=Homo sapiens       | 6.092749917 |
| High | P62906 | 60S ribosomal protein L10a OS=Homo sapiens OX=9606 G      | 6.086892178 |
| High | Q12972 | Nuclear inhibitor of protein phosphatase 1 OS=Homo sapi   | 6.076186279 |
| High | Q9NRK6 | ATP-binding cassette sub-family B member 10, mitochonc    | 6.067729224 |
| High | P41214 | Eukaryotic translation initiation factor 2D OS=Homo sapie | 6.066330529 |
| High | Q53GS9 | U4/U6.U5 tri-snRNP-associated protein 2 OS=Homo sapie     | 6.048028713 |
| High | Q92889 | DNA repair endonuclease XPF OS=Homo sapiens OX=9606       | 6.046661764 |
| High | P62913 | 60S ribosomal protein L11 OS=Homo sapiens OX=9606 GN      | 6.029474235 |
| High | P48147 | Prolyl endopeptidase OS=Homo sapiens OX=9606 GN=PR        | 6.016779785 |
| High | Q9UNH7 | Sorting nexin-6 OS=Homo sapiens OX=9606 GN=SNX6 PE=       | 6.003533511 |
| High | O43396 | Thioredoxin-like protein 1 OS=Homo sapiens OX=9606 GN     | 5.987695049 |
| High | Q9UID3 | Vacuolar protein sorting-associated protein 51 homolog C  | 5.954677021 |
| High | P10586 | Receptor-type tyrosine-protein phosphatase F OS=Homo      | 5.919360347 |
| High | P42285 | Exosome RNA helicase MTR4 OS=Homo sapiens OX=9606         | 5.918985923 |
| High | P52747 | Zinc finger protein 143 OS=Homo sapiens OX=9606 GN=Z      | 5.901355635 |
| High | O75351 | Vacuolar protein sorting-associated protein 4B OS=Homo    | 5.894691252 |
| High | Q14683 | Structural maintenance of chromosomes protein 1A OS=H     | 5.890600325 |
| High | Q9BPU6 | Dihydropyrimidinase-related protein 5 OS=Homo sapiens     | 5.84314931  |
| High | P00374 | Dihydrofolate reductase OS=Homo sapiens OX=9606 GN=       | 5.820639634 |
| High | P25789 | Proteasome subunit alpha type-4 OS=Homo sapiens OX=9      | 5.813743674 |
| High | P14923 | Junction plakoglobin OS=Homo sapiens OX=9606 GN=JUP       | 5.796380396 |
| High | O43598 | 2'-deoxynucleoside 5'-phosphate N-hydrolase 1 OS=Homo     | 5.795880017 |
| High | Q9P210 | Cleavage and polyadenylation specificity factor subunit 2 | 5.793204768 |
| High | Q9Y2Z4 | Tyrosine--tRNA ligase, mitochondrial OS=Homo sapiens O    | 5.7931369   |
| High | Q9H3P2 | Negative elongation factor A OS=Homo sapiens OX=9606      | 5.787507271 |
| High | Q9Y4P1 | Cysteine protease ATG4B OS=Homo sapiens OX=9606 GN        | 5.779891912 |
| High | A0FGR8 | Extended synaptotagmin-2 OS=Homo sapiens OX=9606 G        | 5.772831889 |
| High | P62937 | Peptidyl-prolyl cis-trans isomerase A OS=Homo sapiens O   | 5.752254369 |
| High | Q3KQV9 | UDP-N-acetylhexosamine pyrophosphorylase-like protein     | 5.74875903  |
| High | P46779 | 60S ribosomal protein L28 OS=Homo sapiens OX=9606 GN      | 5.740227471 |
| High | Q9BTW9 | Tubulin-specific chaperone D OS=Homo sapiens OX=9606      | 5.739932764 |
| High | Q96H79 | Zinc finger CCCH-type antiviral protein 1-like OS=Homo sa | 5.726998728 |
| High | Q8IYI6 | Exocyst complex component 8 OS=Homo sapiens OX=960        | 5.716497414 |
| High | P51665 | 26S proteasome non-ATPase regulatory subunit 7 OS=Hoi     | 5.715343717 |
| High | Q99961 | Endophilin-A2 OS=Homo sapiens OX=9606 GN=SH3GL1 PI        | 5.694171534 |
| High | O00186 | Syntaxin-binding protein 3 OS=Homo sapiens OX=9606 GN     | 5.647651439 |
| High | Q12873 | Chromodomain-helicase-DNA-binding protein 3 OS=Homo       | 5.646660905 |
| High | P04004 | Vitronectin OS=Homo sapiens OX=9606 GN=VTN PE=1 SV        | 5.61852391  |
| High | Q96RS6 | NudC domain-containing protein 1 OS=Homo sapiens OX=      | 5.610125442 |
| High | O95793 | Double-stranded RNA-binding protein Staufen homolog 1     | 5.606055944 |
| High | Q9Y266 | Nuclear migration protein nudC OS=Homo sapiens OX=96      | 5.605327341 |
| High | Q69YN2 | CWF19-like protein 1 OS=Homo sapiens OX=9606 GN=CW        | 5.567678628 |
| High | Q6PJG6 | BRCA1-associated ATM activator 1 OS=Homo sapiens OX=      | 5.530177984 |
| High | Q15382 | GTP-binding protein Rheb OS=Homo sapiens OX=9606 GN       | 5.522734005 |
| High | Q8TEQ6 | Gem-associated protein 5 OS=Homo sapiens OX=9606 GN       | 5.517076133 |
| High | Q16543 | Hsp90 co-chaperone Cdc37 OS=Homo sapiens OX=9606 G        | 5.513980631 |

|      |        |                                                          |             |
|------|--------|----------------------------------------------------------|-------------|
| High | P48047 | ATP synthase subunit O, mitochondrial OS=Homo sapiens    | 5.487460588 |
| High | P35611 | Alpha-adducin OS=Homo sapiens OX=9606 GN=ADD1 PE=        | 5.480842938 |
| High | Q01518 | Adenylyl cyclase-associated protein 1 OS=Homo sapiens C  | 5.475474063 |
| High | Q9H2M9 | Rab3 GTPase-activating protein non-catalytic subunit OS= | 5.44547886  |
| High | O14979 | Heterogeneous nuclear ribonucleoprotein D-like OS=Hom    | 5.444375528 |
| High | Q9UBQ0 | Vacuolar protein sorting-associated protein 29 OS=Homo   | 5.443333207 |
| High | Q6PKG0 | La-related protein 1 OS=Homo sapiens OX=9606 GN=LARI     | 5.44333041  |
| High | O60231 | Pre-mRNA-splicing factor ATP-dependent RNA helicase Dh   | 5.442036247 |
| High | Q9BQG0 | Myb-binding protein 1A OS=Homo sapiens OX=9606 GN=       | 5.429573822 |
| High | P09211 | Glutathione S-transferase P OS=Homo sapiens OX=9606 C    | 5.423496206 |
| High | Q05048 | Cleavage stimulation factor subunit 1 OS=Homo sapiens C  | 5.370794343 |
| High | P30520 | Adenylosuccinate synthetase isozyme 2 OS=Homo sapien     | 5.361443657 |
| High | Q16836 | Hydroxyacyl-coenzyme A dehydrogenase, mitochondrial C    | 5.356631624 |
| High | Q14181 | DNA polymerase alpha subunit B OS=Homo sapiens OX=9      | 5.336864685 |
| High | P60174 | Triosephosphate isomerase OS=Homo sapiens OX=9606 C      | 5.334533986 |
| High | Q9Y4X5 | E3 ubiquitin-protein ligase ARIH1 OS=Homo sapiens OX=9   | 5.330845894 |
| High | Q02252 | Methylmalonate-semialdehyde dehydrogenase [acylating     | 5.310189949 |
| High | Q9BSJ2 | Gamma-tubulin complex component 2 OS=Homo sapiens        | 5.290628263 |
| High | O14880 | Microsomal glutathione S-transferase 3 OS=Homo sapien    | 5.264880366 |
| High | Q6PHR2 | Serine/threonine-protein kinase ULK3 OS=Homo sapiens C   | 5.264081883 |
| High | P13667 | Protein disulfide-isomerase A4 OS=Homo sapiens OX=960    | 5.251429365 |
| High | Q96HE7 | ERO1-like protein alpha OS=Homo sapiens OX=9606 GN=f     | 5.231952704 |
| High | Q6IN85 | Serine/threonine-protein phosphatase 4 regulatory subur  | 5.204969111 |
| High | P25490 | Transcriptional repressor protein YY1 OS=Homo sapiens C  | 5.200766314 |
| High | P41240 | Tyrosine-protein kinase CSK OS=Homo sapiens OX=9606 C    | 5.198904806 |
| High | P39019 | 40S ribosomal protein S19 OS=Homo sapiens OX=9606 Gf     | 5.197995691 |
| High | O75396 | Vesicle-trafficking protein SEC22b OS=Homo sapiens OX=9  | 5.192667961 |
| High | Q15738 | Sterol-4-alpha-carboxylate 3-dehydrogenase, decarboxyla  | 5.183322304 |
| High | Q9ULT8 | E3 ubiquitin-protein ligase HECTD1 OS=Homo sapiens OX=   | 5.172574505 |
| High | O60762 | Dolichol-phosphate mannosyltransferase subunit 1 OS=Ho   | 5.168770306 |
| High | Q96CW5 | Gamma-tubulin complex component 3 OS=Homo sapiens        | 5.168383265 |
| High | P43490 | Nicotinamide phosphoribosyltransferase OS=Homo sapie     | 5.163347048 |
| High | P28074 | Proteasome subunit beta type-5 OS=Homo sapiens OX=96     | 5.147947191 |
| High | P52434 | DNA-directed RNA polymerases I, II, and III subunit RPAB | 5.110754339 |
| High | Q92990 | Glomulin OS=Homo sapiens OX=9606 GN=GLMN PE=1 SV         | 5.069879821 |
| High | Q9Y2J2 | Band 4.1-like protein 3 OS=Homo sapiens OX=9606 GN=E     | 5.059184791 |
| High | Q15785 | Mitochondrial import receptor subunit TOM34 OS=Homo      | 5.024247575 |
| High | O60502 | Protein O-GlcNAcase OS=Homo sapiens OX=9606 GN=OG        | 5.024052105 |
| High | P51571 | Translocon-associated protein subunit delta OS=Homo sa   | 5.016013078 |
| High | Q9H4I3 | TraB domain-containing protein OS=Homo sapiens OX=96     | 4.983402427 |
| High | Q9NRG7 | Epimerase family protein SDR39U1 OS=Homo sapiens OX=     | 4.957424488 |
| High | P50897 | Palmitoyl-protein thioesterase 1 OS=Homo sapiens OX=96   | 4.956637722 |
| High | Q9UBT2 | SUMO-activating enzyme subunit 2 OS=Homo sapiens OX      | 4.937646315 |
| High | P11766 | Alcohol dehydrogenase class-3 OS=Homo sapiens OX=960     | 4.93674172  |
| High | Q9Y263 | Phospholipase A-2-activating protein OS=Homo sapiens C   | 4.936666641 |
| High | P42345 | Serine/threonine-protein kinase mTOR OS=Homo sapiens     | 4.926933709 |
| High | Q13228 | Methanethiol oxidase OS=Homo sapiens OX=9606 GN=SE       | 4.919012953 |
| High | Q12996 | Cleavage stimulation factor subunit 3 OS=Homo sapiens C  | 4.913996294 |
| High | Q13416 | Origin recognition complex subunit 2 OS=Homo sapiens C   | 4.890759031 |
| High | Q5VUJ6 | Leucine-rich repeat and calponin homology domain-conta   | 4.884416445 |

|      |        |                                                         |             |
|------|--------|---------------------------------------------------------|-------------|
| High | P10253 | Lysosomal alpha-glucosidase OS=Homo sapiens OX=9606     | 4.851089007 |
| High | O75844 | CAAX prenyl protease 1 homolog OS=Homo sapiens OX=9     | 4.848936747 |
| High | P43897 | Elongation factor Ts, mitochondrial OS=Homo sapiens OX  | 4.84863015  |
| High | Q9Y223 | Bifunctional UDP-N-acetylglucosamine 2-epimerase/N-ac   | 4.848114023 |
| High | Q9NZJ7 | Mitochondrial carrier homolog 1 OS=Homo sapiens OX=9    | 4.844196543 |
| High | Q15126 | Phosphomevalonate kinase OS=Homo sapiens OX=9606 G      | 4.831502516 |
| High | P40938 | Replication factor C subunit 3 OS=Homo sapiens OX=9606  | 4.830033235 |
| High | Q7Z4Q2 | HEAT repeat-containing protein 3 OS=Homo sapiens OX=9   | 4.82303264  |
| High | Q8NCA5 | Protein FAM98A OS=Homo sapiens OX=9606 GN=FAM98A        | 4.819014419 |
| High | P61353 | 60S ribosomal protein L27 OS=Homo sapiens OX=9606 GN    | 4.8015965   |
| High | Q96S44 | EKC/KEOPS complex subunit TP53RK OS=Homo sapiens O      | 4.78994915  |
| High | O14976 | Cyclin-G-associated kinase OS=Homo sapiens OX=9606 GN   | 4.770830297 |
| High | P06753 | Tropomyosin alpha-3 chain OS=Homo sapiens OX=9606 GN    | 4.747195836 |
| High | P58004 | Sestrin-2 OS=Homo sapiens OX=9606 GN=SESN2 PE=1 SV=     | 4.744004273 |
| High | Q9UBS4 | DnaJ homolog subfamily B member 11 OS=Homo sapiens      | 4.738975166 |
| High | Q9Y6D9 | Mitotic spindle assembly checkpoint protein MAD1 OS=H   | 4.738023809 |
| High | P51648 | Fatty aldehyde dehydrogenase OS=Homo sapiens OX=9606    | 4.735182177 |
| High | Q9BY32 | Inosine triphosphate pyrophosphatase OS=Homo sapiens    | 4.727428371 |
| High | Q9UNL2 | Translocon-associated protein subunit gamma OS=Homo     | 4.670195478 |
| High | P16118 | 6-phosphofructo-2-kinase/fructose-2,6-bisphosphatase 1  | 4.622151948 |
| High | Q6DD88 | Atlastin-3 OS=Homo sapiens OX=9606 GN=ATL3 PE=1 SV=     | 4.617652731 |
| High | Q8WWY3 | U4/U6 small nuclear ribonucleoprotein Prp31 OS=Homo s   | 4.605722072 |
| High | Q9Y4P3 | Transducin beta-like protein 2 OS=Homo sapiens OX=9606  | 4.601712695 |
| High | P62280 | 40S ribosomal protein S11 OS=Homo sapiens OX=9606 GN    | 4.593951276 |
| High | Q9NVM4 | Protein arginine N-methyltransferase 7 OS=Homo sapiens  | 4.571757391 |
| High | Q16186 | Proteasomal ubiquitin receptor ADRM1 OS=Homo sapien     | 4.53521248  |
| High | P11802 | Cyclin-dependent kinase 4 OS=Homo sapiens OX=9606 GN    | 4.527327786 |
| High | P12694 | 2-oxoisovalerate dehydrogenase subunit alpha, mitochon  | 4.527243551 |
| High | P49589 | Cysteine--tRNA ligase, cytoplasmic OS=Homo sapiens OX=  | 4.522296747 |
| High | P49841 | Glycogen synthase kinase-3 beta OS=Homo sapiens OX=9    | 4.511449283 |
| High | Q9NX58 | Cell growth-regulating nucleolar protein OS=Homo sapien | 4.506402551 |
| High | Q15208 | Serine/threonine-protein kinase 38 OS=Homo sapiens OX   | 4.500312917 |
| High | Q15797 | Mothers against decapentaplegic homolog 1 OS=Homo sa    | 4.490797478 |
| High | Q14997 | Proteasome activator complex subunit 4 OS=Homo sapie    | 4.488347665 |
| High | Q9HC07 | Transmembrane protein 165 OS=Homo sapiens OX=9606       | 4.472112434 |
| High | Q9Y2W6 | Tudor and KH domain-containing protein OS=Homo sapie    | 4.469544156 |
| High | Q9NWX8 | BRISC and BRCA1-A complex member 1 OS=Homo sapien       | 4.460171442 |
| High | P22087 | rRNA 2'-O-methyltransferase fibrillarin OS=Homo sapiens | 4.452225295 |
| High | P43304 | Glycerol-3-phosphate dehydrogenase, mitochondrial OS=   | 4.439481128 |
| High | Q9Y512 | Sorting and assembly machinery component 50 homolog     | 4.434932724 |
| High | Q8IWF6 | Protein DENND6A OS=Homo sapiens OX=9606 GN=DENN         | 4.430041182 |
| High | P01859 | Immunoglobulin heavy constant gamma 2 OS=Homo sapi      | 4.422197067 |
| High | Q86UK7 | E3 ubiquitin-protein ligase ZNF598 OS=Homo sapiens OX=  | 4.421246216 |
| High | Q9BZE4 | Nucleolar GTP-binding protein 1 OS=Homo sapiens OX=96   | 4.416008201 |
| High | P08574 | Cytochrome c1, heme protein, mitochondrial OS=Homo s    | 4.406824737 |
| High | P14324 | Farnesyl pyrophosphate synthase OS=Homo sapiens OX=9    | 4.406742207 |
| High | Q8NHH9 | Atlastin-2 OS=Homo sapiens OX=9606 GN=ATL2 PE=1 SV=     | 4.3982539   |
| High | Q15691 | Microtubule-associated protein RP/EB family member 1 C  | 4.385282104 |
| High | O95163 | Elongator complex protein 1 OS=Homo sapiens OX=9606     | 4.382365989 |
| High | P50750 | Cyclin-dependent kinase 9 OS=Homo sapiens OX=9606 GN    | 4.380995208 |

|      |        |                                                             |             |
|------|--------|-------------------------------------------------------------|-------------|
| High | Q9GZT4 | Serine racemase OS=Homo sapiens OX=9606 GN=SRR PE=          | 4.37788964  |
| High | Q08257 | Quinone oxidoreductase OS=Homo sapiens OX=9606 GN=          | 4.3400838   |
| High | Q13418 | Integrin-linked protein kinase OS=Homo sapiens OX=9606      | 4.337594246 |
| High | O15260 | Surfeit locus protein 4 OS=Homo sapiens OX=9606 GN=SL       | 4.328086988 |
| High | P13473 | Lysosome-associated membrane glycoprotein 2 OS=Homo         | 4.321481621 |
| High | Q8N6T3 | ADP-ribosylation factor GTPase-activating protein 1 OS=H    | 4.314885531 |
| High | P08758 | Annexin A5 OS=Homo sapiens OX=9606 GN=ANXA5 PE=1            | 4.313790013 |
| High | P62070 | Ras-related protein R-Ras2 OS=Homo sapiens OX=9606 G        | 4.306976932 |
| High | Q8N680 | Zinc finger and BTB domain-containing protein 2 OS=Hom      | 4.304956341 |
| High | Q14669 | E3 ubiquitin-protein ligase TRIP12 OS=Homo sapiens OX=      | 4.275069086 |
| High | P02771 | Alpha-fetoprotein OS=Homo sapiens OX=9606 GN=AFP PE         | 4.266241164 |
| High | Q96EP5 | DAZ-associated protein 1 OS=Homo sapiens OX=9606 GN=        | 4.240785569 |
| High | Q9BQ95 | Evolutionarily conserved signaling intermediate in Toll pat | 4.236497135 |
| High | P51003 | Poly(A) polymerase alpha OS=Homo sapiens OX=9606 GN         | 4.211266141 |
| High | Q8WYA6 | Beta-catenin-like protein 1 OS=Homo sapiens OX=9606 G       | 4.211226585 |
| High | Q96TA2 | ATP-dependent zinc metalloprotease YME1L1 OS=Homo s         | 4.206558867 |
| High | Q9BYD3 | 39S ribosomal protein L4, mitochondrial OS=Homo sapier      | 4.190238335 |
| High | Q68EM7 | Rho GTPase-activating protein 17 OS=Homo sapiens OX=        | 4.160333443 |
| High | Q13724 | Mannosyl-oligosaccharide glucosidase OS=Homo sapiens        | 4.151687696 |
| High | P06396 | Gelsolin OS=Homo sapiens OX=9606 GN=GSN PE=1 SV=1           | 4.146971385 |
| High | Q14746 | Conserved oligomeric Golgi complex subunit 2 OS=Homo        | 4.146362618 |
| High | P47914 | 60S ribosomal protein L29 OS=Homo sapiens OX=9606 GN        | 4.113137971 |
| High | Q9NY33 | Dipeptidyl peptidase 3 OS=Homo sapiens OX=9606 GN=D         | 4.092749917 |
| High | Q96S55 | ATPase WRNIP1 OS=Homo sapiens OX=9606 GN=WRNIP1             | 4.07473949  |
| High | Q13435 | Splicing factor 3B subunit 2 OS=Homo sapiens OX=9606 G      | 4.061130178 |
| High | P51151 | Ras-related protein Rab-9A OS=Homo sapiens OX=9606 G        | 4.050317309 |
| High | O75794 | Cell division cycle protein 123 homolog OS=Homo sapiens     | 4.048714804 |
| High | Q9NRZ9 | Lymphoid-specific helicase OS=Homo sapiens OX=9606 G        | 4.021084681 |
| High | Q6P1Q9 | Methyltransferase-like protein 2B OS=Homo sapiens OX=       | 3.981715692 |
| High | Q96EE3 | Nucleoporin SEH1 OS=Homo sapiens OX=9606 GN=SEH1L           | 3.952452372 |
| High | Q6YHU6 | Thyroid adenoma-associated protein OS=Homo sapiens C        | 3.950394387 |
| High | P27361 | Mitogen-activated protein kinase 3 OS=Homo sapiens OX       | 3.940417992 |
| High | P35268 | 60S ribosomal protein L22 OS=Homo sapiens OX=9606 GN        | 3.934793872 |
| High | P00492 | Hypoxanthine-guanine phosphoribosyltransferase OS=Ho        | 3.926751015 |
| High | Q9Y316 | Protein MEMO1 OS=Homo sapiens OX=9606 GN=MEMO1              | 3.925549281 |
| High | P28072 | Proteasome subunit beta type-6 OS=Homo sapiens OX=96        | 3.917573699 |
| High | Q8NG31 | Kinetochores scaffold 1 OS=Homo sapiens OX=9606 GN=K        | 3.914352712 |
| High | Q9BU14 | DNA-directed RNA polymerase III subunit RPC3 OS=Homo        | 3.912218582 |
| High | Q99661 | Kinesin-like protein KIF2C OS=Homo sapiens OX=9606 GN       | 3.912218582 |
| High | O43929 | Origin recognition complex subunit 4 OS=Homo sapiens C      | 3.91150953  |
| High | Q9UBB9 | Tuftelin-interacting protein 11 OS=Homo sapiens OX=960      | 3.909741947 |
| High | Q7Z5L9 | Interferon regulatory factor 2-binding protein 2 OS=Homo    | 3.906228219 |
| High | Q13131 | 5'-AMP-activated protein kinase catalytic subunit alpha-1   | 3.88008459  |
| High | Q16740 | ATP-dependent Clp protease proteolytic subunit, mitochc     | 3.878768545 |
| High | P46736 | Lys-63-specific deubiquitinase BRCC36 OS=Homo sapiens       | 3.875133623 |
| High | Q9GZZ1 | N-alpha-acetyltransferase 50 OS=Homo sapiens OX=9606        | 3.87484417  |
| High | P68431 | Histone H3.1 OS=Homo sapiens OX=9606 GN=HIST1H3A F          | 3.861955112 |
| High | Q9UPT9 | Ubiquitin carboxyl-terminal hydrolase 22 OS=Homo sapie      | 3.838033384 |
| High | P63241 | Eukaryotic translation initiation factor 5A-1 OS=Homo sap   | 3.829505413 |
| High | P31146 | Coronin-1A OS=Homo sapiens OX=9606 GN=CORO1A PE=            | 3.828566099 |

|      |        |                                                                                             |             |
|------|--------|---------------------------------------------------------------------------------------------|-------------|
| High | Q8TC07 | TBC1 domain family member 15 OS=Homo sapiens OX=9606 GN=                                    | 3.825415051 |
| High | A4D1P6 | WD repeat-containing protein 91 OS=Homo sapiens OX=9606 GN=                                 | 3.814741235 |
| High | Q13362 | Serine/threonine-protein phosphatase 2A 56 kDa regulator OS=Homo sapiens OX=9606 GN=        | 3.809948582 |
| High | P53582 | Methionine aminopeptidase 1 OS=Homo sapiens OX=9606 GN=                                     | 3.809411444 |
| High | P41743 | Protein kinase C iota type OS=Homo sapiens OX=9606 GN=                                      | 3.802443787 |
| High | Q96AG4 | Leucine-rich repeat-containing protein 59 OS=Homo sapiens OX=9606 GN=                       | 3.800793521 |
| High | Q4KMP7 | TBC1 domain family member 10B OS=Homo sapiens OX=9606 GN=                                   | 3.800519085 |
| High | O94966 | Ubiquitin carboxyl-terminal hydrolase 19 OS=Homo sapiens OX=9606 GN=                        | 3.794254459 |
| High | Q96T88 | E3 ubiquitin-protein ligase UHRF1 OS=Homo sapiens OX=9606 GN=                               | 3.790484985 |
| High | P07741 | Adenine phosphoribosyltransferase OS=Homo sapiens OX=9606 GN=                               | 3.780153614 |
| High | Q8WUX9 | Charged multivesicular body protein 7 OS=Homo sapiens OX=9606 GN=                           | 3.775892869 |
| High | Q9Y2I8 | WD repeat-containing protein 37 OS=Homo sapiens OX=9606 GN=                                 | 3.775466937 |
| High | P61009 | Signal peptidase complex subunit 3 OS=Homo sapiens OX=9606 GN=                              | 3.744486287 |
| High | O75688 | Protein phosphatase 1B OS=Homo sapiens OX=9606 GN=                                          | 3.743282254 |
| High | P54709 | Sodium/potassium-transporting ATPase subunit beta-3 OS=Homo sapiens OX=9606 GN=             | 3.73072061  |
| High | Q01085 | Nucleolysin TIAR OS=Homo sapiens OX=9606 GN=TIAL1 P                                         | 3.730253627 |
| High | Q8NBX0 | Saccharopine dehydrogenase-like oxidoreductase OS=Homo sapiens OX=9606 GN=                  | 3.729321164 |
| High | Q5JWF2 | Guanine nucleotide-binding protein G(s) subunit alpha isoform 1 OS=Homo sapiens OX=9606 GN= | 3.723308471 |
| High | Q16629 | Serine/arginine-rich splicing factor 7 OS=Homo sapiens OX=9606 GN=                          | 3.721475035 |
| High | Q8WUK0 | Phosphatidylglycerophosphatase and protein-tyrosine phosphatase OS=Homo sapiens OX=9606 GN= | 3.712422191 |
| High | O94973 | AP-2 complex subunit alpha-2 OS=Homo sapiens OX=9606 GN=                                    | 3.705313376 |
| High | P13693 | Translationally-controlled tumor protein OS=Homo sapiens OX=9606 GN=                        | 3.703801818 |
| High | O00264 | Membrane-associated progesterone receptor component 1 OS=Homo sapiens OX=9606 GN=           | 3.7000571   |
| High | Q9POJ0 | NADH dehydrogenase [ubiquinone] 1 alpha subcomplex subunit 1 OS=Homo sapiens OX=9606 GN=    | 3.699404516 |
| High | P46776 | 60S ribosomal protein L27a OS=Homo sapiens OX=9606 GN=                                      | 3.696156225 |
| High | P50579 | Methionine aminopeptidase 2 OS=Homo sapiens OX=9606 GN=                                     | 3.684029655 |
| High | P10398 | Serine/threonine-protein kinase A-Raf OS=Homo sapiens OX=9606 GN=                           | 3.67943832  |
| High | Q13685 | Angio-associated migratory cell protein OS=Homo sapiens OX=9606 GN=                         | 3.672441847 |
| High | Q16850 | Lanosterol 14-alpha demethylase OS=Homo sapiens OX=9606 GN=                                 | 3.661543506 |
| High | O14579 | Coatomer subunit epsilon OS=Homo sapiens OX=9606 GN=                                        | 3.655411257 |
| High | P17152 | Transmembrane protein 11, mitochondrial OS=Homo sapiens OX=9606 GN=                         | 3.642827742 |
| High | Q7Z6Z7 | E3 ubiquitin-protein ligase HUWE1 OS=Homo sapiens OX=9606 GN=                               | 3.633203617 |
| High | Q16762 | Thiosulfate sulfurtransferase OS=Homo sapiens OX=9606 GN=                                   | 3.631903614 |
| High | P36915 | Guanine nucleotide-binding protein-like 1 OS=Homo sapiens OX=9606 GN=                       | 3.629116983 |
| High | Q9BQ70 | Transcription factor 25 OS=Homo sapiens OX=9606 GN=T                                        | 3.624702262 |
| High | P28482 | Mitogen-activated protein kinase 1 OS=Homo sapiens OX=9606 GN=                              | 3.61960784  |
| High | P29966 | Myristoylated alanine-rich C-kinase substrate OS=Homo sapiens OX=9606 GN=                   | 3.606951534 |
| High | Q7KZI7 | Serine/threonine-protein kinase MARK2 OS=Homo sapiens OX=9606 GN=                           | 3.604848408 |
| High | Q96JH7 | Deubiquitinating protein VCIP135 OS=Homo sapiens OX=9606 GN=                                | 3.600394266 |
| High | Q9H0D6 | 5'-3' exoribonuclease 2 OS=Homo sapiens OX=9606 GN=X                                        | 3.587371479 |
| High | Q9UBD5 | Origin recognition complex subunit 3 OS=Homo sapiens OX=9606 GN=                            | 3.582528307 |
| High | Q15637 | Splicing factor 1 OS=Homo sapiens OX=9606 GN=SF1 PE=1 SV=1                                  | 3.558147824 |
| High | O75153 | Clustered mitochondria protein homolog OS=Homo sapiens OX=9606 GN=                          | 3.54041544  |
| High | Q86UV5 | Ubiquitin carboxyl-terminal hydrolase 48 OS=Homo sapiens OX=9606 GN=                        | 3.540004744 |
| High | O00273 | DNA fragmentation factor subunit alpha OS=Homo sapiens OX=9606 GN=                          | 3.538201442 |
| High | Q13642 | Four and a half LIM domains protein 1 OS=Homo sapiens OX=9606 GN=                           | 3.537152964 |
| High | Q6RW13 | Type-1 angiotensin II receptor-associated protein OS=Homo sapiens OX=9606 GN=               | 3.529589509 |
| High | O00159 | Unconventional myosin-Ic OS=Homo sapiens OX=9606 GN=                                        | 3.505681324 |
| High | Q9H3N1 | Thioredoxin-related transmembrane protein 1 OS=Homo sapiens OX=9606 GN=                     | 3.501000636 |
| High | O15397 | Importin-8 OS=Homo sapiens OX=9606 GN=IPO8 PE=1 SV=1                                        | 3.500863005 |

|      |        |                                                                                          |             |
|------|--------|------------------------------------------------------------------------------------------|-------------|
| High | Q86YP4 | Transcriptional repressor p66-alpha OS=Homo sapiens OX=9606 GN=                          | 3.496481687 |
| High | Q02241 | Kinesin-like protein KIF23 OS=Homo sapiens OX=9606 GN=                                   | 3.496073196 |
| High | Q96C19 | EF-hand domain-containing protein D2 OS=Homo sapiens OX=9606 GN=                         | 3.482084614 |
| High | Q96C36 | Pyrroline-5-carboxylate reductase 2 OS=Homo sapiens OX=9606 GN=                          | 3.465973894 |
| High | O15091 | Mitochondrial ribonuclease P catalytic subunit OS=Homo sapiens OX=9606 GN=               | 3.465466244 |
| High | Q9NR50 | Translation initiation factor eIF-2B subunit gamma OS=Homo sapiens OX=9606 GN=           | 3.458795309 |
| High | Q14157 | Ubiquitin-associated protein 2-like OS=Homo sapiens OX=9606 GN=                          | 3.458420756 |
| High | Q8WVB6 | Chromosome transmission fidelity protein 18 homolog OS=Homo sapiens OX=9606 GN=          | 3.438064237 |
| High | Q969N2 | GPI transamidase component PIG-T OS=Homo sapiens OX=9606 GN=                             | 3.431816141 |
| High | Q00536 | Cyclin-dependent kinase 16 OS=Homo sapiens OX=9606 GN=                                   | 3.428773934 |
| High | Q92504 | Zinc transporter SLC39A7 OS=Homo sapiens OX=9606 GN=                                     | 3.427593132 |
| High | Q6NUM9 | All-trans-retinol 13,14-reductase OS=Homo sapiens OX=9606 GN=                            | 3.379863945 |
| High | O43719 | HIV Tat-specific factor 1 OS=Homo sapiens OX=9606 GN=                                    | 3.377371574 |
| High | O00411 | DNA-directed RNA polymerase, mitochondrial OS=Homo sapiens OX=9606 GN=                   | 3.372839048 |
| High | Q9BYB4 | Guanine nucleotide-binding protein subunit beta-like protein OS=Homo sapiens OX=9606 GN= | 3.364350408 |
| High | Q5JTH9 | RRP12-like protein OS=Homo sapiens OX=9606 GN=RRP12                                      | 3.352030542 |
| High | Q969S3 | Zinc finger protein 622 OS=Homo sapiens OX=9606 GN=ZFP622                                | 3.351347305 |
| High | Q5RKV6 | Exosome complex component MTR3 OS=Homo sapiens OX=9606 GN=                               | 3.324313291 |
| High | Q6P3W7 | SCY1-like protein 2 OS=Homo sapiens OX=9606 GN=SCYL2                                     | 3.321754848 |
| High | Q96PZ0 | Pseudouridylate synthase 7 homolog OS=Homo sapiens OX=9606 GN=                           | 3.317945223 |
| High | Q6P9B9 | Integrator complex subunit 5 OS=Homo sapiens OX=9606 GN=                                 | 3.314462652 |
| High | P61081 | NEDD8-conjugating enzyme Ubc12 OS=Homo sapiens OX=9606 GN=                               | 3.309006968 |
| High | Q8IYS1 | Peptidase M20 domain-containing protein 2 OS=Homo sapiens OX=9606 GN=                    | 3.289199983 |
| High | O15372 | Eukaryotic translation initiation factor 3 subunit H OS=Homo sapiens OX=9606 GN=         | 3.263683192 |
| High | Q96EY1 | DnaJ homolog subfamily A member 3, mitochondrial OS=Homo sapiens OX=9606 GN=             | 3.255550543 |
| High | Q0VDF9 | Heat shock 70 kDa protein 14 OS=Homo sapiens OX=9606 GN=                                 | 3.247875308 |
| High | Q9UKG1 | DCC-interacting protein 13-alpha OS=Homo sapiens OX=9606 GN=                             | 3.233446476 |
| High | Q15363 | Transmembrane emp24 domain-containing protein 2 OS=Homo sapiens OX=9606 GN=              | 3.229147988 |
| High | O15160 | DNA-directed RNA polymerases I and III subunit RPAC1 OS=Homo sapiens OX=9606 GN=         | 3.22848601  |
| High | P49761 | Dual specificity protein kinase CLK3 OS=Homo sapiens OX=9606 GN=                         | 3.220547817 |
| High | Q9NZB2 | Constitutive coactivator of PPAR-gamma-like protein 1 OS=Homo sapiens OX=9606 GN=        | 3.181048688 |
| High | Q9NZ01 | Very-long-chain enoyl-CoA reductase OS=Homo sapiens OX=9606 GN=                          | 3.176395372 |
| High | P68402 | Platelet-activating factor acetylhydrolase IB subunit beta OS=Homo sapiens OX=9606 GN=   | 3.166852888 |
| High | Q9UGV2 | Protein NDRG3 OS=Homo sapiens OX=9606 GN=NDRG3                                           | 3.157952711 |
| High | Q8N8S7 | Protein enabled homolog OS=Homo sapiens OX=9606 GN=                                      | 3.143210711 |
| High | Q9NYJ8 | TGF-beta-activated kinase 1 and MAP3K7-binding protein OS=Homo sapiens OX=9606 GN=       | 3.143150321 |
| High | P49792 | E3 SUMO-protein ligase RanBP2 OS=Homo sapiens OX=9606 GN=                                | 3.13768969  |
| High | P29218 | Inositol monophosphatase 1 OS=Homo sapiens OX=9606 GN=                                   | 3.137272472 |
| High | P04792 | Heat shock protein beta-1 OS=Homo sapiens OX=9606 GN=                                    | 3.129830279 |
| High | P85037 | Forkhead box protein K1 OS=Homo sapiens OX=9606 GN=                                      | 3.126600337 |
| High | O95861 | 3'(2'),5'-bisphosphate nucleotidase 1 OS=Homo sapiens OX=9606 GN=                        | 3.118558278 |
| High | Q96SI9 | Spermatid perinuclear RNA-binding protein OS=Homo sapiens OX=9606 GN=                    | 3.109355464 |
| High | Q9Y4R8 | Telomere length regulation protein TEL2 homolog OS=Homo sapiens OX=9606 GN=              | 3.107627093 |
| High | Q6Y7W6 | GRB10-interacting GYF protein 2 OS=Homo sapiens OX=9606 GN=                              | 3.107515821 |
| High | O43148 | mRNA cap guanine-N7 methyltransferase OS=Homo sapiens OX=9606 GN=                        | 3.089108911 |
| High | P21127 | Cyclin-dependent kinase 11B OS=Homo sapiens OX=9606 GN=                                  | 3.085941264 |
| High | Q6PCE3 | Glucose 1,6-bisphosphate synthase OS=Homo sapiens OX=9606 GN=                            | 3.082736124 |
| High | Q6IA86 | Elongator complex protein 2 OS=Homo sapiens OX=9606 GN=                                  | 3.08055579  |
| High | O75312 | Zinc finger protein ZPR1 OS=Homo sapiens OX=9606 GN=                                     | 3.079720105 |
| High | Q6UXN9 | WD repeat-containing protein 82 OS=Homo sapiens OX=9606 GN=                              | 3.066512712 |

|      |        |                                                          |             |
|------|--------|----------------------------------------------------------|-------------|
| High | Q9HCU5 | Prolactin regulatory element-binding protein OS=Homo sa  | 3.066259701 |
| High | P61201 | COP9 signalosome complex subunit 2 OS=Homo sapiens C     | 3.055475677 |
| High | Q96F07 | Cytoplasmic FMR1-interacting protein 2 OS=Homo sapien    | 3.051684859 |
| High | Q3ZCQ8 | Mitochondrial import inner membrane translocase subun    | 3.039101323 |
| High | Q27J81 | Inverted formin-2 OS=Homo sapiens OX=9606 GN=INF2 P      | 3.037962313 |
| High | Q9Y6M9 | NADH dehydrogenase [ubiquinone] 1 beta subcomplex su     | 3.037015416 |
| High | Q9Y2H1 | Serine/threonine-protein kinase 38-like OS=Homo sapiens  | 3.035598929 |
| High | P23443 | Ribosomal protein S6 kinase beta-1 OS=Homo sapiens OX    | 3.027334408 |
| High | Q9Y639 | Neuroplastin OS=Homo sapiens OX=9606 GN=NPTN PE=1        | 3.023100049 |
| High | P51553 | Isocitrate dehydrogenase [NAD] subunit gamma, mitoch     | 3.02017857  |
| High | Q14847 | LIM and SH3 domain protein 1 OS=Homo sapiens OX=960      | 3.019723859 |
| High | Q9UJU6 | Drebrin-like protein OS=Homo sapiens OX=9606 GN=DBN      | 3.014528617 |
| High | Q96GM8 | Target of EGR1 protein 1 OS=Homo sapiens OX=9606 GN=     | 2.995248844 |
| High | P30048 | Thioredoxin-dependent peroxide reductase, mitochondria   | 2.990124366 |
| High | Q5VV42 | Threonylcarbamoyladenosine tRNA methylthiotransferase    | 2.982132281 |
| High | P62266 | 40S ribosomal protein S23 OS=Homo sapiens OX=9606 GN     | 2.98088371  |
| High | P42766 | 60S ribosomal protein L35 OS=Homo sapiens OX=9606 GN     | 2.970616222 |
| High | O76021 | Ribosomal L1 domain-containing protein 1 OS=Homo sapi    | 2.970055046 |
| High | Q8N122 | Regulatory-associated protein of mTOR OS=Homo sapiens    | 2.963371105 |
| High | Q13573 | SNW domain-containing protein 1 OS=Homo sapiens OX=      | 2.957424488 |
| High | O00629 | Importin subunit alpha-3 OS=Homo sapiens OX=9606 GN=     | 2.955134092 |
| High | P00918 | Carbonic anhydrase 2 OS=Homo sapiens OX=9606 GN=CA       | 2.938924676 |
| High | Q00796 | Sorbitol dehydrogenase OS=Homo sapiens OX=9606 GN=       | 2.936762069 |
| High | Q86X55 | Histone-arginine methyltransferase CARM1 OS=Homo sap     | 2.924453039 |
| High | P00846 | ATP synthase subunit a OS=Homo sapiens OX=9606 GN=M      | 2.923359556 |
| High | O60331 | Phosphatidylinositol 4-phosphate 5-kinase type-1 gamma   | 2.916855857 |
| High | Q9BZX2 | Uridine-cytidine kinase 2 OS=Homo sapiens OX=9606 GN=    | 2.915066425 |
| High | Q9BVL4 | Selenoprotein O OS=Homo sapiens OX=9606 GN=SELENO        | 2.902395671 |
| High | Q96JJ7 | Protein disulfide-isomerase TMX3 OS=Homo sapiens OX=     | 2.897223385 |
| High | Q9NQH7 | Xaa-Pro aminopeptidase 3 OS=Homo sapiens OX=9606 GN      | 2.883359386 |
| High | Q8N6R0 | Methyltransferase-like protein 13 OS=Homo sapiens OX=    | 2.881404635 |
| High | Q9Y217 | Myotubularin-related protein 6 OS=Homo sapiens OX=96     | 2.876801925 |
| High | Q13155 | Aminoacyl tRNA synthase complex-interacting multifuncti  | 2.863279433 |
| High | Q9UPT5 | Exocyst complex component 7 OS=Homo sapiens OX=960       | 2.856048884 |
| High | Q14139 | Ubiquitin conjugation factor E4 A OS=Homo sapiens OX=    | 2.854182286 |
| High | P43487 | Ran-specific GTPase-activating protein OS=Homo sapiens   | 2.851705903 |
| High | Q9Y679 | Ancient ubiquitous protein 1 OS=Homo sapiens OX=9606     | 2.845576027 |
| High | Q13057 | Bifunctional coenzyme A synthase OS=Homo sapiens OX=     | 2.844360366 |
| High | O95197 | Reticulon-3 OS=Homo sapiens OX=9606 GN=RTN3 PE=1 S       | 2.841336019 |
| High | P28838 | Cytosol aminopeptidase OS=Homo sapiens OX=9606 GN=       | 2.835052627 |
| High | Q9UJA5 | tRNA (adenine(58)-N(1))-methyltransferase non-catalytic  | 2.826522357 |
| High | P62854 | 40S ribosomal protein S26 OS=Homo sapiens OX=9606 GN     | 2.824198367 |
| High | Q9UHH6 | Sedoheptulokinase OS=Homo sapiens OX=9606 GN=SHPK        | 2.811634074 |
| High | Q9BUT1 | 3-hydroxybutyrate dehydrogenase type 2 OS=Homo sapie     | 2.808548986 |
| High | Q15185 | Prostaglandin E synthase 3 OS=Homo sapiens OX=9606 G     | 2.808269607 |
| High | Q9H269 | Vacuolar protein sorting-associated protein 16 homolog C | 2.805208242 |
| High | P29144 | Tripeptidyl-peptidase 2 OS=Homo sapiens OX=9606 GN=T     | 2.798876103 |
| High | Q5T447 | E3 ubiquitin-protein ligase HECTD3 OS=Homo sapiens OX=   | 2.794795636 |
| High | Q9HAU0 | Pleckstrin homology domain-containing family A member    | 2.792365633 |
| High | O00203 | AP-3 complex subunit beta-1 OS=Homo sapiens OX=9606      | 2.791021483 |

|      |        |                                                                      |             |
|------|--------|----------------------------------------------------------------------|-------------|
| High | Q15102 | Platelet-activating factor acetylhydrolase IB subunit gamma          | 2.785156152 |
| High | O96005 | Cleft lip and palate transmembrane protein 1 OS=Homo sapiens         | 2.780153614 |
| High | P28070 | Proteasome subunit beta type-4 OS=Homo sapiens OX=9606               | 2.774174009 |
| High | Q9H0W8 | Protein SMG9 OS=Homo sapiens OX=9606 GN=SMG9 PE=1                    | 2.772884917 |
| High | P12270 | Nucleoprotein TPR OS=Homo sapiens OX=9606 GN=TPR F                   | 2.762959209 |
| High | P08708 | 40S ribosomal protein S17 OS=Homo sapiens OX=9606 GN=S17             | 2.758951849 |
| High | Q9BV20 | Methylthioribose-1-phosphate isomerase OS=Homo sapiens               | 2.758702613 |
| High | Q8WWC4 | m-AAA protease-interacting protein 1, mitochondrial OS=Homo sapiens  | 2.757955761 |
| High | Q9GZS3 | WD repeat-containing protein 61 OS=Homo sapiens OX=9606              | 2.7490923   |
| High | Q9HCG8 | Pre-mRNA-splicing factor CWC22 homolog OS=Homo sapiens               | 2.741841807 |
| High | Q13425 | Beta-2-syntrophin OS=Homo sapiens OX=9606 GN=SNTB2                   | 2.736127323 |
| High | Q8NFAQ | Torsin-1A-interacting protein 2 OS=Homo sapiens OX=9606              | 2.715569266 |
| High | P46063 | ATP-dependent DNA helicase Q1 OS=Homo sapiens OX=9606                | 2.711527199 |
| High | O96019 | Actin-like protein 6A OS=Homo sapiens OX=9606 GN=ACTL6A              | 2.708853238 |
| High | Q06546 | GA-binding protein alpha chain OS=Homo sapiens OX=9606               | 2.701365217 |
| High | P53990 | IST1 homolog OS=Homo sapiens OX=9606 GN=IST1 PE=1                    | 2.691649051 |
| High | Q8WUF5 | RelA-associated inhibitor OS=Homo sapiens OX=9606 GN=RAI1            | 2.685500772 |
| High | P49207 | 60S ribosomal protein L34 OS=Homo sapiens OX=9606 GN=L34             | 2.684239509 |
| High | Q9C0C7 | Activating molecule in BECN1-regulated autophagy protein 1           | 2.682145511 |
| High | O96000 | NADH dehydrogenase [ubiquinone] 1 beta subcomplex subunit 6          | 2.6712128   |
| High | Q9NR12 | PDZ and LIM domain protein 7 OS=Homo sapiens OX=9606                 | 2.653451441 |
| High | Q01968 | Inositol polyphosphate 5-phosphatase OCRL-1 OS=Homo sapiens          | 2.653255945 |
| High | Q5SRD1 | Putative mitochondrial import inner membrane translocator            | 2.634699251 |
| High | Q96RF0 | Sorting nexin-18 OS=Homo sapiens OX=9606 GN=SNX18 F                  | 2.632271454 |
| High | P00966 | Argininosuccinate synthase OS=Homo sapiens OX=9606 GN=ASS1           | 2.619672763 |
| High | P08621 | U1 small nuclear ribonucleoprotein 70 kDa OS=Homo sapiens            | 2.602407566 |
| High | Q9H7H0 | Methyltransferase-like protein 17, mitochondrial OS=Homo sapiens     | 2.602059991 |
| High | O95219 | Sorting nexin-4 OS=Homo sapiens OX=9606 GN=SNX4 PE=1                 | 2.585360853 |
| High | Q8N5A5 | Zinc finger CCCH-type with G patch domain-containing protein 1       | 2.566070234 |
| High | O60645 | Exocyst complex component 3 OS=Homo sapiens OX=9606                  | 2.5551748   |
| High | Q92609 | TBC1 domain family member 5 OS=Homo sapiens OX=9606                  | 2.553307534 |
| High | Q9Y314 | Nitric oxide synthase-interacting protein OS=Homo sapiens            | 2.549750892 |
| High | Q6P2H3 | Centrosomal protein of 85 kDa OS=Homo sapiens OX=9606                | 2.541815564 |
| High | Q5VZE5 | N-alpha-acetyltransferase 35, NatC auxiliary subunit OS=Homo sapiens | 2.527536103 |
| High | Q9BY77 | Polymerase delta-interacting protein 3 OS=Homo sapiens               | 2.526951195 |
| High | Q9H4L7 | SWI/SNF-related matrix-associated actin-dependent regulator of       | 2.520856752 |
| High | Q9H9T3 | Elongator complex protein 3 OS=Homo sapiens OX=9606                  | 2.520280765 |
| High | Q9Y467 | Sal-like protein 2 OS=Homo sapiens OX=9606 GN=SALL2 F                | 2.519993057 |
| High | P02786 | Transferrin receptor protein 1 OS=Homo sapiens OX=9606               | 2.498803758 |
| High | O95905 | Protein ecdysoneless homolog OS=Homo sapiens OX=9606                 | 2.484523559 |
| High | Q92599 | Septin-8 OS=Homo sapiens OX=9606 GN=SEPT8 PE=1 SV=1                  | 2.48148606  |
| High | Q9HD45 | Transmembrane 9 superfamily member 3 OS=Homo sapiens                 | 2.466355021 |
| High | Q9P253 | Vacuolar protein sorting-associated protein 18 homolog C             | 2.463189134 |
| High | O43318 | Mitogen-activated protein kinase kinase kinase 7 OS=Homo sapiens     | 2.451242171 |
| High | Q8IYQ7 | Threonine synthase-like 1 OS=Homo sapiens OX=9606 GN=TSN1            | 2.451119437 |
| High | O15479 | Melanoma-associated antigen B2 OS=Homo sapiens OX=9606               | 2.438421632 |
| High | Q14691 | DNA replication complex GINS protein PSF1 OS=Homo sapiens            | 2.438064237 |
| High | Q8IVD9 | NudC domain-containing protein 3 OS=Homo sapiens OX=9606             | 2.434860848 |
| High | Q9UNN5 | FAS-associated factor 1 OS=Homo sapiens OX=9606 GN=FAF1              | 2.413187731 |
| High | P33981 | Dual specificity protein kinase TTK OS=Homo sapiens OX=9606          | 2.412850502 |

|      |        |                                                            |             |
|------|--------|------------------------------------------------------------|-------------|
| High | Q9UI10 | Translation initiation factor eIF-2B subunit delta OS=Homo | 2.412176829 |
| High | Q9NW64 | Pre-mRNA-splicing factor RBM22 OS=Homo sapiens OX=9        | 2.409715596 |
| High | P83881 | 60S ribosomal protein L36a OS=Homo sapiens OX=9606 G       | 2.405276054 |
| High | Q15118 | [Pyruvate dehydrogenase (acetyl-transferring)] kinase iso  | 2.402414498 |
| High | Q9UNS2 | COP9 signalosome complex subunit 3 OS=Homo sapiens C       | 2.401209493 |
| High | Q8IWZ3 | Ankyrin repeat and KH domain-containing protein 1 OS=H     | 2.398454746 |
| High | Q9UBE0 | SUMO-activating enzyme subunit 1 OS=Homo sapiens OX        | 2.394479477 |
| High | A6NHR9 | Structural maintenance of chromosomes flexible hinge dc    | 2.384681343 |
| High | O60678 | Protein arginine N-methyltransferase 3 OS=Homo sapiens     | 2.378408324 |
| High | Q9NXE4 | Sphingomyelin phosphodiesterase 4 OS=Homo sapiens O)       | 2.377682339 |
| High | O75792 | Ribonuclease H2 subunit A OS=Homo sapiens OX=9606 G        | 2.371611107 |
| High | Q8NEZ5 | F-box only protein 22 OS=Homo sapiens OX=9606 GN=FB        | 2.366834646 |
| High | Q8NI27 | THO complex subunit 2 OS=Homo sapiens OX=9606 GN=T         | 2.364616796 |
| High | Q9NUL3 | Double-stranded RNA-binding protein Staufen homolog 2      | 2.358300303 |
| High | Q9NTJ5 | Phosphatidylinositide phosphatase SAC1 OS=Homo sapier      | 2.354675998 |
| High | Q9UHY7 | Enolase-phosphatase E1 OS=Homo sapiens OX=9606 GN=         | 2.343422709 |
| High | P98175 | RNA-binding protein 10 OS=Homo sapiens OX=9606 GN=f        | 2.342657263 |
| High | Q9BZV1 | UBX domain-containing protein 6 OS=Homo sapiens OX=9       | 2.338944915 |
| High | Q7Z2Y8 | Interferon-induced very large GTPase 1 OS=Homo sapiens     | 2.332360294 |
| High | Q9NRN7 | L-aminoadipate-semialdehyde dehydrogenase-phosphop         | 2.330962199 |
| High | P62888 | 60S ribosomal protein L30 OS=Homo sapiens OX=9606 GN       | 2.32339783  |
| High | Q9BTE7 | DCN1-like protein 5 OS=Homo sapiens OX=9606 GN=DCU         | 2.321481621 |
| High | Q9H773 | dCTP pyrophosphatase 1 OS=Homo sapiens OX=9606 GN=         | 2.316772794 |
| High | O60566 | Mitotic checkpoint serine/threonine-protein kinase BUB1    | 2.315783205 |
| High | Q9Y5Y2 | Cytosolic Fe-S cluster assembly factor NUBP2 OS=Homo s     | 2.306360974 |
| High | Q9UBK8 | Methionine synthase reductase OS=Homo sapiens OX=96        | 2.290560426 |
| High | Q7Z5K2 | Wings apart-like protein homolog OS=Homo sapiens OX=9      | 2.288192771 |
| High | P49257 | Protein ERGIC-53 OS=Homo sapiens OX=9606 GN=LMAN1          | 2.287182    |
| High | Q9H6R7 | WD repeat and coiled-coil-containing protein OS=Homo s     | 2.286257522 |
| High | P57772 | Selenocysteine-specific elongation factor OS=Homo sapie    | 2.282163133 |
| High | Q96EY7 | Pentatricopeptide repeat domain-containing protein 3, m    | 2.274823699 |
| High | O60333 | Kinesin-like protein KIF1B OS=Homo sapiens OX=9606 GN      | 2.271727402 |
| High | Q9HBI1 | Beta-parvin OS=Homo sapiens OX=9606 GN=PARVB PE=1          | 2.26520017  |
| High | Q86YR5 | G-protein-signaling modulator 1 OS=Homo sapiens OX=96      | 2.255315937 |
| High | Q9ULC4 | Malignant T-cell-amplified sequence 1 OS=Homo sapiens      | 2.254769015 |
| High | Q8WUM0 | Nuclear pore complex protein Nup133 OS=Homo sapiens        | 2.239577517 |
| High | P12081 | Histidine--tRNA ligase, cytoplasmic OS=Homo sapiens OX=    | 2.239502125 |
| High | O00743 | Serine/threonine-protein phosphatase 6 catalytic subunit   | 2.229589868 |
| High | Q8IV08 | Phospholipase D3 OS=Homo sapiens OX=9606 GN=PLD3 F         | 2.213390527 |
| High | Q8WVX9 | Fatty acyl-CoA reductase 1 OS=Homo sapiens OX=9606 G       | 2.208660296 |
| High | P00156 | Cytochrome b OS=Homo sapiens OX=9606 GN=MT-CYB P           | 2.205790884 |
| High | O95551 | Tyrosyl-DNA phosphodiesterase 2 OS=Homo sapiens OX=        | 2.204050501 |
| High | Q14527 | Helicase-like transcription factor OS=Homo sapiens OX=9    | 2.195111255 |
| High | Q8TCJ2 | Dolichyl-diphosphooligosaccharide--protein glycosyltrans   | 2.138226703 |
| High | Q9P0I2 | ER membrane protein complex subunit 3 OS=Homo sapie        | 2.134126472 |
| High | P43307 | Translocon-associated protein subunit alpha OS=Homo sa     | 2.133949076 |
| High | Q96J01 | THO complex subunit 3 OS=Homo sapiens OX=9606 GN=T         | 2.132827249 |
| High | Q8ND04 | Protein SMG8 OS=Homo sapiens OX=9606 GN=SMG8 PE=           | 2.124302238 |
| High | Q9NT62 | Ubiquitin-like-conjugating enzyme ATG3 OS=Homo sapier      | 2.109187901 |
| High | P43155 | Carnitine O-acetyltransferase OS=Homo sapiens OX=9606      | 2.106959888 |

|        |        |                                                                                              |             |
|--------|--------|----------------------------------------------------------------------------------------------|-------------|
| High   | Q9UBV2 | Protein sel-1 homolog 1 OS=Homo sapiens OX=9606 GN=                                          | 2.105517785 |
| High   | P09429 | High mobility group protein B1 OS=Homo sapiens OX=9606 GN=                                   | 2.103584024 |
| High   | P15153 | Ras-related C3 botulinum toxin substrate 2 OS=Homo sapiens OX=9606 GN=                       | 2.090925599 |
| High   | O14974 | Protein phosphatase 1 regulatory subunit 12A OS=Homo sapiens OX=9606 GN=                     | 2.079302866 |
| High   | Q9NV88 | Integrator complex subunit 9 OS=Homo sapiens OX=9606 GN=                                     | 2.077067043 |
| High   | Q15070 | Mitochondrial inner membrane protein OXA1L OS=Homo sapiens OX=9606 GN=                       | 2.069356559 |
| High   | Q15061 | WD repeat-containing protein 43 OS=Homo sapiens OX=9606 GN=                                  | 2.067678468 |
| High   | Q8IWT6 | Volume-regulated anion channel subunit LRRC8A OS=Homo sapiens OX=9606 GN=                    | 2.057545474 |
| High   | Q9UBQ5 | Eukaryotic translation initiation factor 3 subunit K OS=Homo sapiens OX=9606 GN=             | 2.051342568 |
| High   | Q8N3R9 | MAGUK p55 subfamily member 5 OS=Homo sapiens OX=9606 GN=                                     | 2.031376979 |
| High   | Q96DV4 | 39S ribosomal protein L38, mitochondrial OS=Homo sapiens OX=9606 GN=                         | 2.029792641 |
| High   | P59046 | NACHT, LRR and PYD domains-containing protein 12 OS=Homo sapiens OX=9606 GN=                 | 2.018951941 |
| High   | Q5T160 | Probable arginine--tRNA ligase, mitochondrial OS=Homo sapiens OX=9606 GN=                    | 2.01313873  |
| Medium | P21399 | Cytoplasmic aconitate hydratase OS=Homo sapiens OX=9606 GN=                                  | 2.001566281 |
| Medium | Q9Y3Q3 | Transmembrane emp24 domain-containing protein 3 OS=Homo sapiens OX=9606 GN=                  | 1.991825816 |
| Medium | Q13557 | Calcium/calmodulin-dependent protein kinase type II subunit beta OS=Homo sapiens OX=9606 GN= | 1.981715692 |
| Medium | Q9H8Y8 | Golgi reassembly-stacking protein 2 OS=Homo sapiens OX=9606 GN=                              | 1.973058372 |
| Medium | P67870 | Casein kinase II subunit beta OS=Homo sapiens OX=9606 GN=                                    | 1.971835581 |
| Medium | Q5VWZ2 | Lysophospholipase-like protein 1 OS=Homo sapiens OX=9606 GN=                                 | 1.971428747 |
| Medium | P23634 | Plasma membrane calcium-transporting ATPase 4 OS=Homo sapiens OX=9606 GN=                    | 1.966576245 |
| Medium | Q9ULV4 | Coronin-1C OS=Homo sapiens OX=9606 GN=                                                       | 1.961379838 |
| Medium | Q9NP92 | 39S ribosomal protein S30, mitochondrial OS=Homo sapiens OX=9606 GN=                         | 1.956637722 |
| Medium | Q15018 | BRISC complex subunit Abraxas 2 OS=Homo sapiens OX=9606 GN=                                  | 1.951169913 |
| Medium | P62851 | 40S ribosomal protein S25 OS=Homo sapiens OX=9606 GN=                                        | 1.950394387 |
| Medium | Q9Y2R4 | Probable ATP-dependent RNA helicase DDX52 OS=Homo sapiens OX=9606 GN=                        | 1.948847478 |
| Medium | Q00535 | Cyclin-dependent-like kinase 5 OS=Homo sapiens OX=9606 GN=                                   | 1.932442649 |
| Medium | Q15750 | TGF-beta-activated kinase 1 and MAP3K7-binding protein OS=Homo sapiens OX=9606 GN=           | 1.926648298 |
| Medium | Q2VIQ3 | Chromosome-associated kinesin KIF4B OS=Homo sapiens OX=9606 GN=                              | 1.924453039 |
| Medium | P00367 | Glutamate dehydrogenase 1, mitochondrial OS=Homo sapiens OX=9606 GN=                         | 1.912218582 |
| Medium | Q70CQ1 | Ubiquitin carboxyl-terminal hydrolase 49 OS=Homo sapiens OX=9606 GN=                         | 1.904481958 |
| Medium | Q9UKZ1 | CCR4-NOT transcription complex subunit 11 OS=Homo sapiens OX=9606 GN=                        | 1.887060024 |
| Medium | Q08379 | Golgin subfamily A member 2 OS=Homo sapiens OX=9606 GN=                                      | 1.878112015 |
| Medium | Q6ZNE9 | RUN and FYVE domain-containing protein 4 OS=Homo sapiens OX=9606 GN=                         | 1.878112015 |
| Medium | Q9Y5Q9 | General transcription factor 3C polypeptide 3 OS=Homo sapiens OX=9606 GN=                    | 1.876148359 |
| Medium | O95071 | E3 ubiquitin-protein ligase UBR5 OS=Homo sapiens OX=9606 GN=                                 | 1.869023308 |
| Medium | P49748 | Very long-chain specific acyl-CoA dehydrogenase, mitochondrial OS=Homo sapiens OX=9606 GN=   | 1.861381566 |
| Medium | P82930 | 28S ribosomal protein S34, mitochondrial OS=Homo sapiens OX=9606 GN=                         | 1.849857838 |
| Medium | Q6NSI4 | RPA-related protein RADX OS=Homo sapiens OX=9606 GN=                                         | 1.849550591 |
| Medium | Q15005 | Signal peptidase complex subunit 2 OS=Homo sapiens OX=9606 GN=                               | 1.843148099 |
| Medium | Q9NZL9 | Methionine adenosyltransferase 2 subunit beta OS=Homo sapiens OX=9606 GN=                    | 1.840432807 |
| Medium | Q02218 | 2-oxoglutarate dehydrogenase, mitochondrial OS=Homo sapiens OX=9606 GN=                      | 1.837435593 |
| Medium | Q15063 | Periostin OS=Homo sapiens OX=9606 GN=POSTN PE=1 SV=1                                         | 1.835052627 |
| Medium | Q8IZP0 | Abl interactor 1 OS=Homo sapiens OX=9606 GN=ABI1 PE=1 SV=1                                   | 1.827105302 |
| Medium | Q6PRD1 | Probable G-protein coupled receptor 179 OS=Homo sapiens OX=9606 GN=                          | 1.805208242 |
| Medium | Q68CQ7 | Glycosyltransferase 8 domain-containing protein 1 OS=Homo sapiens OX=9606 GN=                | 1.797239313 |
| Medium | P05026 | Sodium/potassium-transporting ATPase subunit beta-1 OS=Homo sapiens OX=9606 GN=              | 1.78968148  |
| Medium | P36957 | Dihydrolipoyllysine-residue succinyltransferase component beta OS=Homo sapiens OX=9606 GN=   | 1.788345599 |
| Medium | Q5VWQ8 | Disabled homolog 2-interacting protein OS=Homo sapiens OX=9606 GN=                           | 1.786216701 |
| Medium | Q5JXC2 | Migration and invasion-inhibitory protein OS=Homo sapiens OX=9606 GN=                        | 1.77702355  |
| Medium | P30038 | Delta-1-pyrroline-5-carboxylate dehydrogenase, mitochondrial OS=Homo sapiens OX=9606 GN=     | 1.766242637 |

|        |        |                                                            |             |
|--------|--------|------------------------------------------------------------|-------------|
| Medium | Q96T37 | RNA-binding protein 15 OS=Homo sapiens OX=9606 GN=F        | 1.744004273 |
| Medium | Q9UH99 | SUN domain-containing protein 2 OS=Homo sapiens OX=9       | 1.728855682 |
| Medium | Q8WWK9 | Cytoskeleton-associated protein 2 OS=Homo sapiens OX=      | 1.721475035 |
| Medium | P37837 | Transaldolase OS=Homo sapiens OX=9606 GN=TALDO1 PI         | 1.714217726 |
| Medium | Q9NRC1 | Suppressor of tumorigenicity 7 protein OS=Homo sapiens     | 1.708187313 |
| Medium | P18887 | DNA repair protein XRCC1 OS=Homo sapiens OX=9606 GN        | 1.695078838 |
| Medium | O15357 | Phosphatidylinositol 3,4,5-trisphosphate 5-phosphatase 2   | 1.693789492 |
| Medium | O60563 | Cyclin-T1 OS=Homo sapiens OX=9606 GN=CCNT1 PE=1 SV         | 1.683191248 |
| Medium | P20042 | Eukaryotic translation initiation factor 2 subunit 2 OS=Ho | 1.679230772 |
| Medium | Q5PRF9 | Protein Smaug homolog 2 OS=Homo sapiens OX=9606 GN         | 1.676335464 |
| Medium | P11387 | DNA topoisomerase 1 OS=Homo sapiens OX=9606 GN=TC          | 1.671620397 |
| Medium | Q6P1M0 | Long-chain fatty acid transport protein 4 OS=Homo sapier   | 1.660946264 |
| Medium | Q9BV86 | N-terminal Xaa-Pro-Lys N-methyltransferase 1 OS=Homo       | 1.655804284 |
| Medium | P07203 | Glutathione peroxidase 1 OS=Homo sapiens OX=9606 GN        | 1.647817482 |
| Medium | O14818 | Proteasome subunit alpha type-7 OS=Homo sapiens OX=9       | 1.635073966 |
| Medium | Q9NTI5 | Sister chromatid cohesion protein PDS5 homolog B OS=Ho     | 1.634137785 |
| Medium | Q8TEA1 | Putative methyltransferase NSUN6 OS=Homo sapiens OX:       | 1.632085261 |
| Medium | P11274 | Breakpoint cluster region protein OS=Homo sapiens OX=9     | 1.62948691  |
| Medium | Q9UPY3 | Endoribonuclease Dicer OS=Homo sapiens OX=9606 GN=I        | 1.627087997 |
| Medium | Q08170 | Serine/arginine-rich splicing factor 4 OS=Homo sapiens O)  | 1.624153564 |
| Medium | Q8IX18 | Probable ATP-dependent RNA helicase DHX40 OS=Homo          | 1.613322716 |
| Medium | P82675 | 28S ribosomal protein S5, mitochondrial OS=Homo sapier     | 1.611898798 |
| Medium | P09960 | Leukotriene A-4 hydrolase OS=Homo sapiens OX=9606 GF       | 1.608183076 |
| Medium | Q96ER9 | Coiled-coil domain-containing protein 51 OS=Homo sapie     | 1.602581458 |
| Medium | Q13085 | Acetyl-CoA carboxylase 1 OS=Homo sapiens OX=9606 GN        | 1.598771833 |
| Medium | Q9UIU6 | Homeobox protein SIX4 OS=Homo sapiens OX=9606 GN=:         | 1.596022036 |
| Medium | Q96BM9 | ADP-ribosylation factor-like protein 8A OS=Homo sapiens    | 1.595166283 |
| Medium | O60879 | Protein diaphanous homolog 2 OS=Homo sapiens OX=960        | 1.586197483 |
| Medium | Q9Y570 | Protein phosphatase methylesterase 1 OS=Homo sapiens       | 1.581201709 |
| Medium | Q969Y2 | tRNA modification GTPase GTPBP3, mitochondrial OS=Ho       | 1.574139855 |
| Medium | Q9UI12 | V-type proton ATPase subunit H OS=Homo sapiens OX=96       | 1.560193789 |
| Medium | Q96HU8 | GTP-binding protein Di-Ras2 OS=Homo sapiens OX=9606        | 1.559563234 |
| Medium | Q6P2I3 | Fumarylacetoacetate hydrolase domain-containing protei     | 1.558304864 |
| Medium | Q96CT7 | Coiled-coil domain-containing protein 124 OS=Homo sapi     | 1.552686891 |
| Medium | Q86WI3 | Protein NLRC5 OS=Homo sapiens OX=9606 GN=NLRC5 PE          | 1.550213153 |
| Medium | P11233 | Ras-related protein Ral-A OS=Homo sapiens OX=9606 GN:      | 1.542875374 |
| Medium | Q9BY44 | Eukaryotic translation initiation factor 2A OS=Homo sapie  | 1.541815564 |
| Medium | Q5T5X7 | BEN domain-containing protein 3 OS=Homo sapiens OX=9       | 1.535361441 |
| Medium | Q92997 | Segment polarity protein dishevelled homolog DVL-3 OS=     | 1.532096053 |
| Medium | Q3B7T1 | Erythroid differentiation-related factor 1 OS=Homo sapie   | 1.521433504 |
| Medium | Q8TDN6 | Ribosome biogenesis protein BRX1 homolog OS=Homo sa        | 1.520280765 |
| Medium | P23284 | Peptidyl-prolyl cis-trans isomerase B OS=Homo sapiens O)   | 1.515557792 |
| Medium | P25788 | Proteasome subunit alpha type-3 OS=Homo sapiens OX=9       | 1.500863005 |
| Medium | Q86YT6 | E3 ubiquitin-protein ligase MIB1 OS=Homo sapiens OX=96     | 1.496754229 |
| Medium | O60343 | TBC1 domain family member 4 OS=Homo sapiens OX=960         | 1.467500414 |
| Medium | Q7Z4H7 | HAUS augmin-like complex subunit 6 OS=Homo sapiens O       | 1.465719995 |
| Medium | Q99490 | Arf-GAP with GTPase, ANK repeat and PH domain-contain      | 1.464073259 |
| Medium | O75718 | Cartilage-associated protein OS=Homo sapiens OX=9606       | 1.462558717 |
| Medium | Q9UDR5 | Alpha-aminoadipic semialdehyde synthase, mitochondria      | 1.453333975 |
| Medium | Q13242 | Serine/arginine-rich splicing factor 9 OS=Homo sapiens O)  | 1.444059562 |

|        |        |                                                            |             |
|--------|--------|------------------------------------------------------------|-------------|
| Medium | P07339 | Cathepsin D OS=Homo sapiens OX=9606 GN=CTSD PE=1 S         | 1.443335738 |
| Medium | Q9Y6X3 | MAU2 chromatid cohesion factor homolog OS=Homo sap         | 1.443094731 |
| Medium | P08579 | U2 small nuclear ribonucleoprotein B'' OS=Homo sapiens     | 1.442132038 |
| Medium | Q9BW60 | Elongation of very long chain fatty acids protein 1 OS=Hor | 1.436637591 |
| Medium | Q9UBQ7 | Glyoxylate reductase/hydroxypyruvate reductase OS=Hor      | 1.429924295 |
| Medium | Q9NYB0 | Telomeric repeat-binding factor 2-interacting protein 1 O  | 1.429223631 |
| Medium | Q9BZ23 | Pantothenate kinase 2, mitochondrial OS=Homo sapiens (     | 1.422623108 |
| Medium | Q9Y5A7 | NEDD8 ultimate buster 1 OS=Homo sapiens OX=9606 GN=        | 1.410273744 |
| Medium | Q9BXW6 | Oxysterol-binding protein-related protein 1 OS=Homo sap    | 1.386475297 |
| Medium | O95801 | Tetratricopeptide repeat protein 4 OS=Homo sapiens OX=     | 1.379968105 |
| Medium | O75165 | DnaJ homolog subfamily C member 13 OS=Homo sapiens         | 1.379447555 |
| Medium | Q9HBE4 | Interleukin-21 OS=Homo sapiens OX=9606 GN=IL21 PE=1        | 1.370998381 |
| Medium | Q99797 | Mitochondrial intermediate peptidase OS=Homo sapiens       | 1.370386555 |
| Medium | P15927 | Replication protein A 32 kDa subunit OS=Homo sapiens O     | 1.367947833 |
| Medium | Q96GC9 | Vacuole membrane protein 1 OS=Homo sapiens OX=9606         | 1.35349825  |
| Medium | Q53TS8 | C2 calcium-dependent domain-containing protein 6 OS=H      | 1.34930402  |
| Medium | O15084 | Serine/threonine-protein phosphatase 6 regulatory ankyr    | 1.348431261 |
| Medium | Q99447 | Ethanolamine-phosphate cytidyltransferase OS=Homo s        | 1.345630909 |
| Medium | Q9NWX5 | Ankyrin repeat and SOCS box protein 6 OS=Homo sapiens      | 1.336770365 |
| Medium | Q96MR6 | Cilia- and flagella-associated protein 57 OS=Homo sapiens  | 1.333201316 |
| Medium | Q5JVF3 | PCI domain-containing protein 2 OS=Homo sapiens OX=96      | 1.328734567 |
| Medium | Q99714 | 3-hydroxyacyl-CoA dehydrogenase type-2 OS=Homo sapie       | 1.318397001 |
| Medium | P29474 | Nitric oxide synthase, endothelial OS=Homo sapiens OX=9    | 1.315064917 |
| Medium | Q2TAY7 | WD40 repeat-containing protein SMU1 OS=Homo sapiens        | 1.298000525 |
| Medium | P46087 | Probable 28S rRNA (cytosine(4447)-C(5))-methyltransfera    | 1.288952396 |
| Medium | Q9Y4C1 | Lysine-specific demethylase 3A OS=Homo sapiens OX=960      | 1.288361462 |
| Medium | Q99426 | Tubulin-folding cofactor B OS=Homo sapiens OX=9606 GN      | 1.2817475   |
| Medium | Q9UHQ9 | NADH-cytochrome b5 reductase 1 OS=Homo sapiens OX=         | 1.278931698 |
| Medium | Q969X6 | U3 small nucleolar RNA-associated protein 4 homolog OS     | 1.274496731 |
| Medium | Q86UE4 | Protein LYRIC OS=Homo sapiens OX=9606 GN=MTDH PE=          | 1.27205229  |
| Medium | Q7RTP6 | [F-actin]-monooxygenase MICAL3 OS=Homo sapiens OX=9        | 1.264241463 |
| Medium | Q9BYD2 | 39S ribosomal protein L9, mitochondrial OS=Homo sapier     | 1.262568799 |
| Medium | P15531 | Nucleoside diphosphate kinase A OS=Homo sapiens OX=9       | 1.262409834 |
| Medium | P36268 | Inactive glutathione hydrolase 2 OS=Homo sapiens OX=96     | 1.251734427 |
| Medium | O14776 | Transcription elongation regulator 1 OS=Homo sapiens O     | 1.251424383 |
| Medium | Q92925 | SWI/SNF-related matrix-associated actin-dependent regul    | 1.250186415 |
| Medium | Q9NRY5 | Protein FAM114A2 OS=Homo sapiens OX=9606 GN=FAM:           | 1.24910608  |
| Medium | Q5PSV4 | Breast cancer metastasis-suppressor 1-like protein OS=Hc   | 1.245498771 |
| Medium | Q7RTY1 | Monocarboxylate transporter 9 OS=Homo sapiens OX=96        | 1.233884717 |
| Medium | Q6PML9 | Zinc transporter 9 OS=Homo sapiens OX=9606 GN=SLC30        | 1.218316415 |
| Medium | Q96BV0 | Zinc finger protein 775 OS=Homo sapiens OX=9606 GN=Z       | 1.217312432 |
| Medium | Q9Y5I4 | Protocadherin alpha-C2 OS=Homo sapiens OX=9606 GN=I        | 1.210771943 |
| Medium | Q13217 | DnaJ homolog subfamily C member 3 OS=Homo sapiens C        | 1.205093893 |
| Medium | P48681 | Nestin OS=Homo sapiens OX=9606 GN=NES PE=1 SV=2            | 1.203772686 |
| Medium | Q5T0B9 | Zinc finger protein 362 OS=Homo sapiens OX=9606 GN=Z       | 1.198664904 |
| Medium | Q93050 | V-type proton ATPase 116 kDa subunit a isoform 1 OS=Hc     | 1.197021145 |
| Medium | O43309 | Zinc finger and SCAN domain-containing protein 12 OS=H     | 1.196474604 |
| Medium | Q9NZP5 | Olfactory receptor 5AC2 OS=Homo sapiens OX=9606 GN=        | 1.186152246 |
| Medium | Q96M15 | Putative uncharacterized protein IGF2BP2-AS1 OS=Homo       | 1.180192935 |
| Medium | Q9NU22 | Midasin OS=Homo sapiens OX=9606 GN=MDN1 PE=1 SV=           | 1.174249419 |

|        |        |                                                                                                      |             |
|--------|--------|------------------------------------------------------------------------------------------------------|-------------|
| Medium | Q9H6R4 | Nucleolar protein 6 OS=Homo sapiens OX=9606 GN=NOL6                                                  | 1.172114017 |
| Medium | Q9HCS7 | Pre-mRNA-splicing factor SYF1 OS=Homo sapiens OX=9606 GN=SYF1                                        | 1.16615195  |
| Medium | P49757 | Protein numb homolog OS=Homo sapiens OX=9606 GN=NUMB                                                 | 1.162285332 |
| Medium | Q9Y383 | Putative RNA-binding protein Luc7-like 2 OS=Homo sapiens OX=9606 GN=LUC7L2                           | 1.156829535 |
| Medium | P35237 | Serpin B6 OS=Homo sapiens OX=9606 GN=SERPINB6 PE=1 SV=1                                              | 1.145815456 |
| Medium | P09543 | 2',3'-cyclic-nucleotide 3'-phosphodiesterase OS=Homo sapiens OX=9606 GN=NCSTN                        | 1.140741583 |
| Medium | Q9UP83 | Conserved oligomeric Golgi complex subunit 5 OS=Homo sapiens OX=9606 GN=COG5                         | 1.133476374 |
| Medium | Q92542 | Nicastrin OS=Homo sapiens OX=9606 GN=NCSTN PE=1 SV=1                                                 | 1.133417323 |
| Medium | Q8TF72 | Protein Shroom3 OS=Homo sapiens OX=9606 GN=SHROOM3                                                   | 1.129011186 |
| Medium | P02788 | Lactotransferrin OS=Homo sapiens OX=9606 GN=LTF PE=1 SV=1                                            | 1.122571059 |
| Medium | P53597 | Succinate--CoA ligase [ADP/GDP-forming] subunit alpha, mitochondrial OS=Homo sapiens OX=9606 GN=LIG3 | 1.115204636 |
| Medium | Q13123 | Protein Red OS=Homo sapiens OX=9606 GN=IK PE=1 SV=3                                                  | 1.111202933 |
| Medium | Q86VV8 | Rotatin OS=Homo sapiens OX=9606 GN=RRTN PE=1 SV=3                                                    | 1.107849722 |
| Medium | Q7L9L4 | MOB kinase activator 1B OS=Homo sapiens OX=9606 GN=MOBK1B                                            | 1.095500845 |
| Medium | Q9NR77 | Peroxisomal membrane protein 2 OS=Homo sapiens OX=9606 GN=PM2                                        | 1.08396739  |
| Medium | P49916 | DNA ligase 3 OS=Homo sapiens OX=9606 GN=LIG3 PE=1 SV=1                                               | 1.07494588  |
| Medium | Q9NPL8 | Complex I assembly factor TIMMDC1, mitochondrial OS=Homo sapiens OX=9606 GN=TIMMDC1                  | 1.074327006 |
| Medium | Q13421 | Mesothelin OS=Homo sapiens OX=9606 GN=MSLN PE=1 SV=1                                                 | 1.061980903 |
| Medium | Q8NCM8 | Cytoplasmic dynein 2 heavy chain 1 OS=Homo sapiens OX=9606 GN=CYD2HC1                                | 1.057347188 |
| Medium | Q8WXI7 | Mucin-16 OS=Homo sapiens OX=9606 GN=MUC16 PE=1 SV=1                                                  | 1.054137676 |
| Medium | P49354 | Protein farnesyltransferase/geranylgeranyltransferase type I OS=Homo sapiens OX=9606 GN=FTase        | 1.048079926 |
| Medium | P51572 | B-cell receptor-associated protein 31 OS=Homo sapiens OX=9606 GN=BCR31                               | 1.045660991 |
| Medium | Q86Z14 | Beta-klotho OS=Homo sapiens OX=9606 GN=KLB PE=1 SV=1                                                 | 1.041770686 |
| Low    | O75943 | Cell cycle checkpoint protein RAD17 OS=Homo sapiens OX=9606 GN=RAD17                                 | 1.035410413 |
| Low    | Q9NPF4 | Probable tRNA N6-adenosine threonylcarbamoyltransferase OS=Homo sapiens OX=9606 GN=TRNA6A            | 1.03498655  |
| Low    | Q6PIJ6 | F-box only protein 38 OS=Homo sapiens OX=9606 GN=FBX38                                               | 1.026595026 |
| Low    | Q9H0L4 | Cleavage stimulation factor subunit 2 tau variant OS=Homo sapiens OX=9606 GN=CSF2T                   | 1.021773818 |
| Low    | Q8WUA7 | TBC1 domain family member 22A OS=Homo sapiens OX=9606 GN=TBC1D22A                                    | 1.017547849 |
| Low    | P35610 | Sterol O-acyltransferase 1 OS=Homo sapiens OX=9606 GN=SOAT1                                          | 1.004847623 |
| Low    | Q9H9Y2 | Ribosome production factor 1 OS=Homo sapiens OX=9606 GN=RF1                                          | 1.001130636 |
| Low    | Q66K74 | Microtubule-associated protein 1S OS=Homo sapiens OX=9606 GN=MAP1S                                   | 1.001087096 |
| Low    | P01024 | Complement C3 OS=Homo sapiens OX=9606 GN=C3 PE=1 SV=1                                                | 1.001000028 |
| Low    | Q9C0D3 | Protein zyg-11 homolog B OS=Homo sapiens OX=9606 GN=ZYG11B                                           | 0.994819487 |
| Low    | P62910 | 60S ribosomal protein L32 OS=Homo sapiens OX=9606 GN=L32                                             | 0.973875483 |
| Low    | A2A2Z9 | Ankyrin repeat domain-containing protein 18B OS=Homo sapiens OX=9606 GN=ANKRD18B                     | 0.957030927 |
| Low    | Q9UPS8 | Ankyrin repeat domain-containing protein 26 OS=Homo sapiens OX=9606 GN=ANKRD26                       | 0.949620244 |
| Low    | Q86YN1 | Dolichyldiphosphatase 1 OS=Homo sapiens OX=9606 GN=DDP1                                              | 0.946537395 |
| Low    | Q5TZA2 | Rootletin OS=Homo sapiens OX=9606 GN=CROCC PE=1 SV=1                                                 | 0.946153573 |
| Low    | Q96GD0 | Pyridoxal phosphate phosphatase OS=Homo sapiens OX=9606 GN=PPD                                       | 0.913996294 |
| Low    | Q9NYK5 | 39S ribosomal protein L39, mitochondrial OS=Homo sapiens OX=9606 GN=L39                              | 0.908333042 |
| Low    | Q9H000 | Probable E3 ubiquitin-protein ligase makorin-2 OS=Homo sapiens OX=9606 GN=MAKORIN2                   | 0.901356274 |
| Low    | P67812 | Signal peptidase complex catalytic subunit SEC11A OS=Homo sapiens OX=9606 GN=SEC11A                  | 0.900664722 |
